# Supplementary material for: Genome-wide Identification and Characterization of Heat Shock Protein Family Reveals Role in Development and Stress Conditions in Triticum aestivum L
Source: PubMed Central journal article supplement (PMC7217896; doi:10.1038/s41598-020-64746-2), 2020-05-12
Supplement: 41598_2020_64746_MOESM1_ESM.pdf [file 41598_2020_64746_MOESM1_ESM.pdf]

**Genome-wide Identification and Characterization of Heat Shock Protein Family Reveals Role in Development and Stress Conditions in *Triticum aestivum* L.**

**Ashish Kumar<sup>1†</sup>, Saloni Sharma<sup>2†</sup>, Venkatesh Chunduri<sup>2</sup>, Amandeep Kaur<sup>2</sup>, Satinder Kaur<sup>3</sup>, Nikhil Malhotra<sup>2</sup>, Aman Kumar<sup>2</sup>, Payal Kapoor<sup>2</sup>, Anita Kumari<sup>2</sup>, Jaspreet Kaur<sup>4</sup>, Humira Sonah<sup>2\*</sup> and Monika Garg<sup>2\*</sup>**

<sup>1</sup> South Asian University, Chankyapuri, New Delhi, India 110021

<sup>2</sup> Agri-Biotechnology Division, National Agri-Food Biotechnology Institute (NABI), S.A.S. Nagar (Mohali), Punjab, India

<sup>3</sup> Punjab Agricultural University, Ludhiana 141004

<sup>4</sup> UIET, PU, Chandigarh-160014

<sup>†</sup> Contributed equally

**\*Corresponding author: [biohuma@gmail.com](mailto:biohuma@gmail.com) and [mkajgarg@gmail.com](mailto:mkajgarg@gmail.com)**



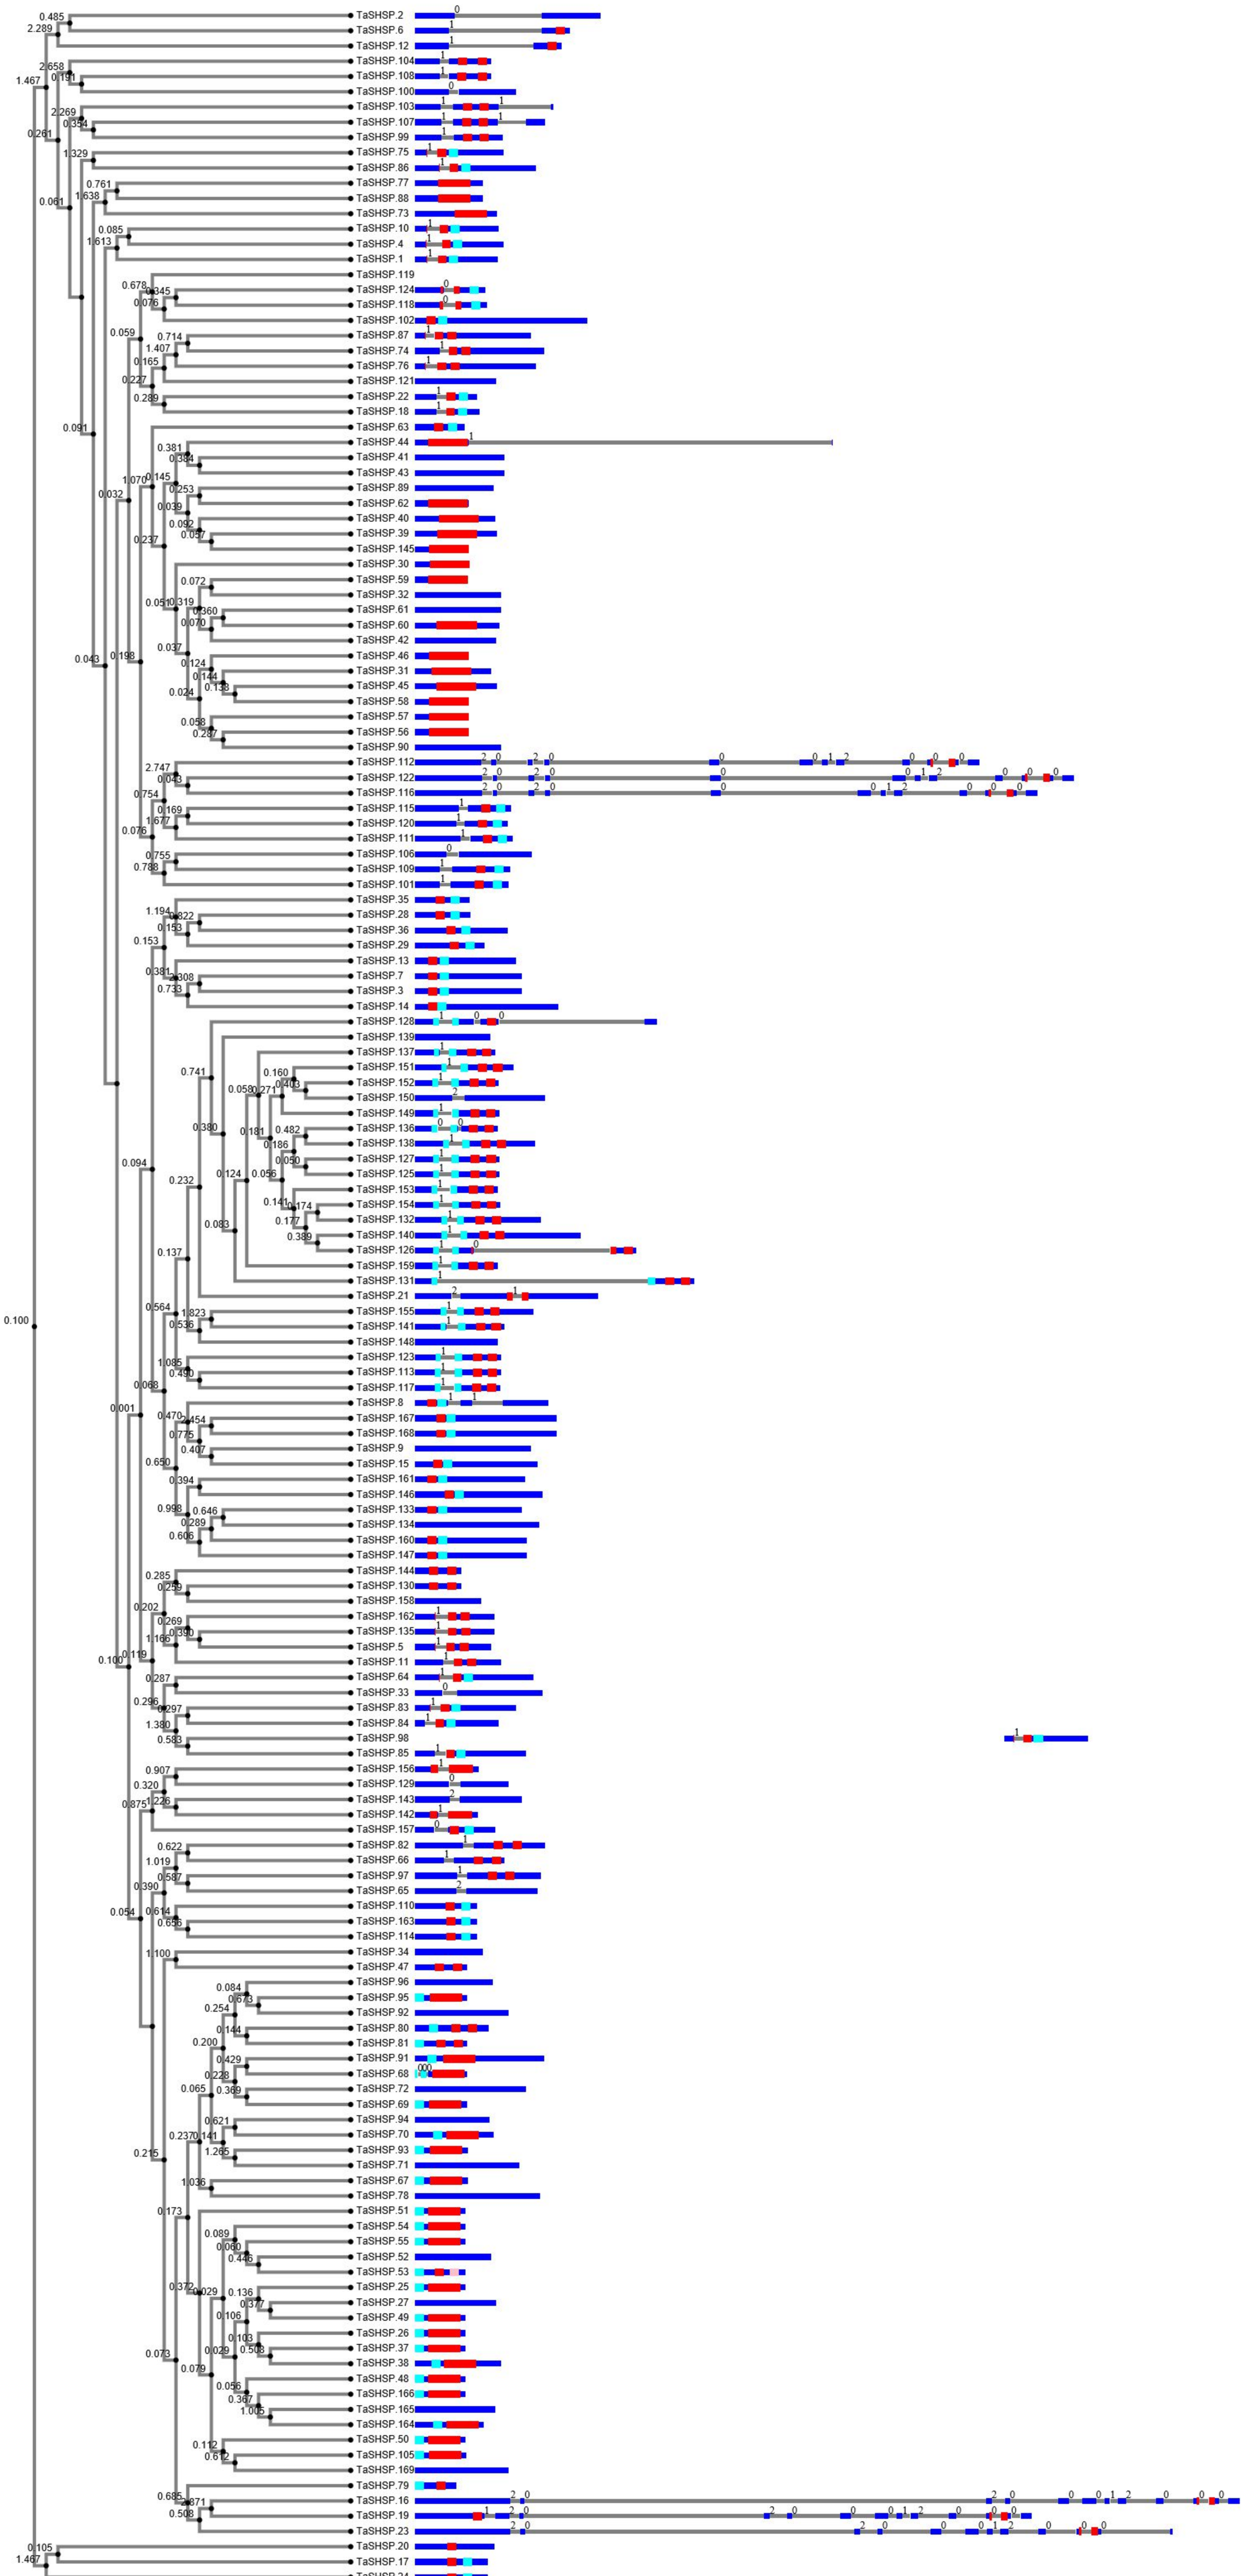

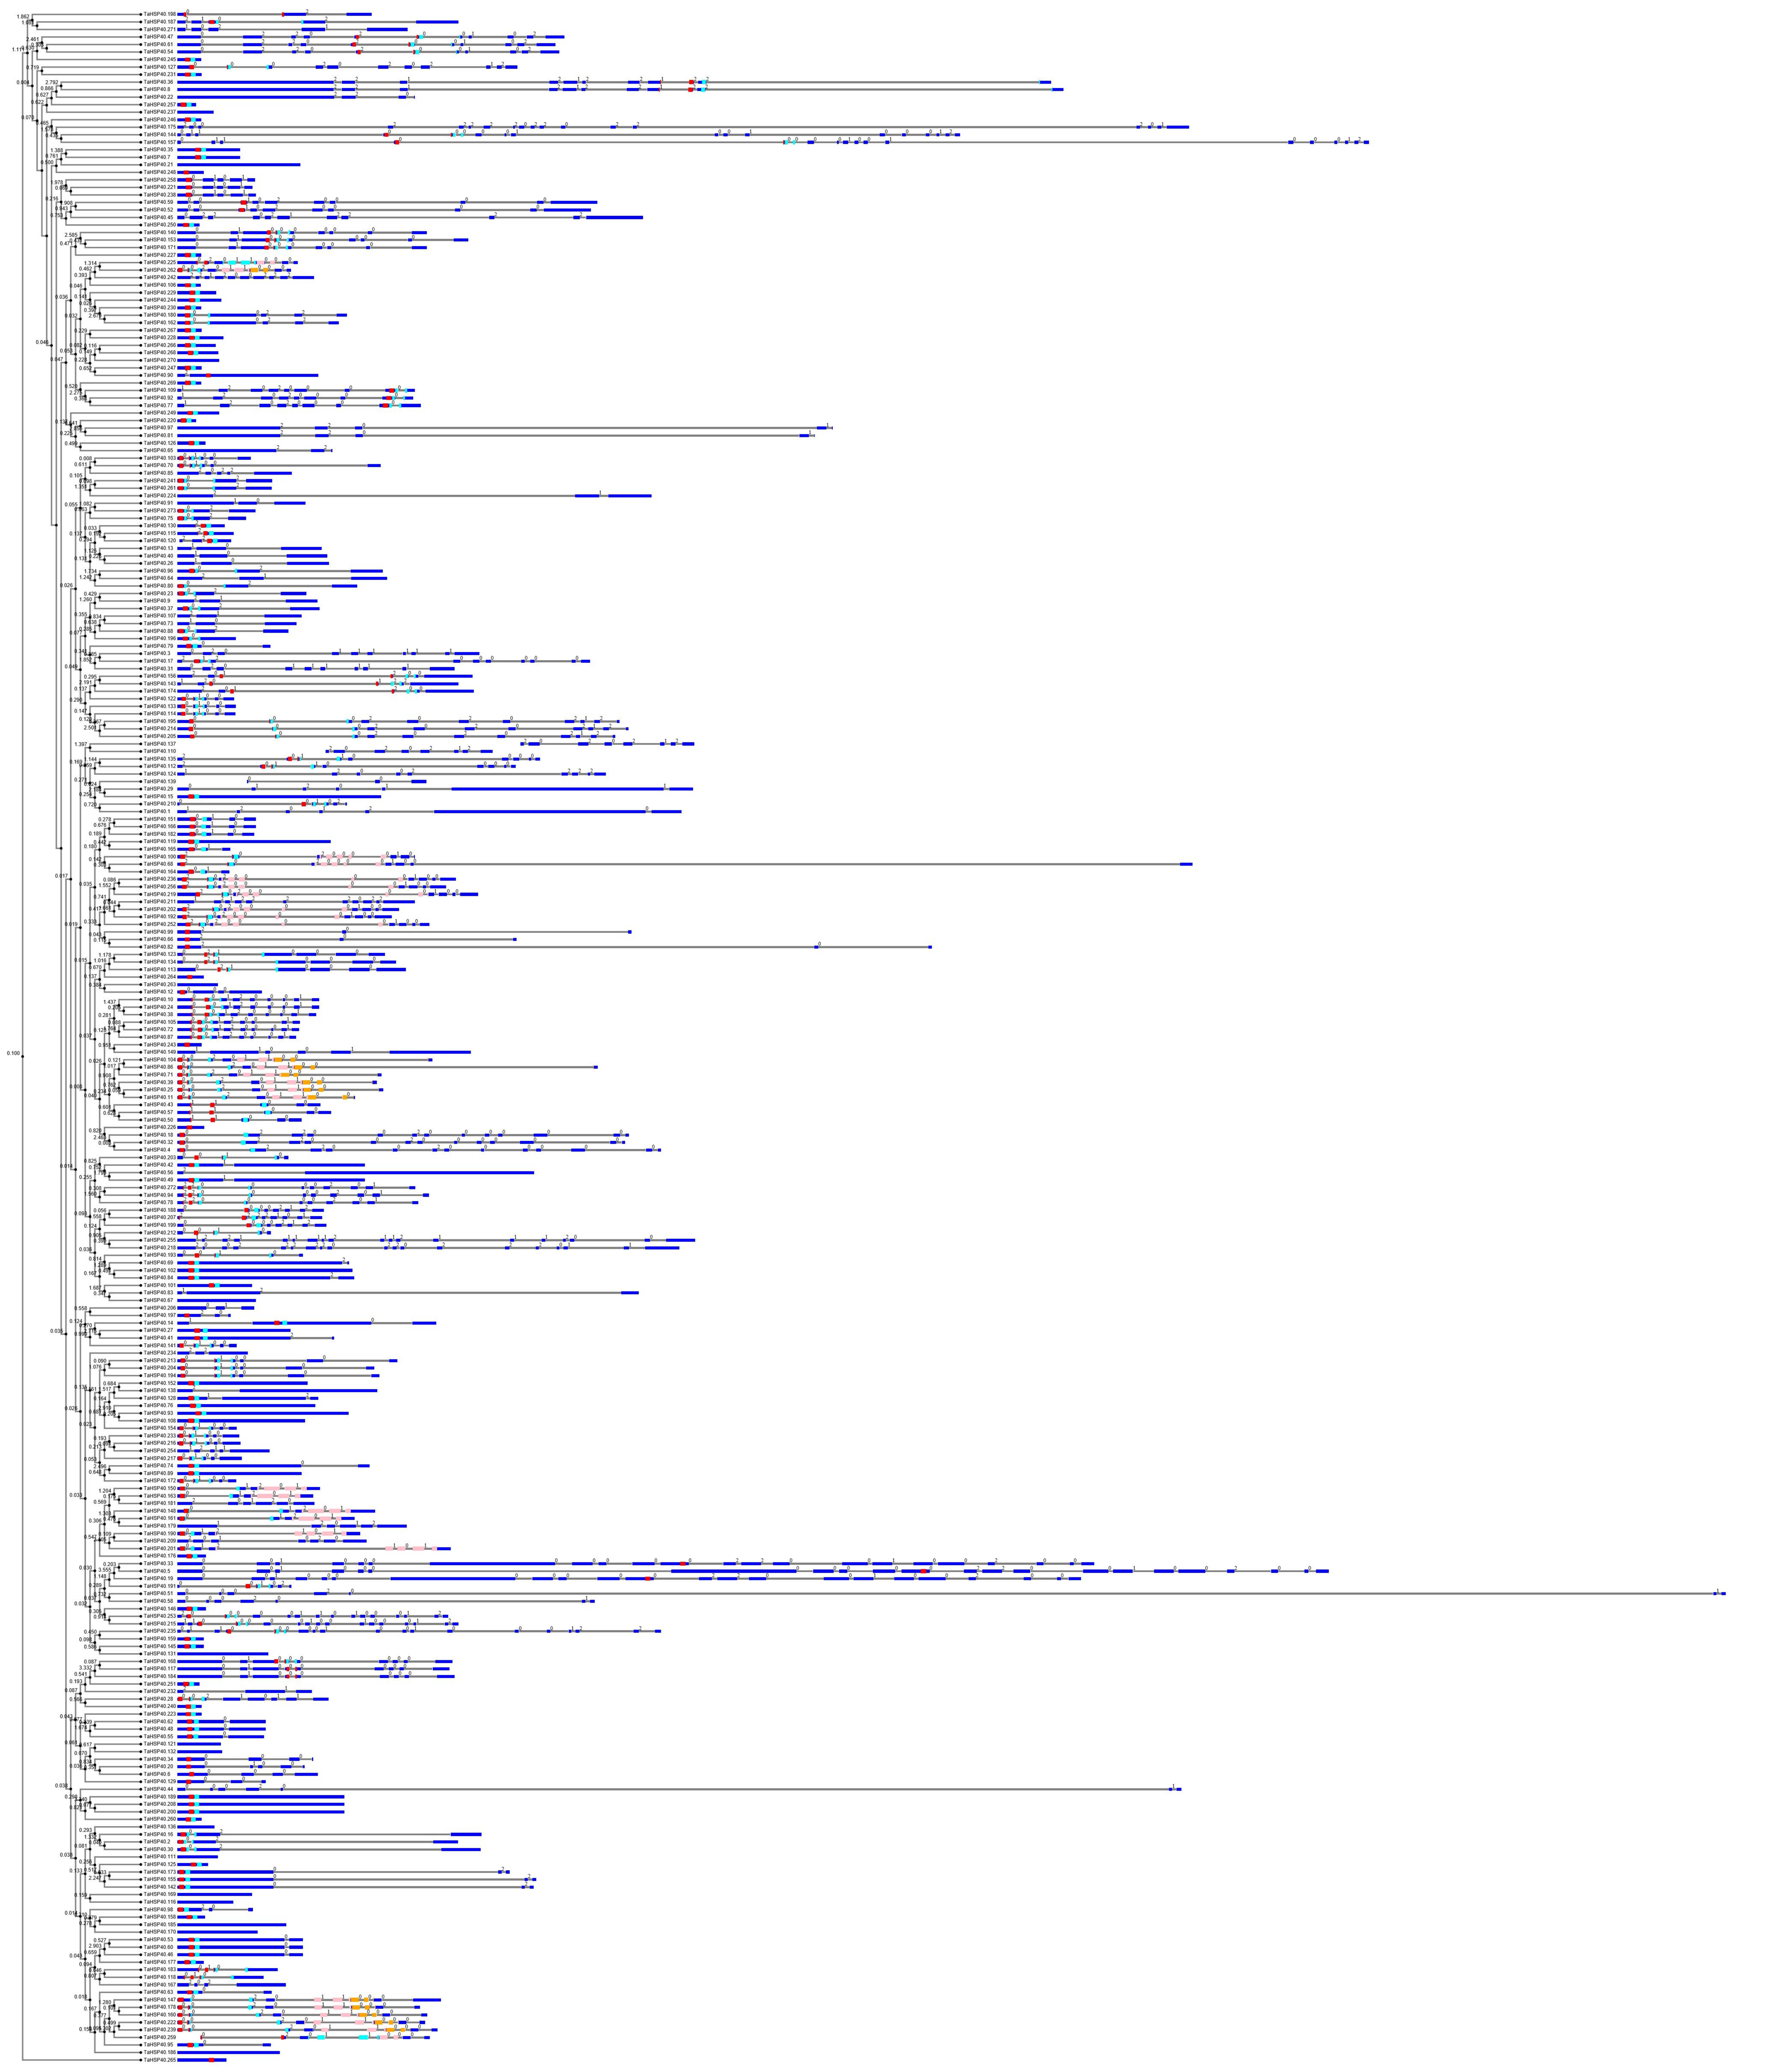



0 bp 600 bp 1200 bp 1800 bp 2400 bp 3000 bp 3600 bp 4200 bp 4800 bp 5400 bp 6000 bp 6600 bp 7200 bp 7800 bp 8400 bp 9000 bp 9600 bp 10200 bp 10800 bp 11400 bp 12000 bp 12600 bp 13200 bp 13800 bp 14400 bp 15000 bp 15600 bp 16200 bp 16800 bp

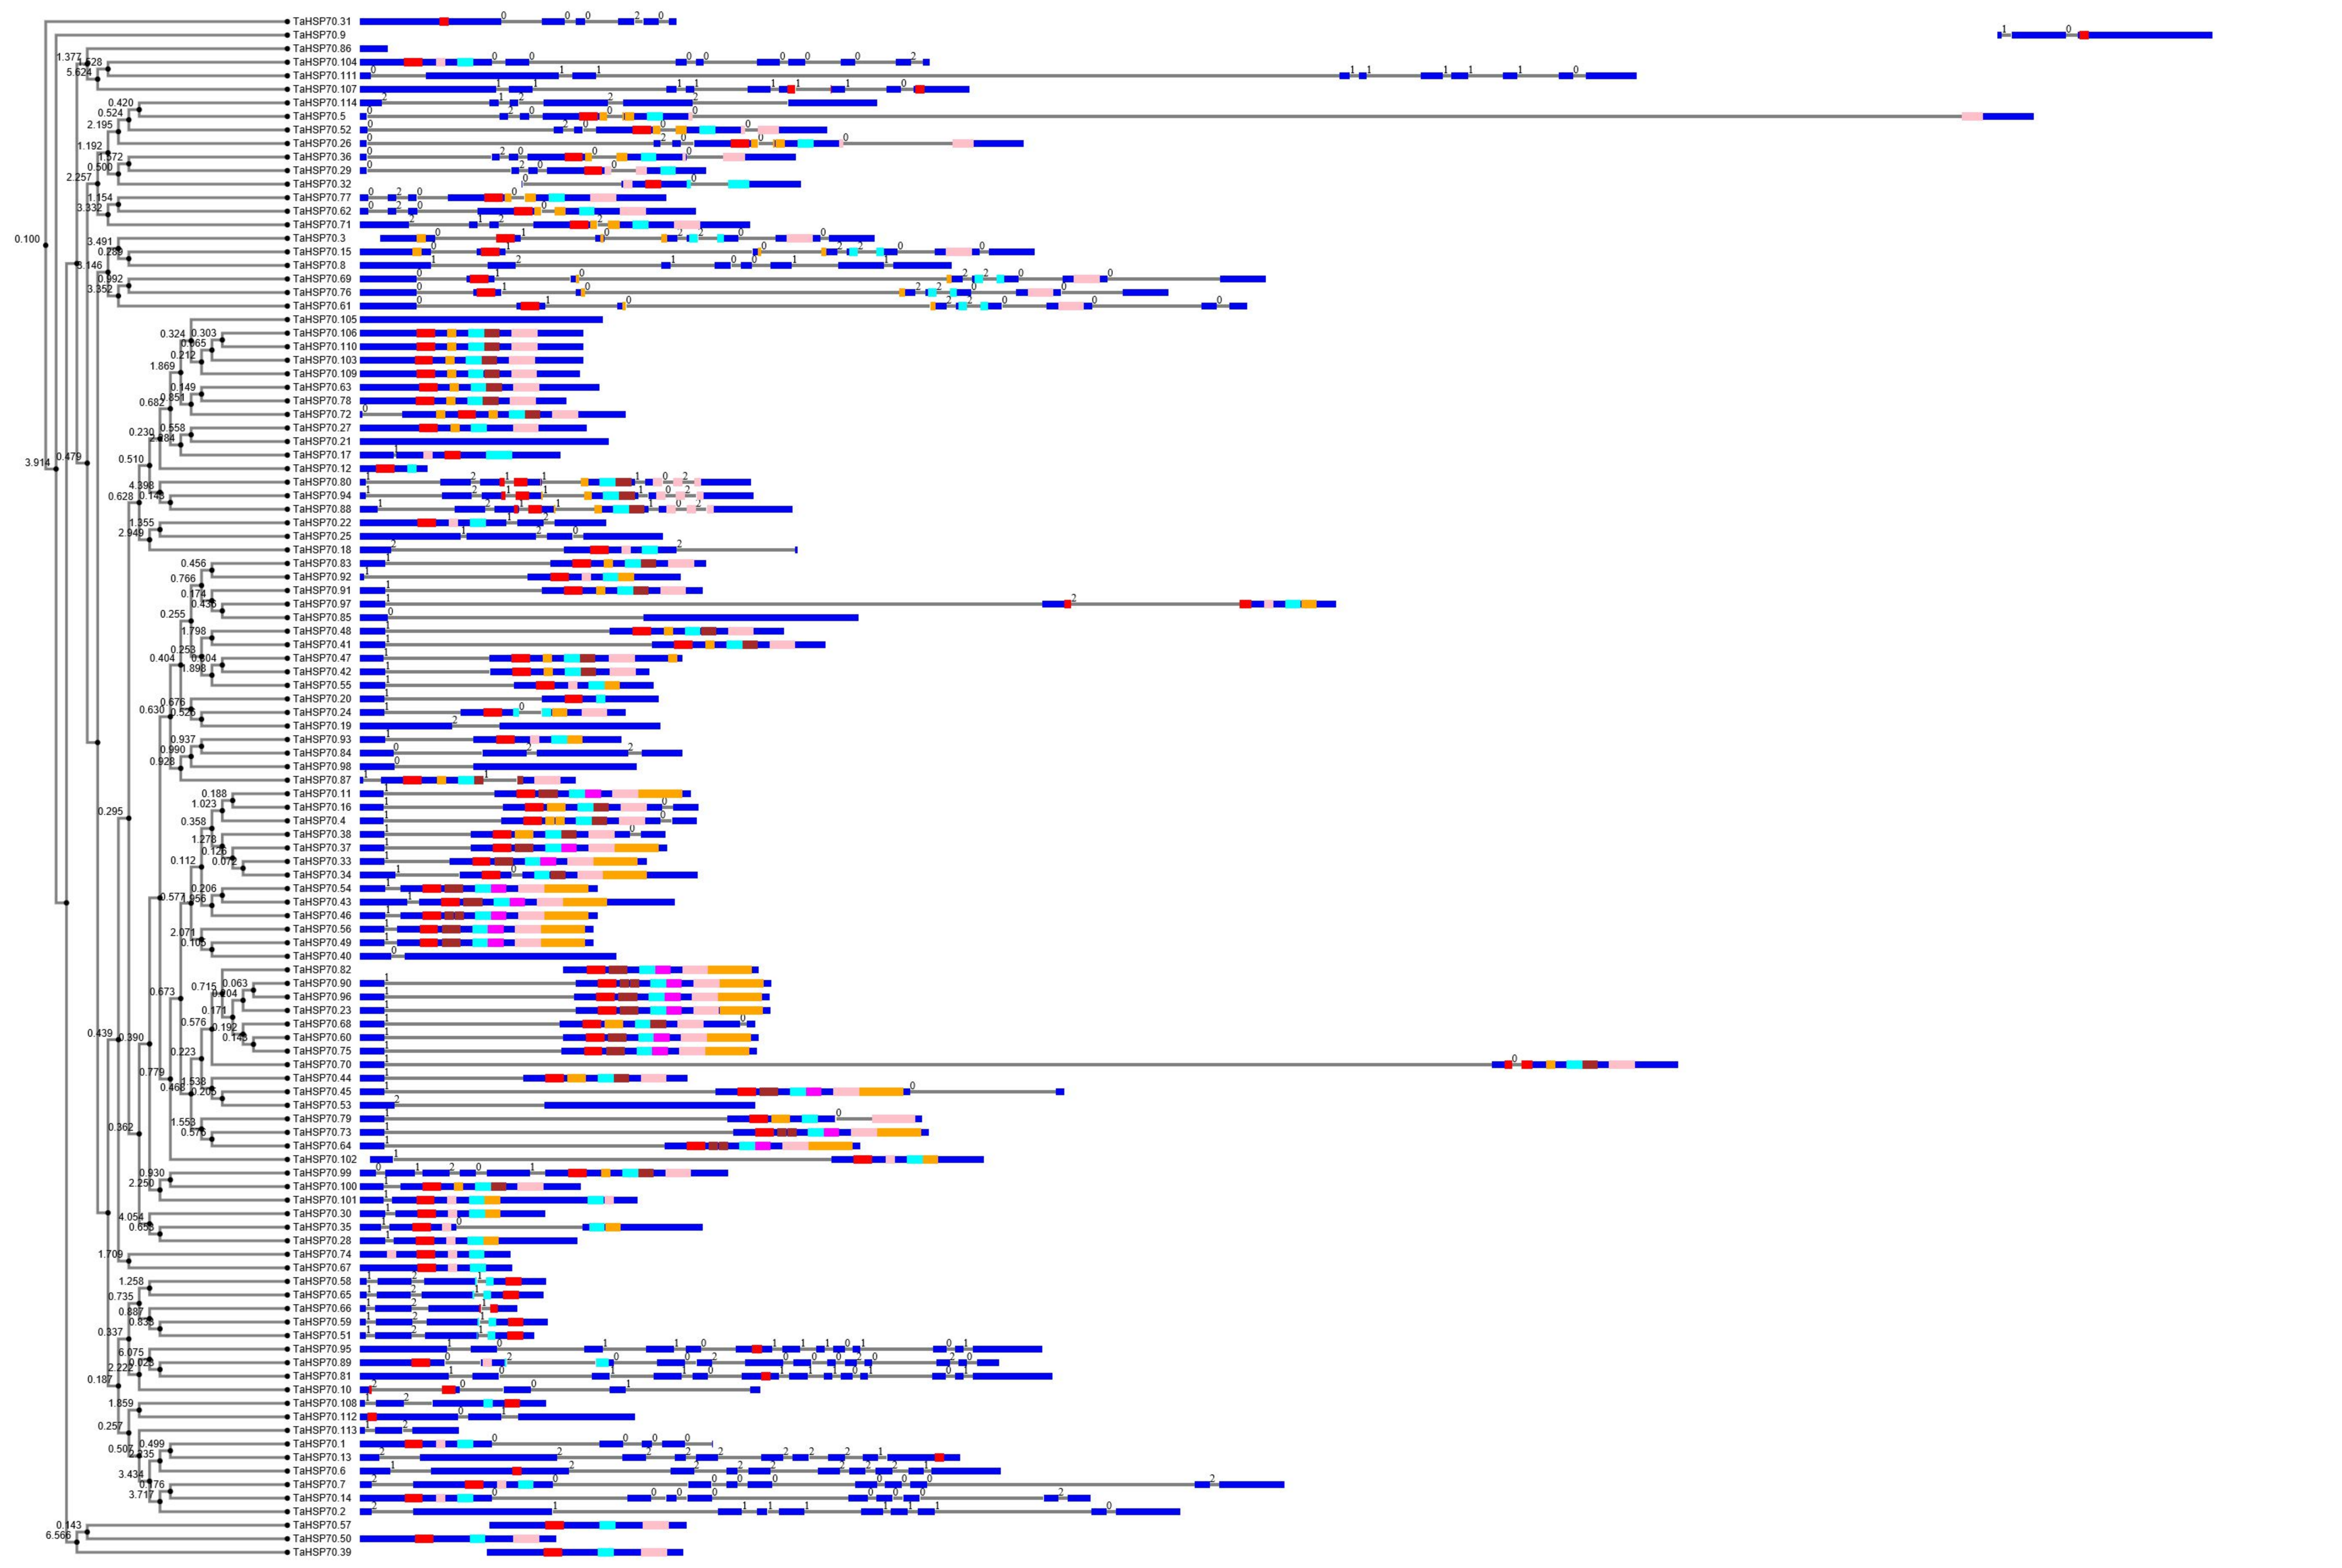

0 bp 600 bp 1200 bp 1800 bp 2400 bp 3000 bp 3600 bp 4200 bp 4800 bp 5400 bp 6000 bp 6600 bp 7200 bp

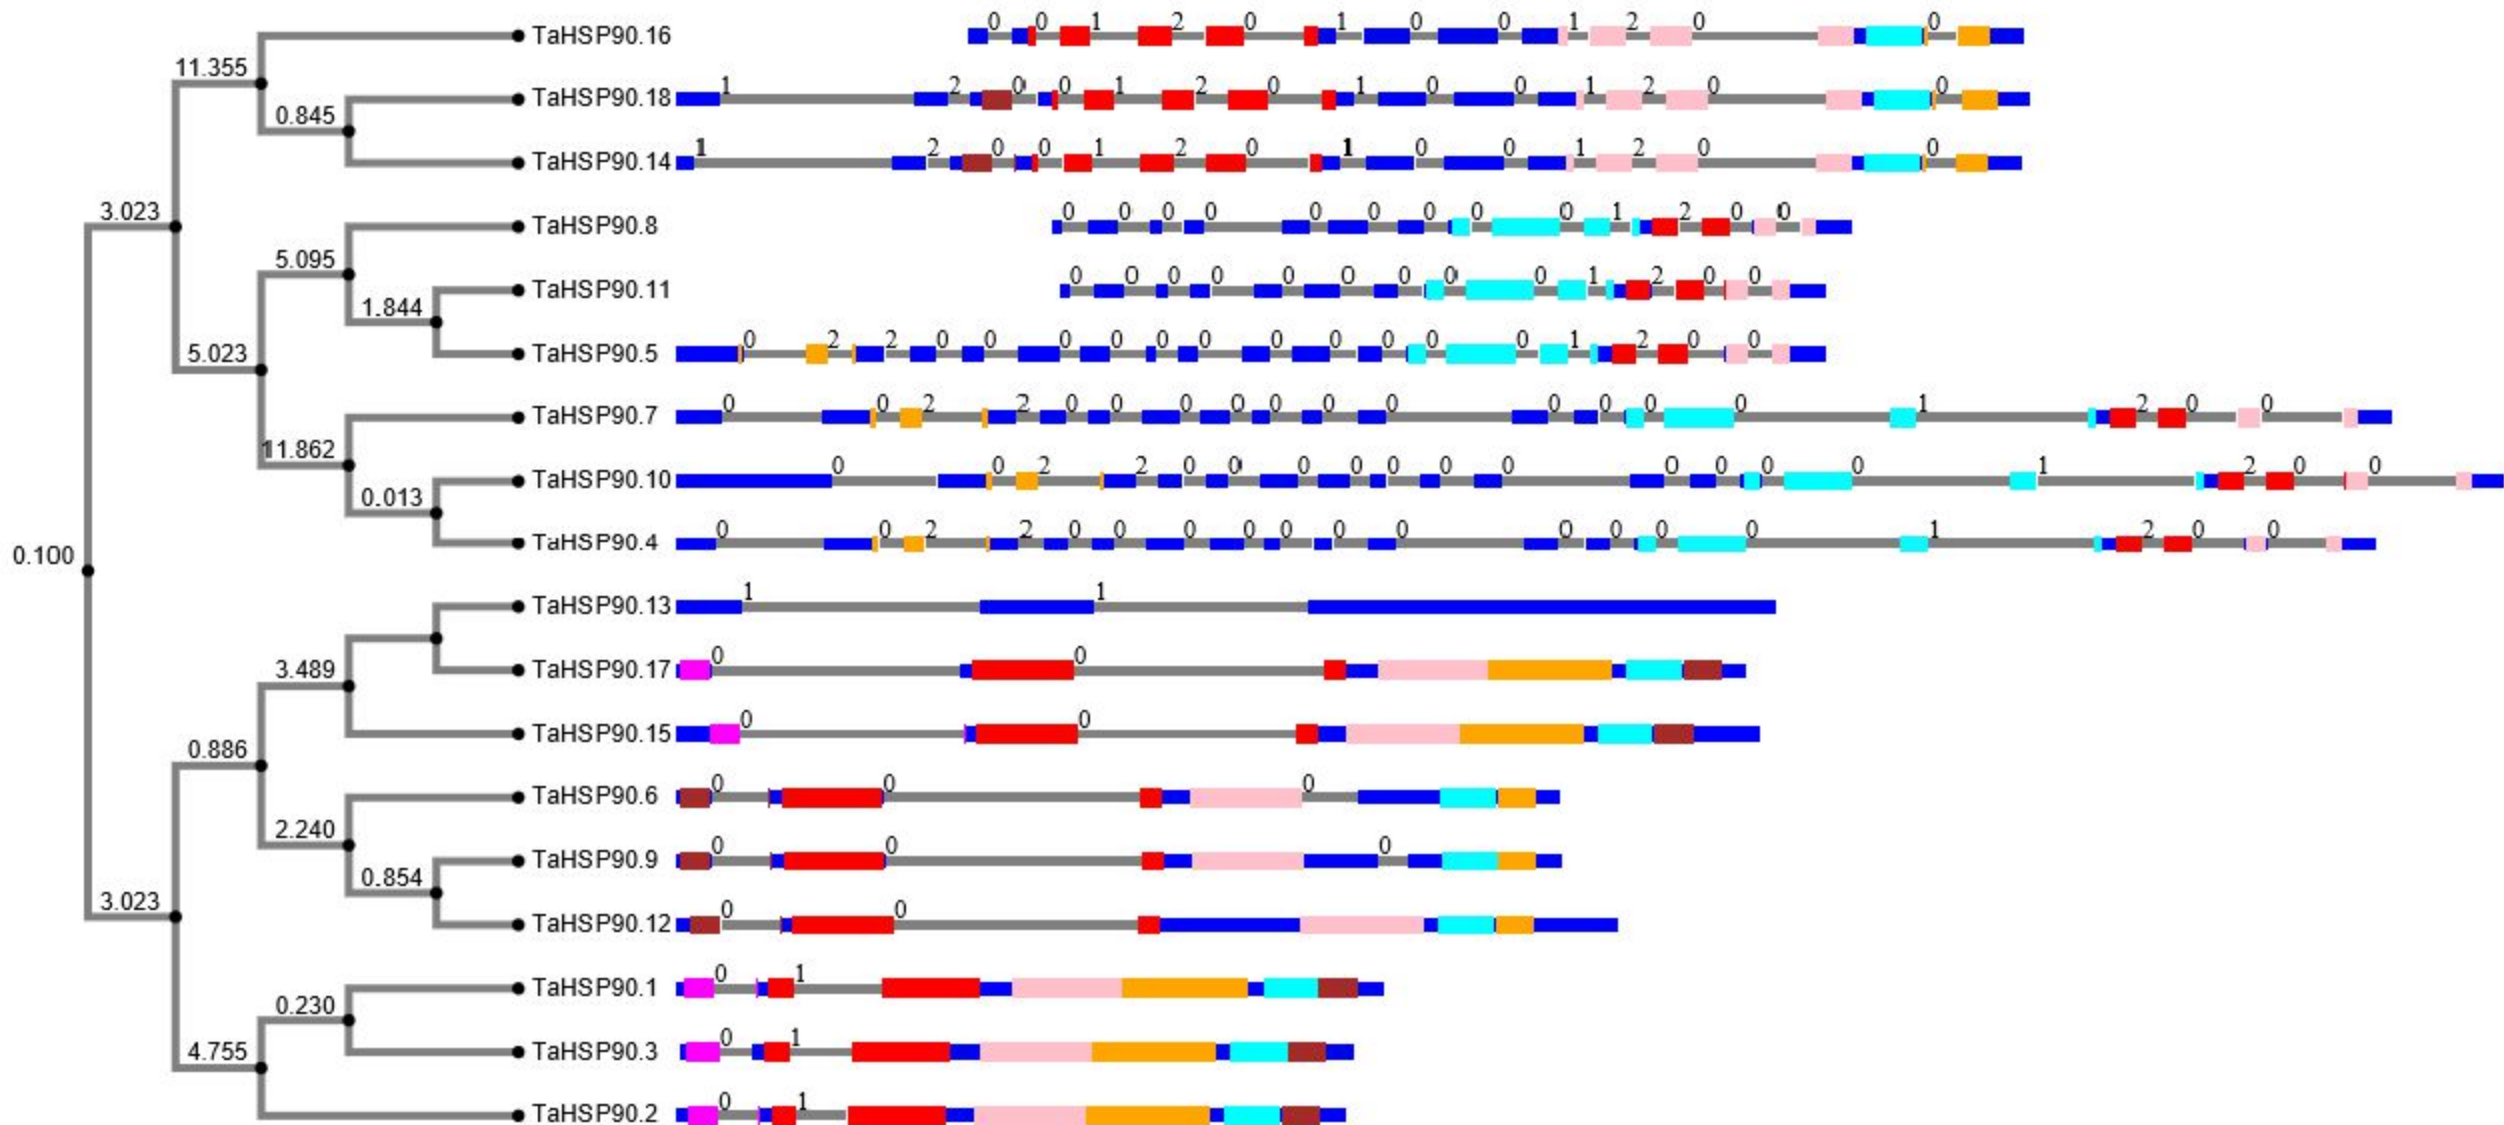

0 bp 600 bp 1200 bp 1800 bp 2400 bp 3000 bp 3600 bp 4200 bp 4800 bp 5400 bp 6000 bp 6600 bp 7200 bp 7800 bp 8400 bp 9000 bp 9600 bp 10200 bp 10800 bp 11400 bp 12000 bp 12600 bp 13200 bp 13800 bp 14400 bp 15000 bp 15600 bp 16200 bp 16800 bp 17400 bp 18000 bp 18600 bp 19200 bp 19800 bp 20400 bp 21000 bp 21600 bp 22200 bp 22800 bp 23400 bp 24000 bp 24600 bp 25200 bp 25800 bp

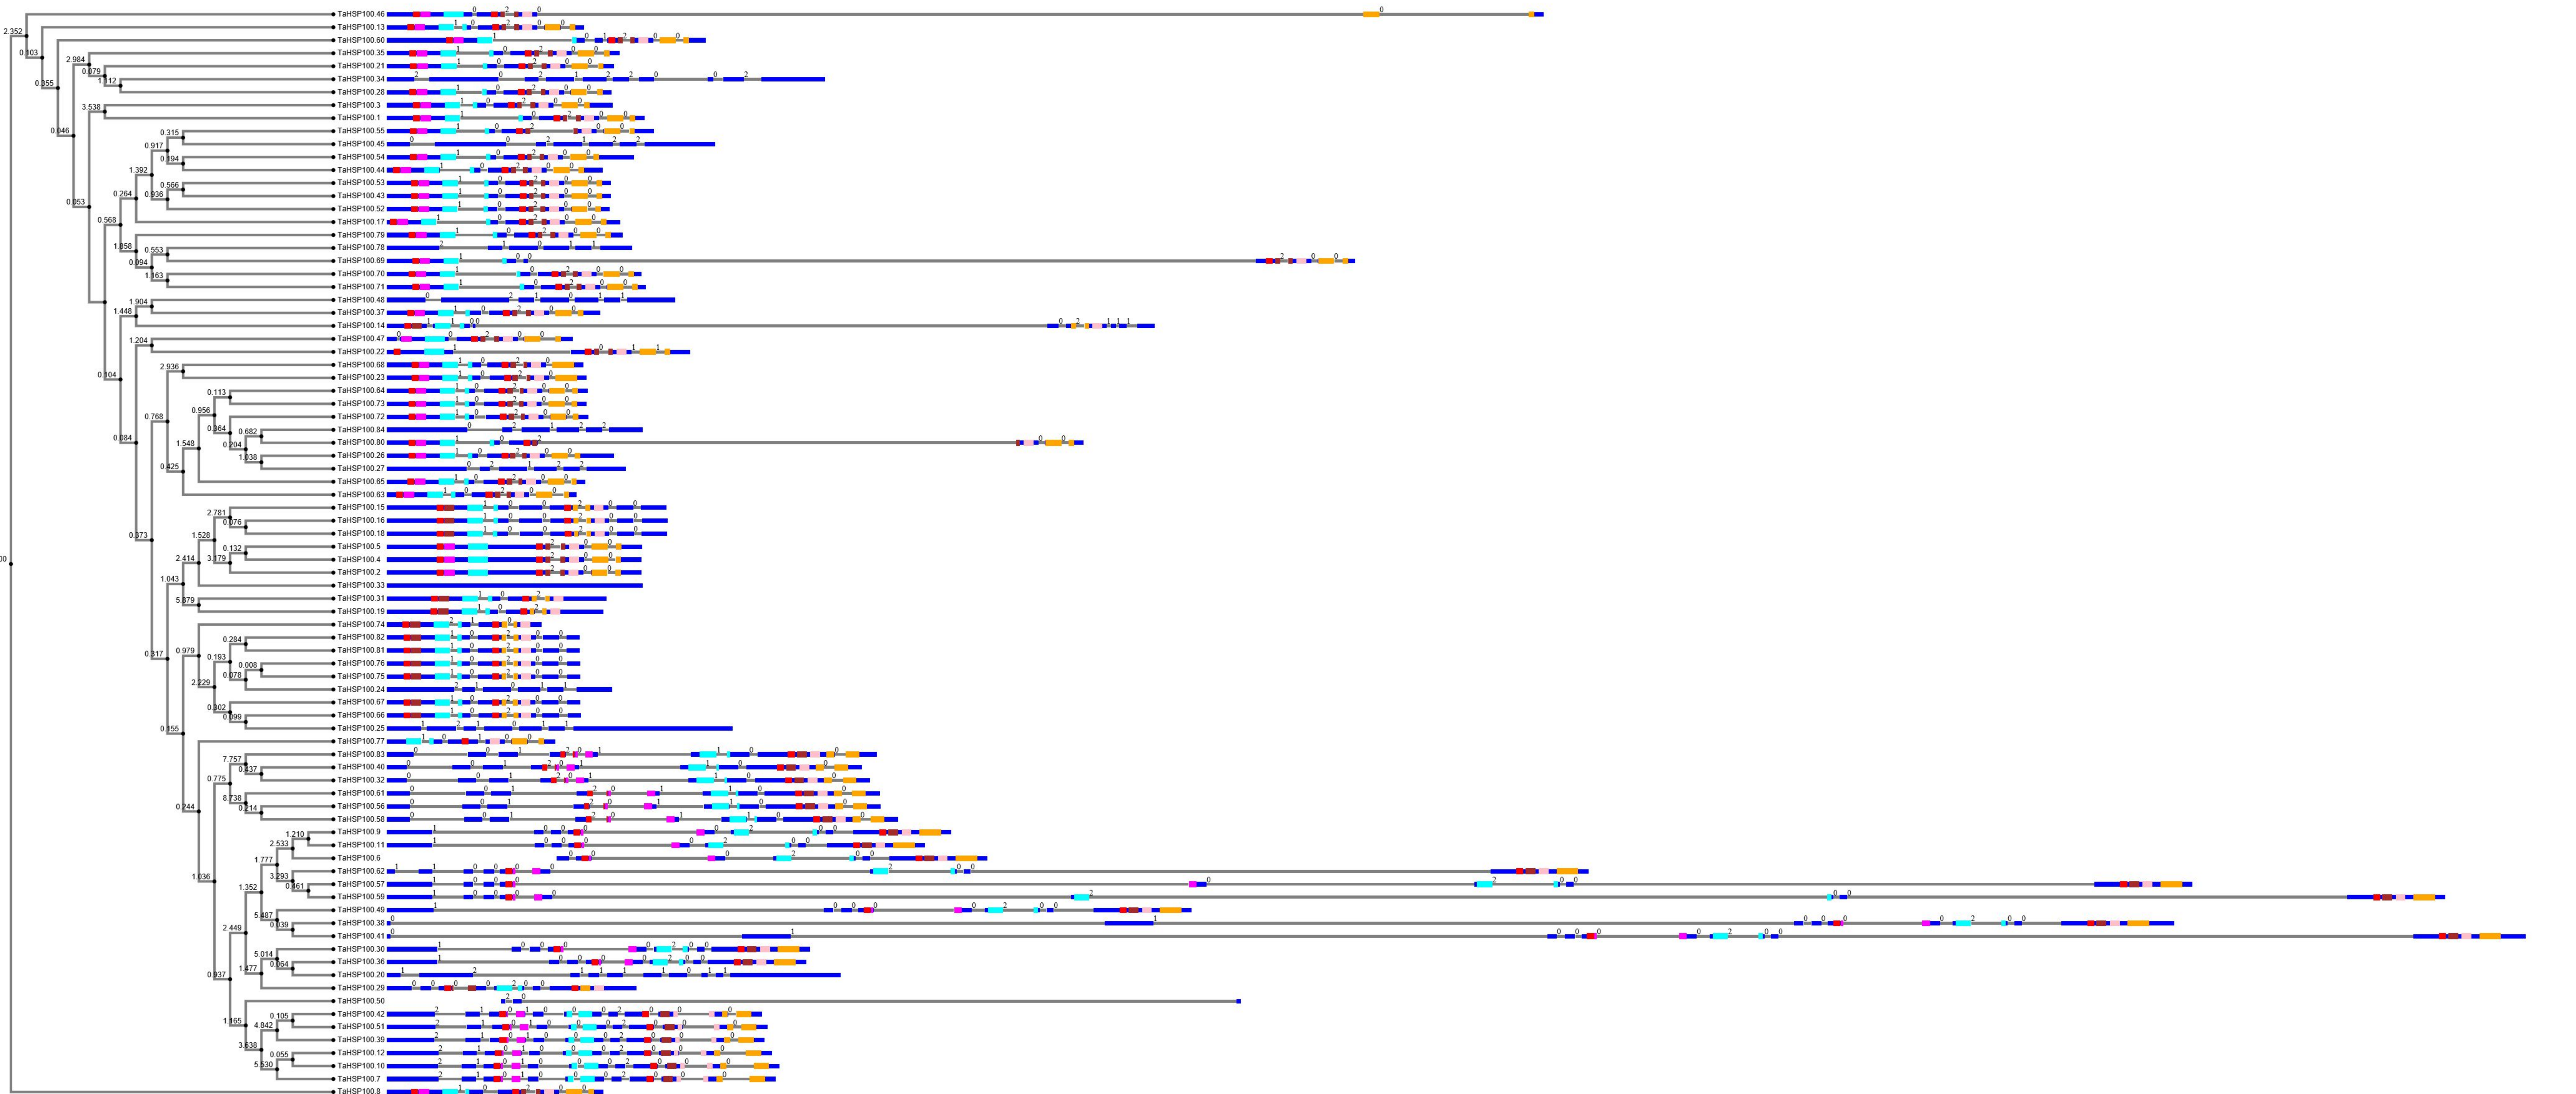



**A**

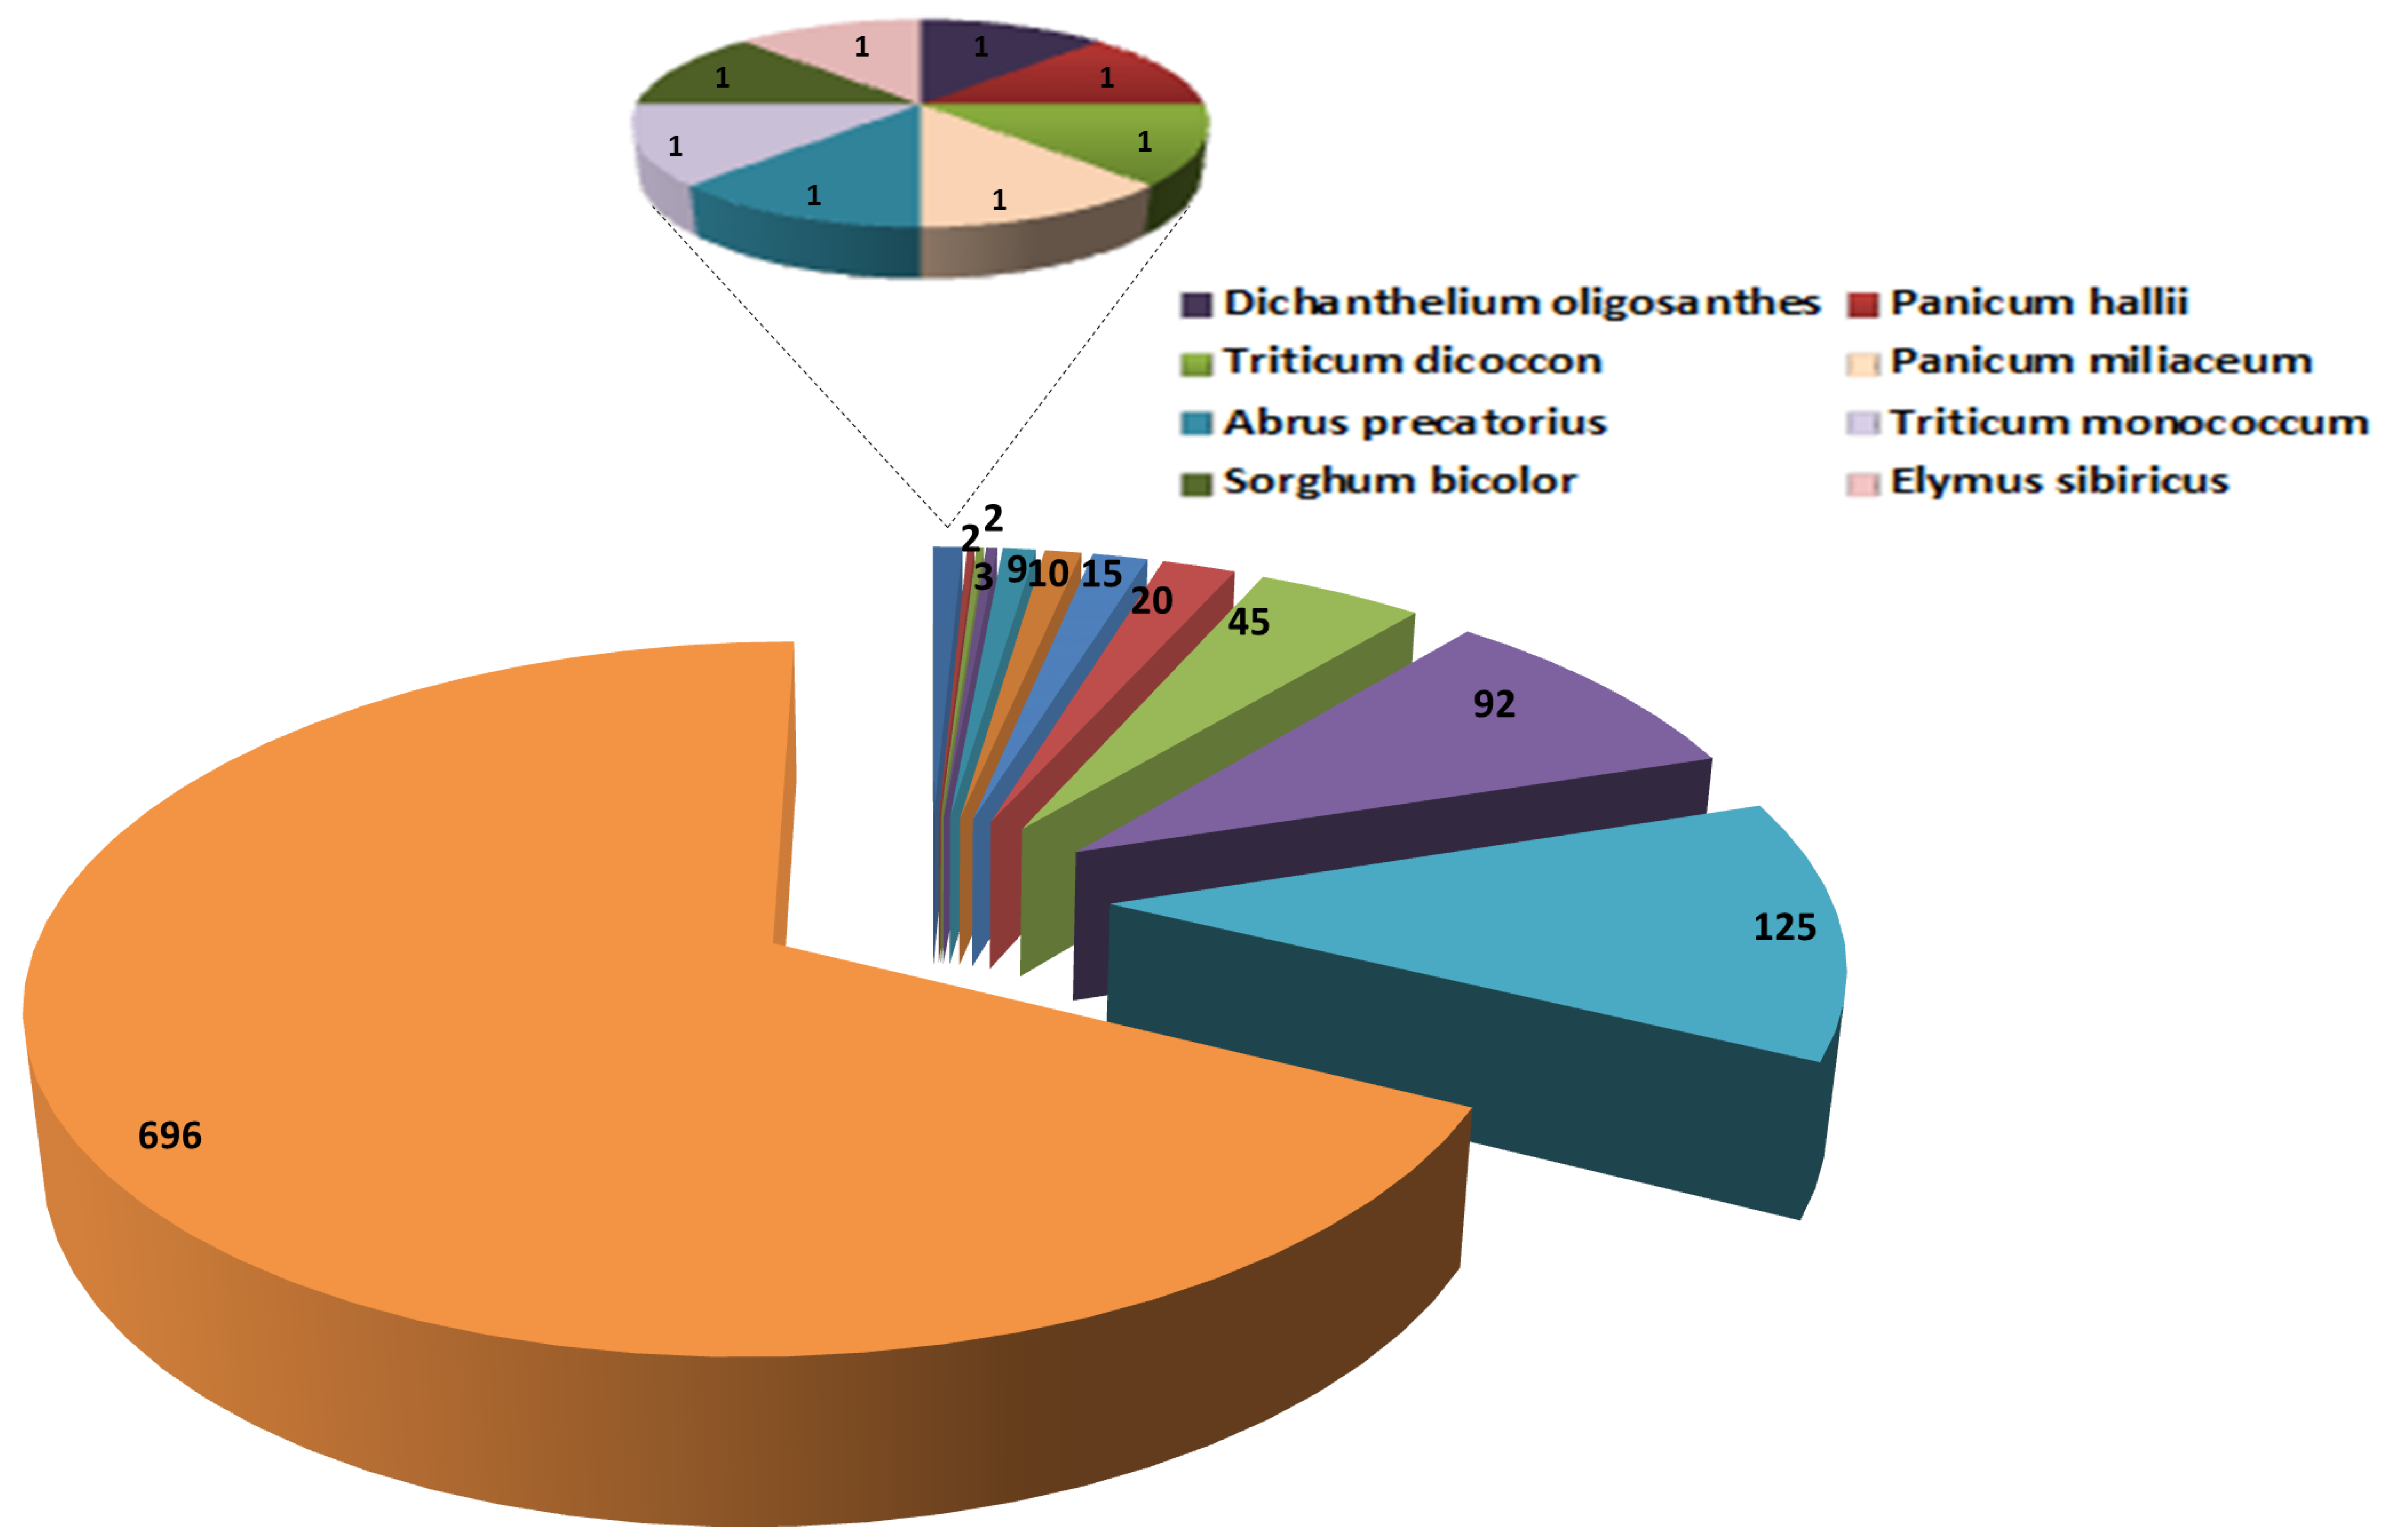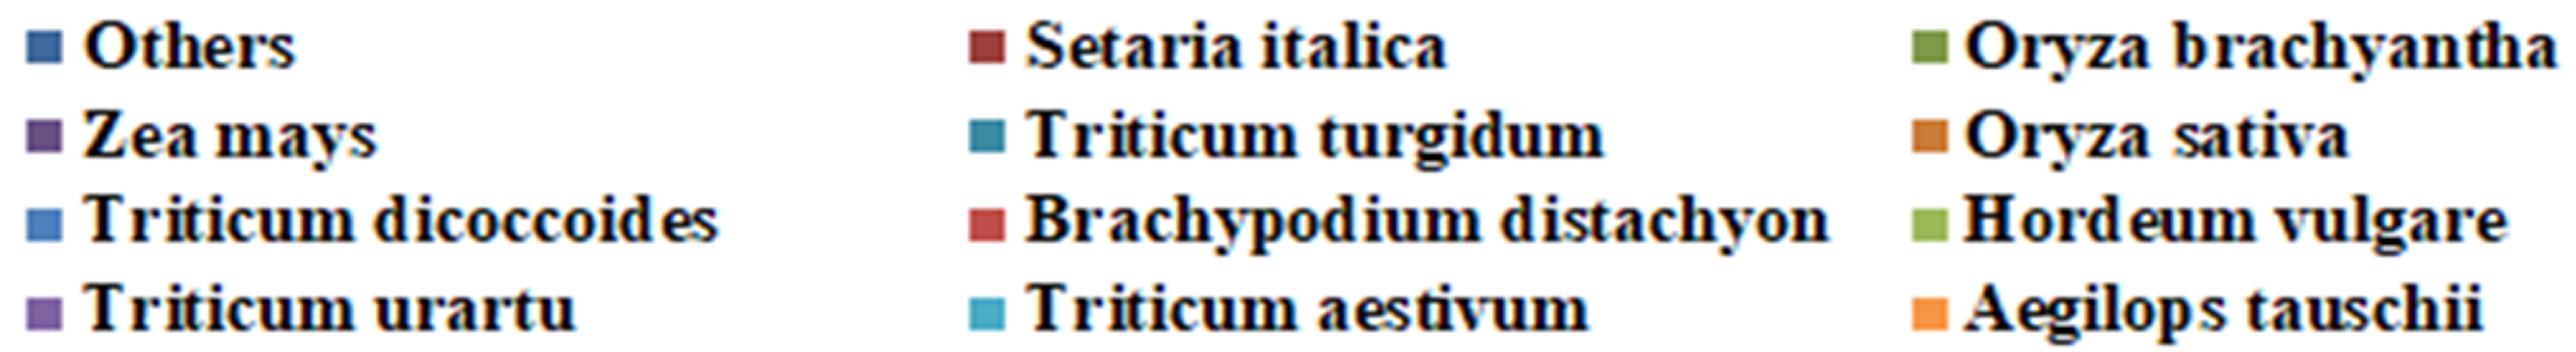

**B**

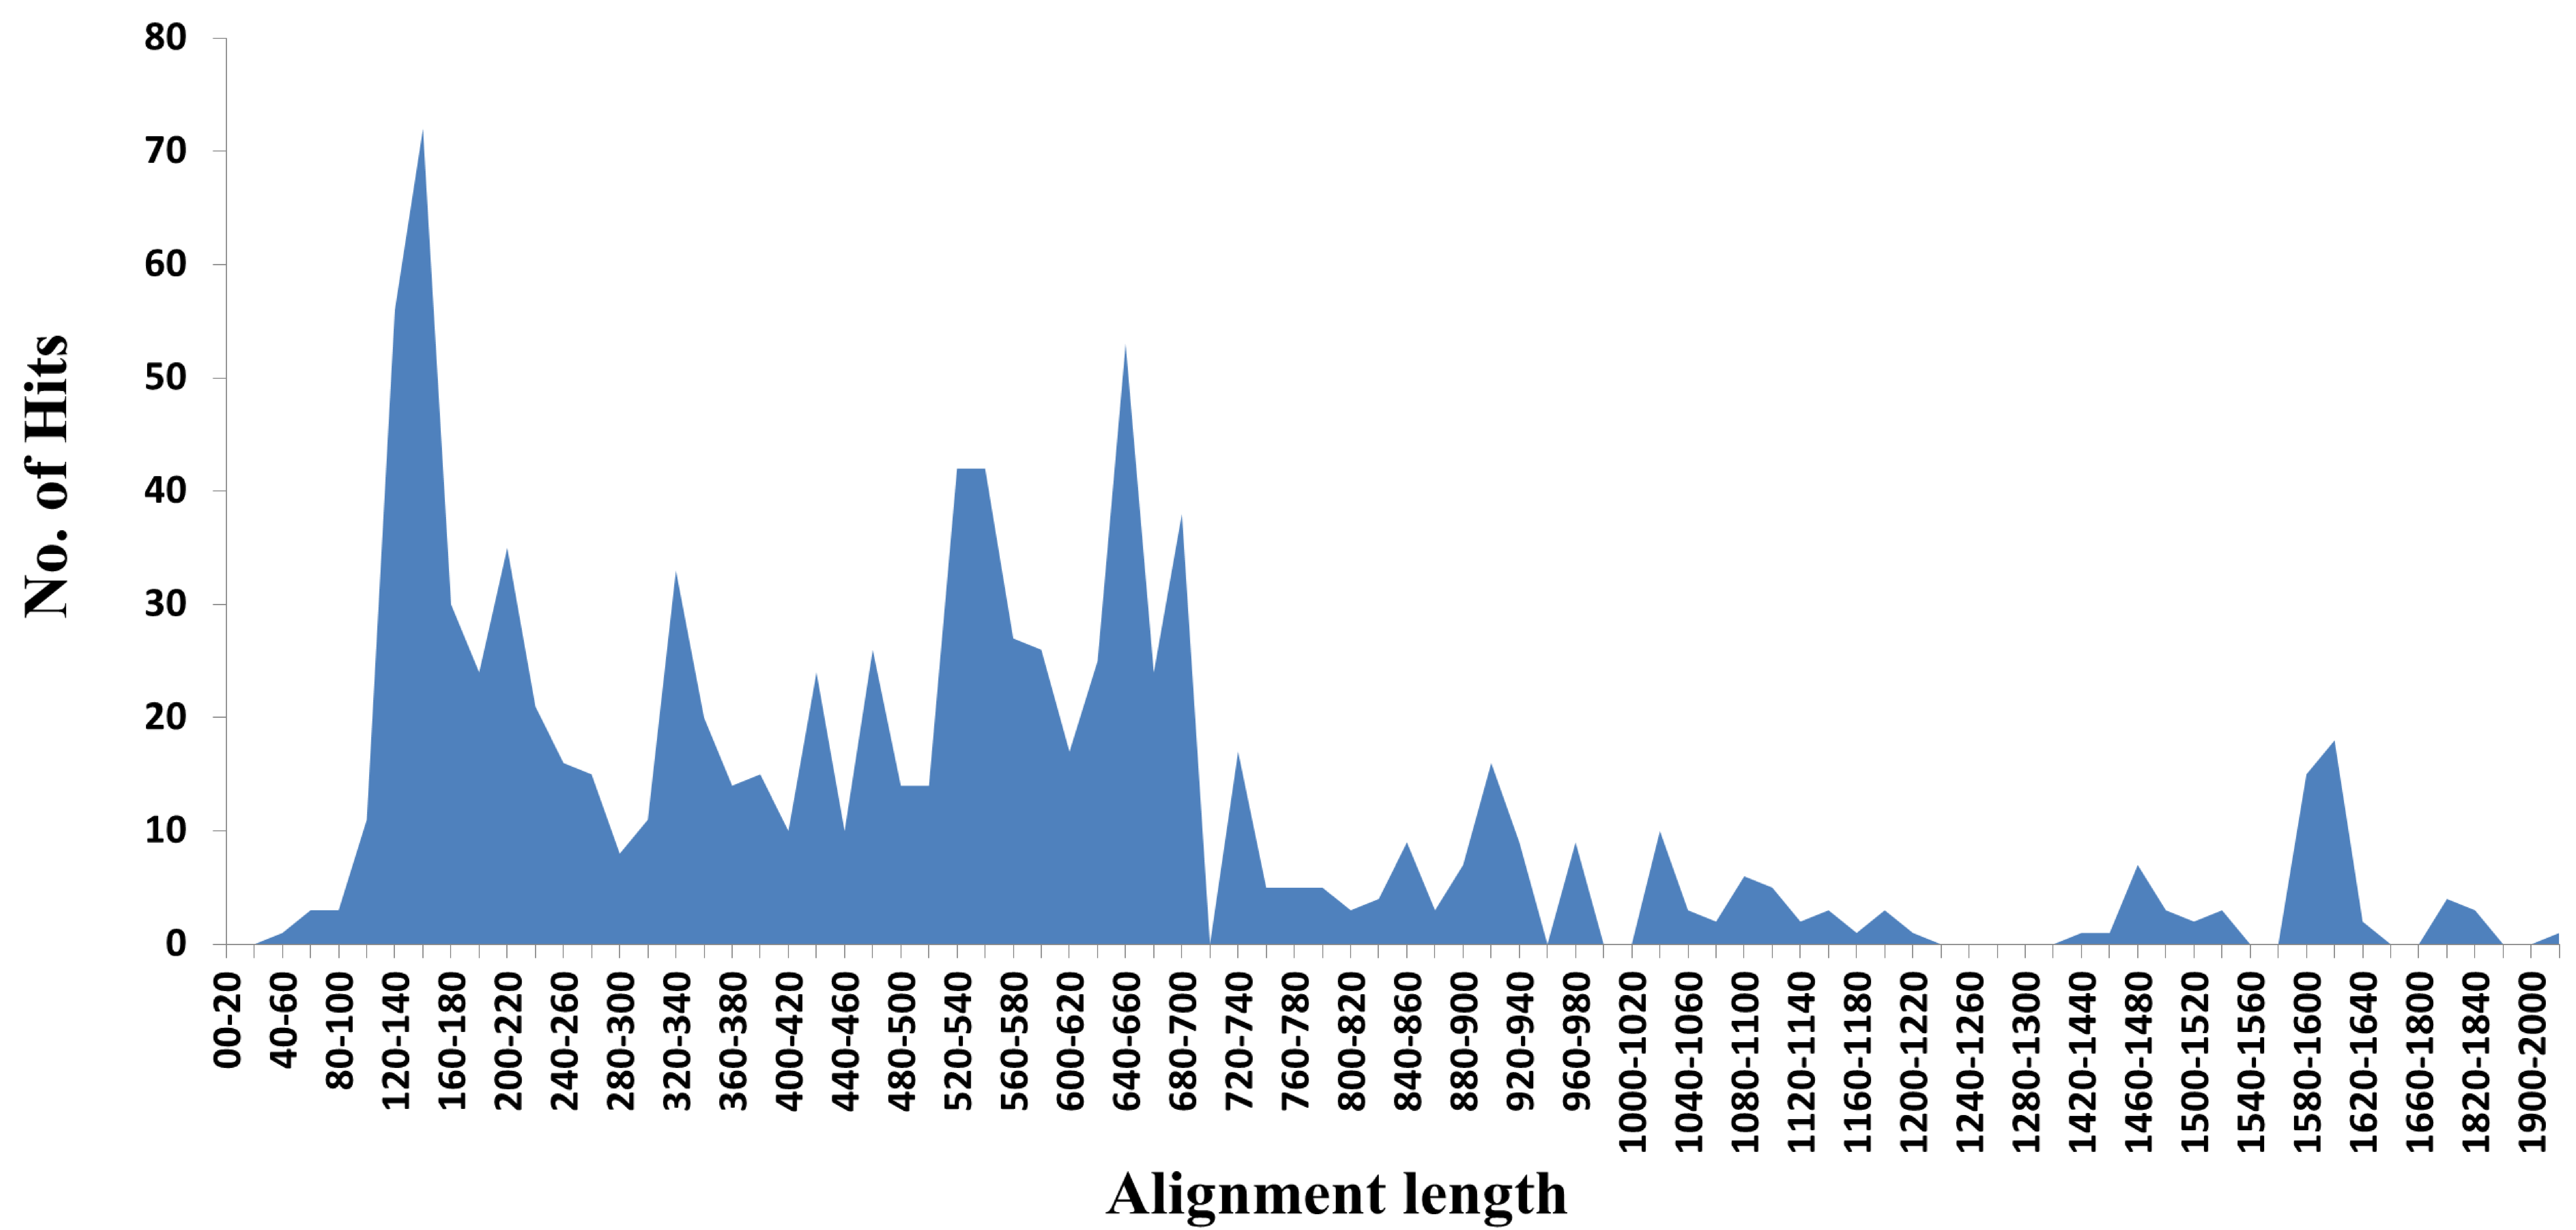

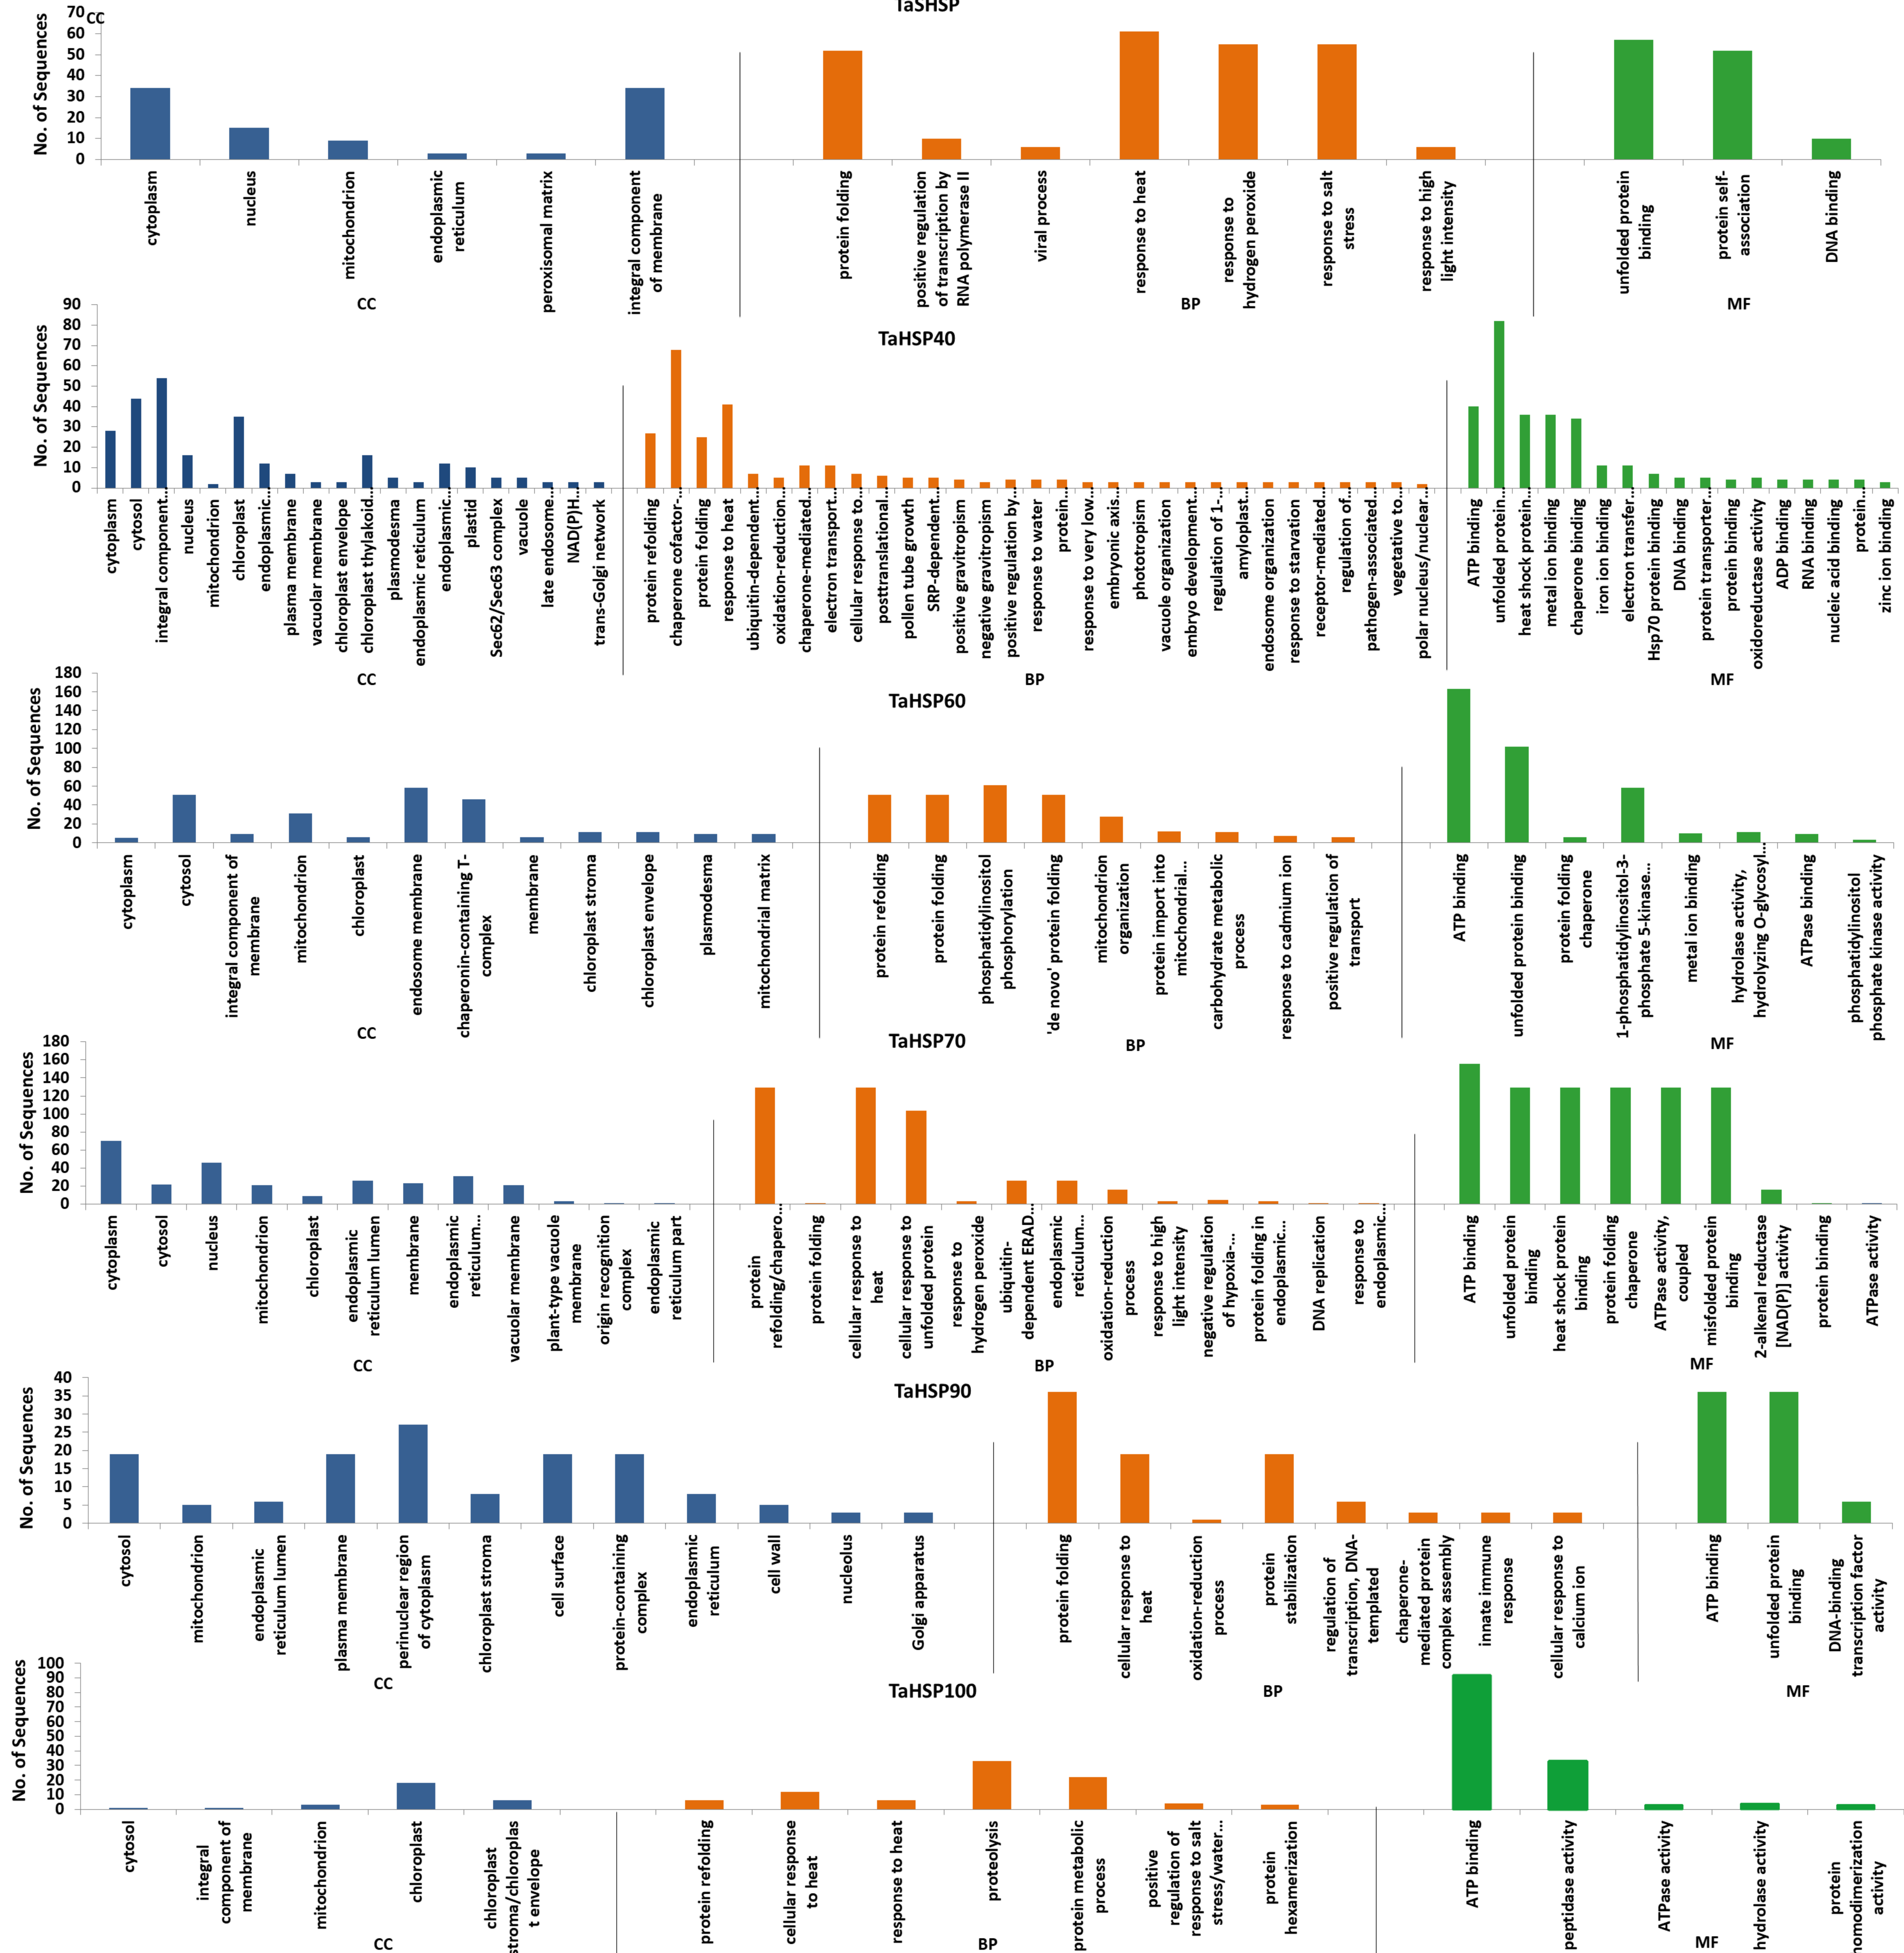

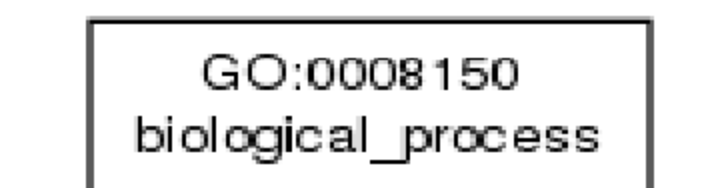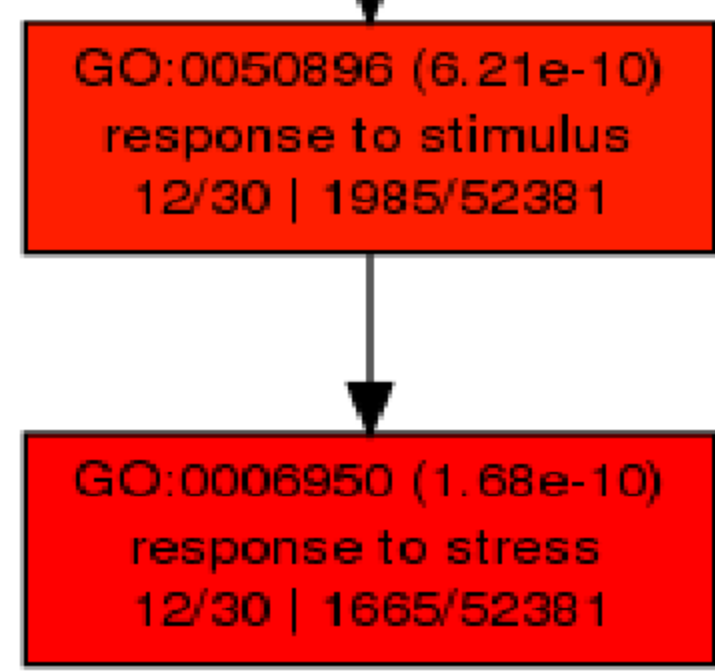

*TaSHSP*

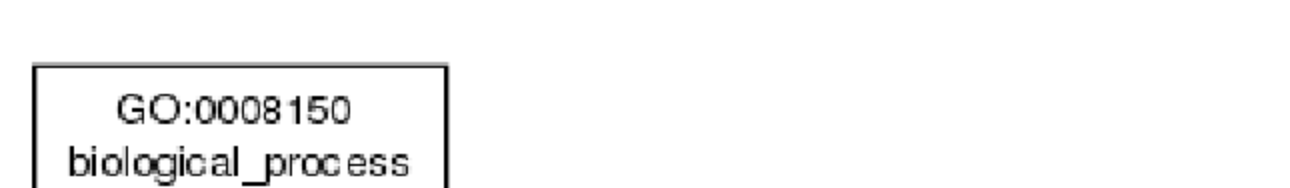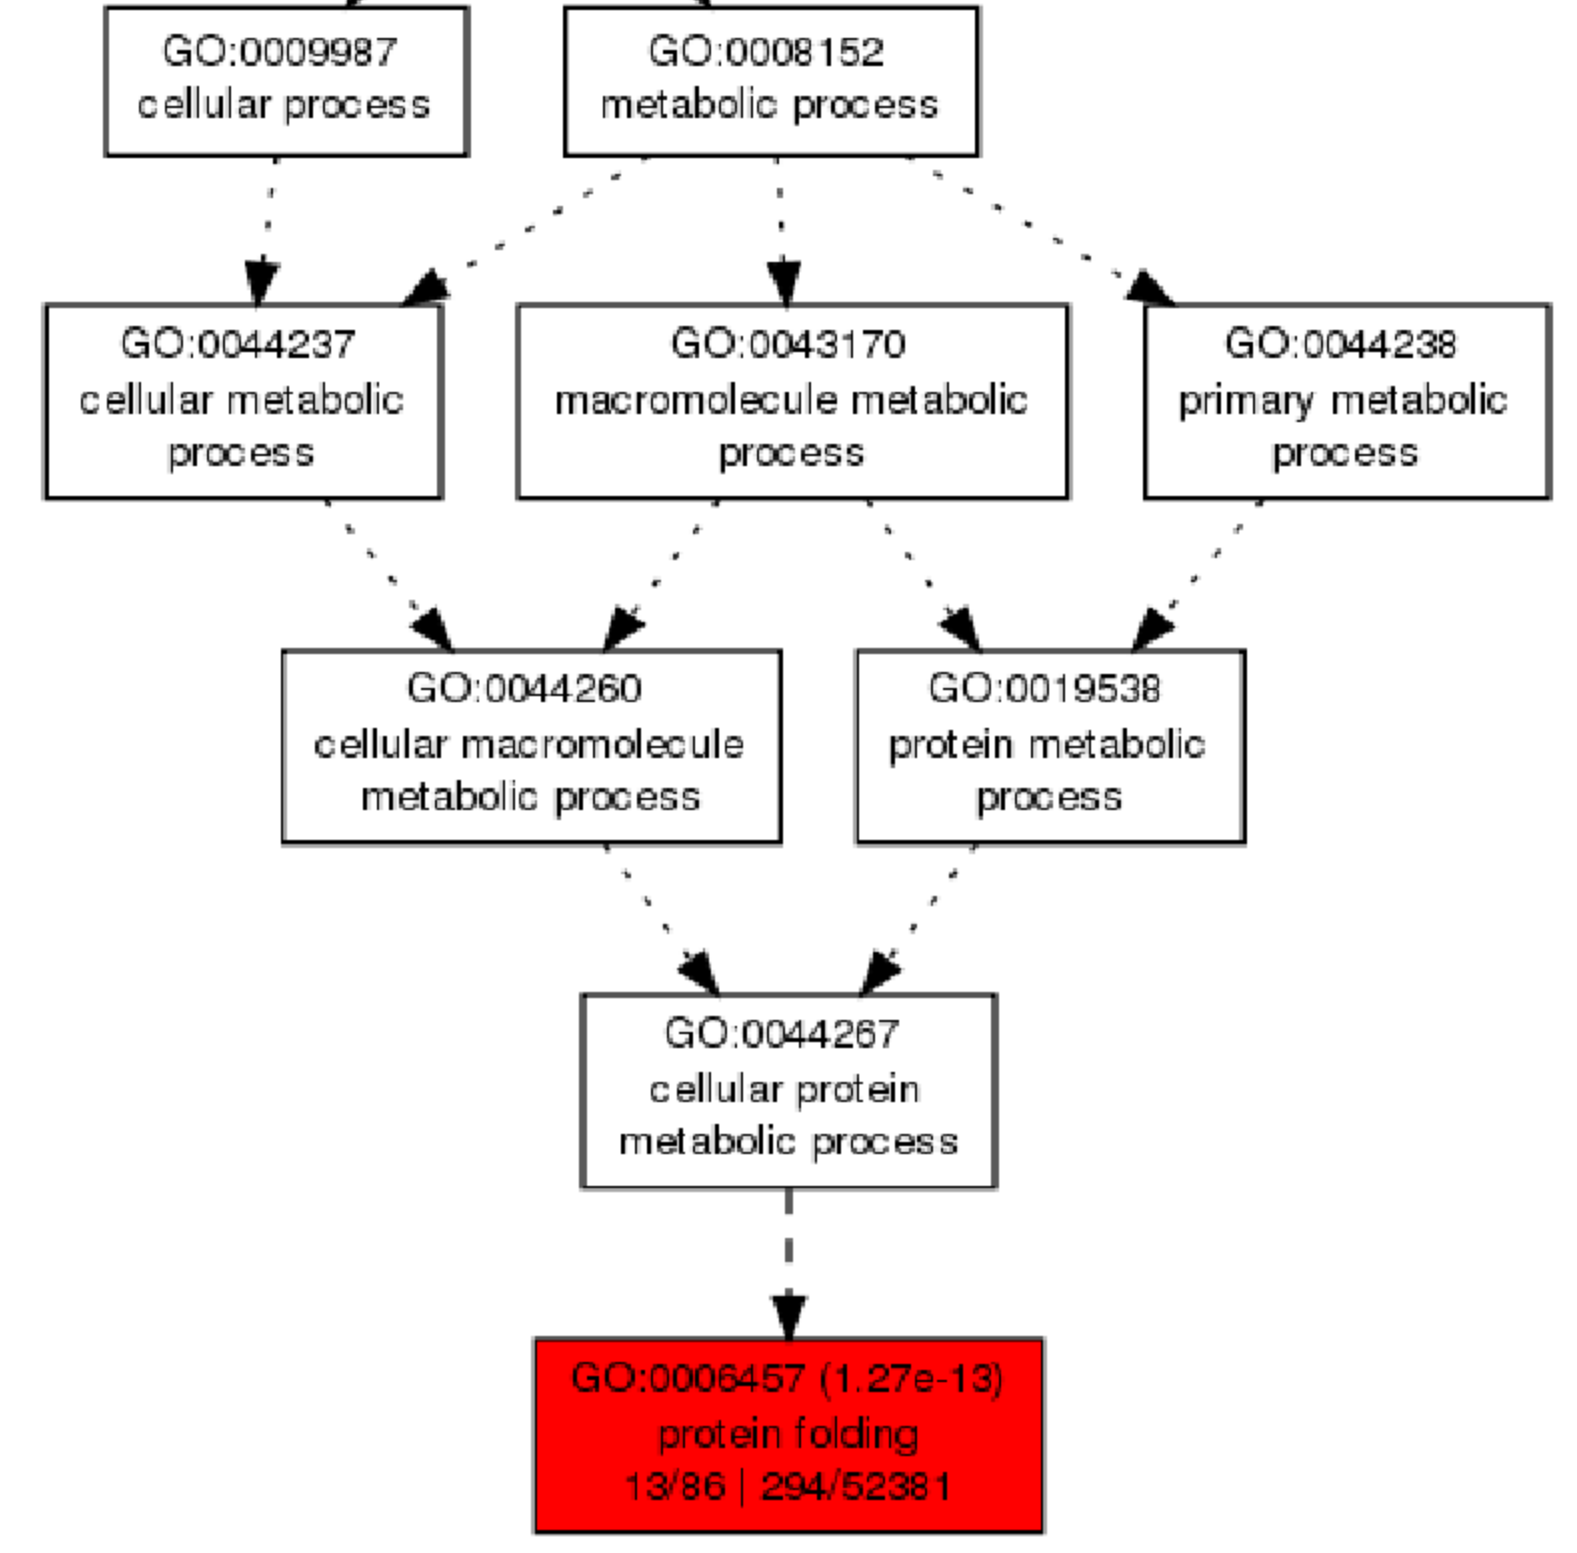

*TaHSP40*

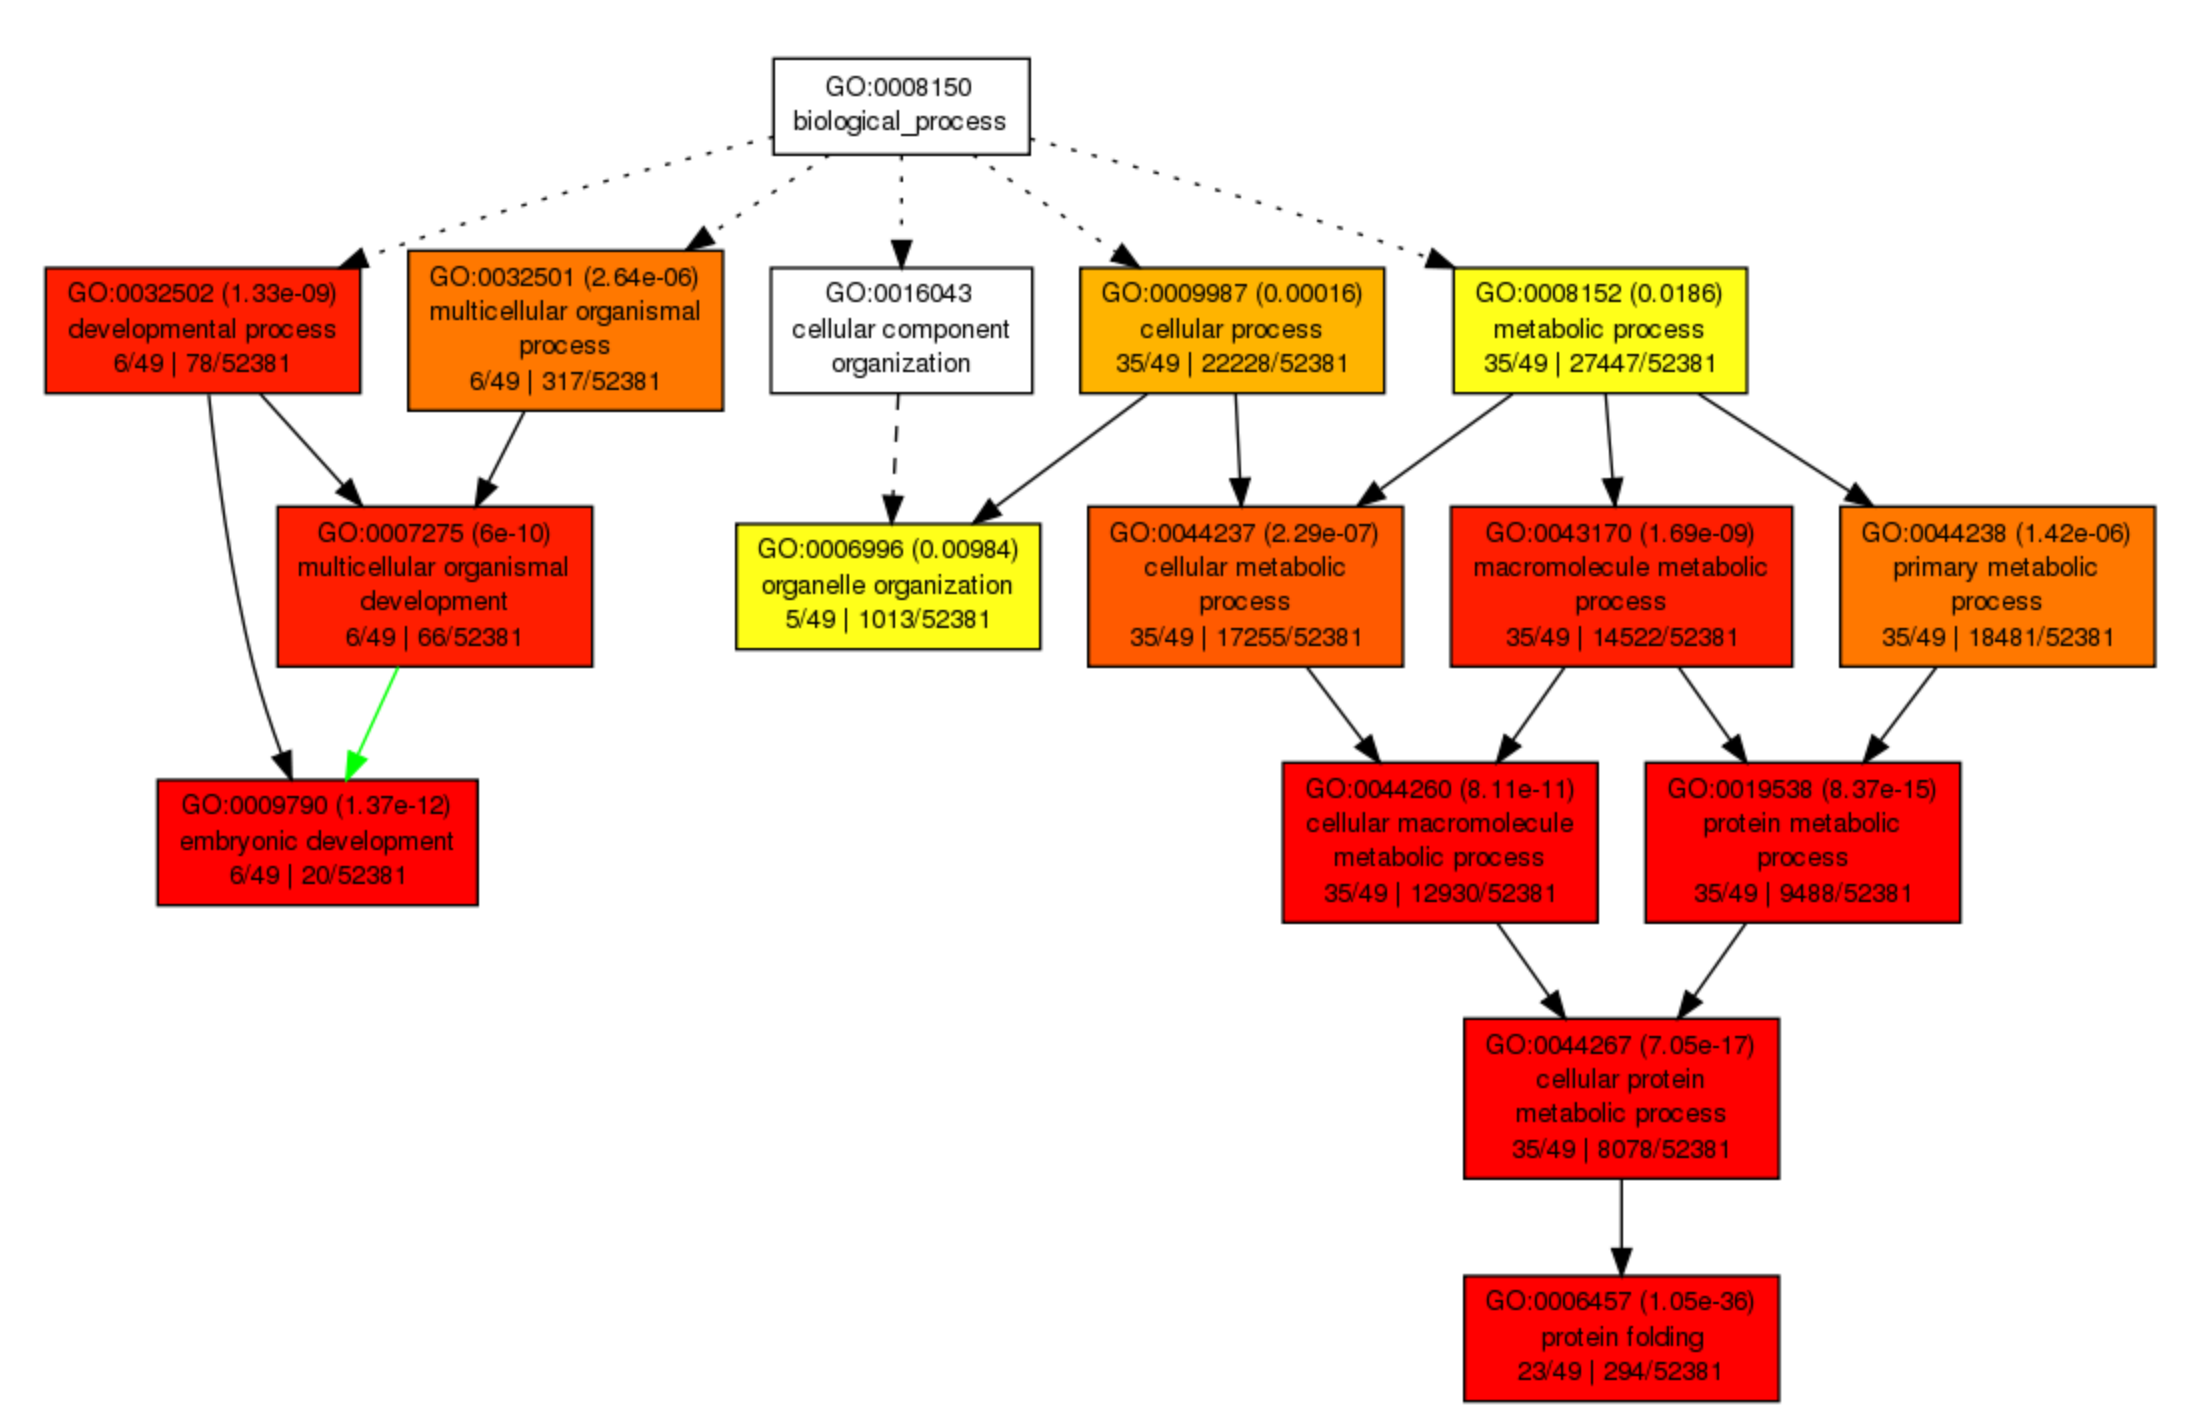

*TaHSP60*

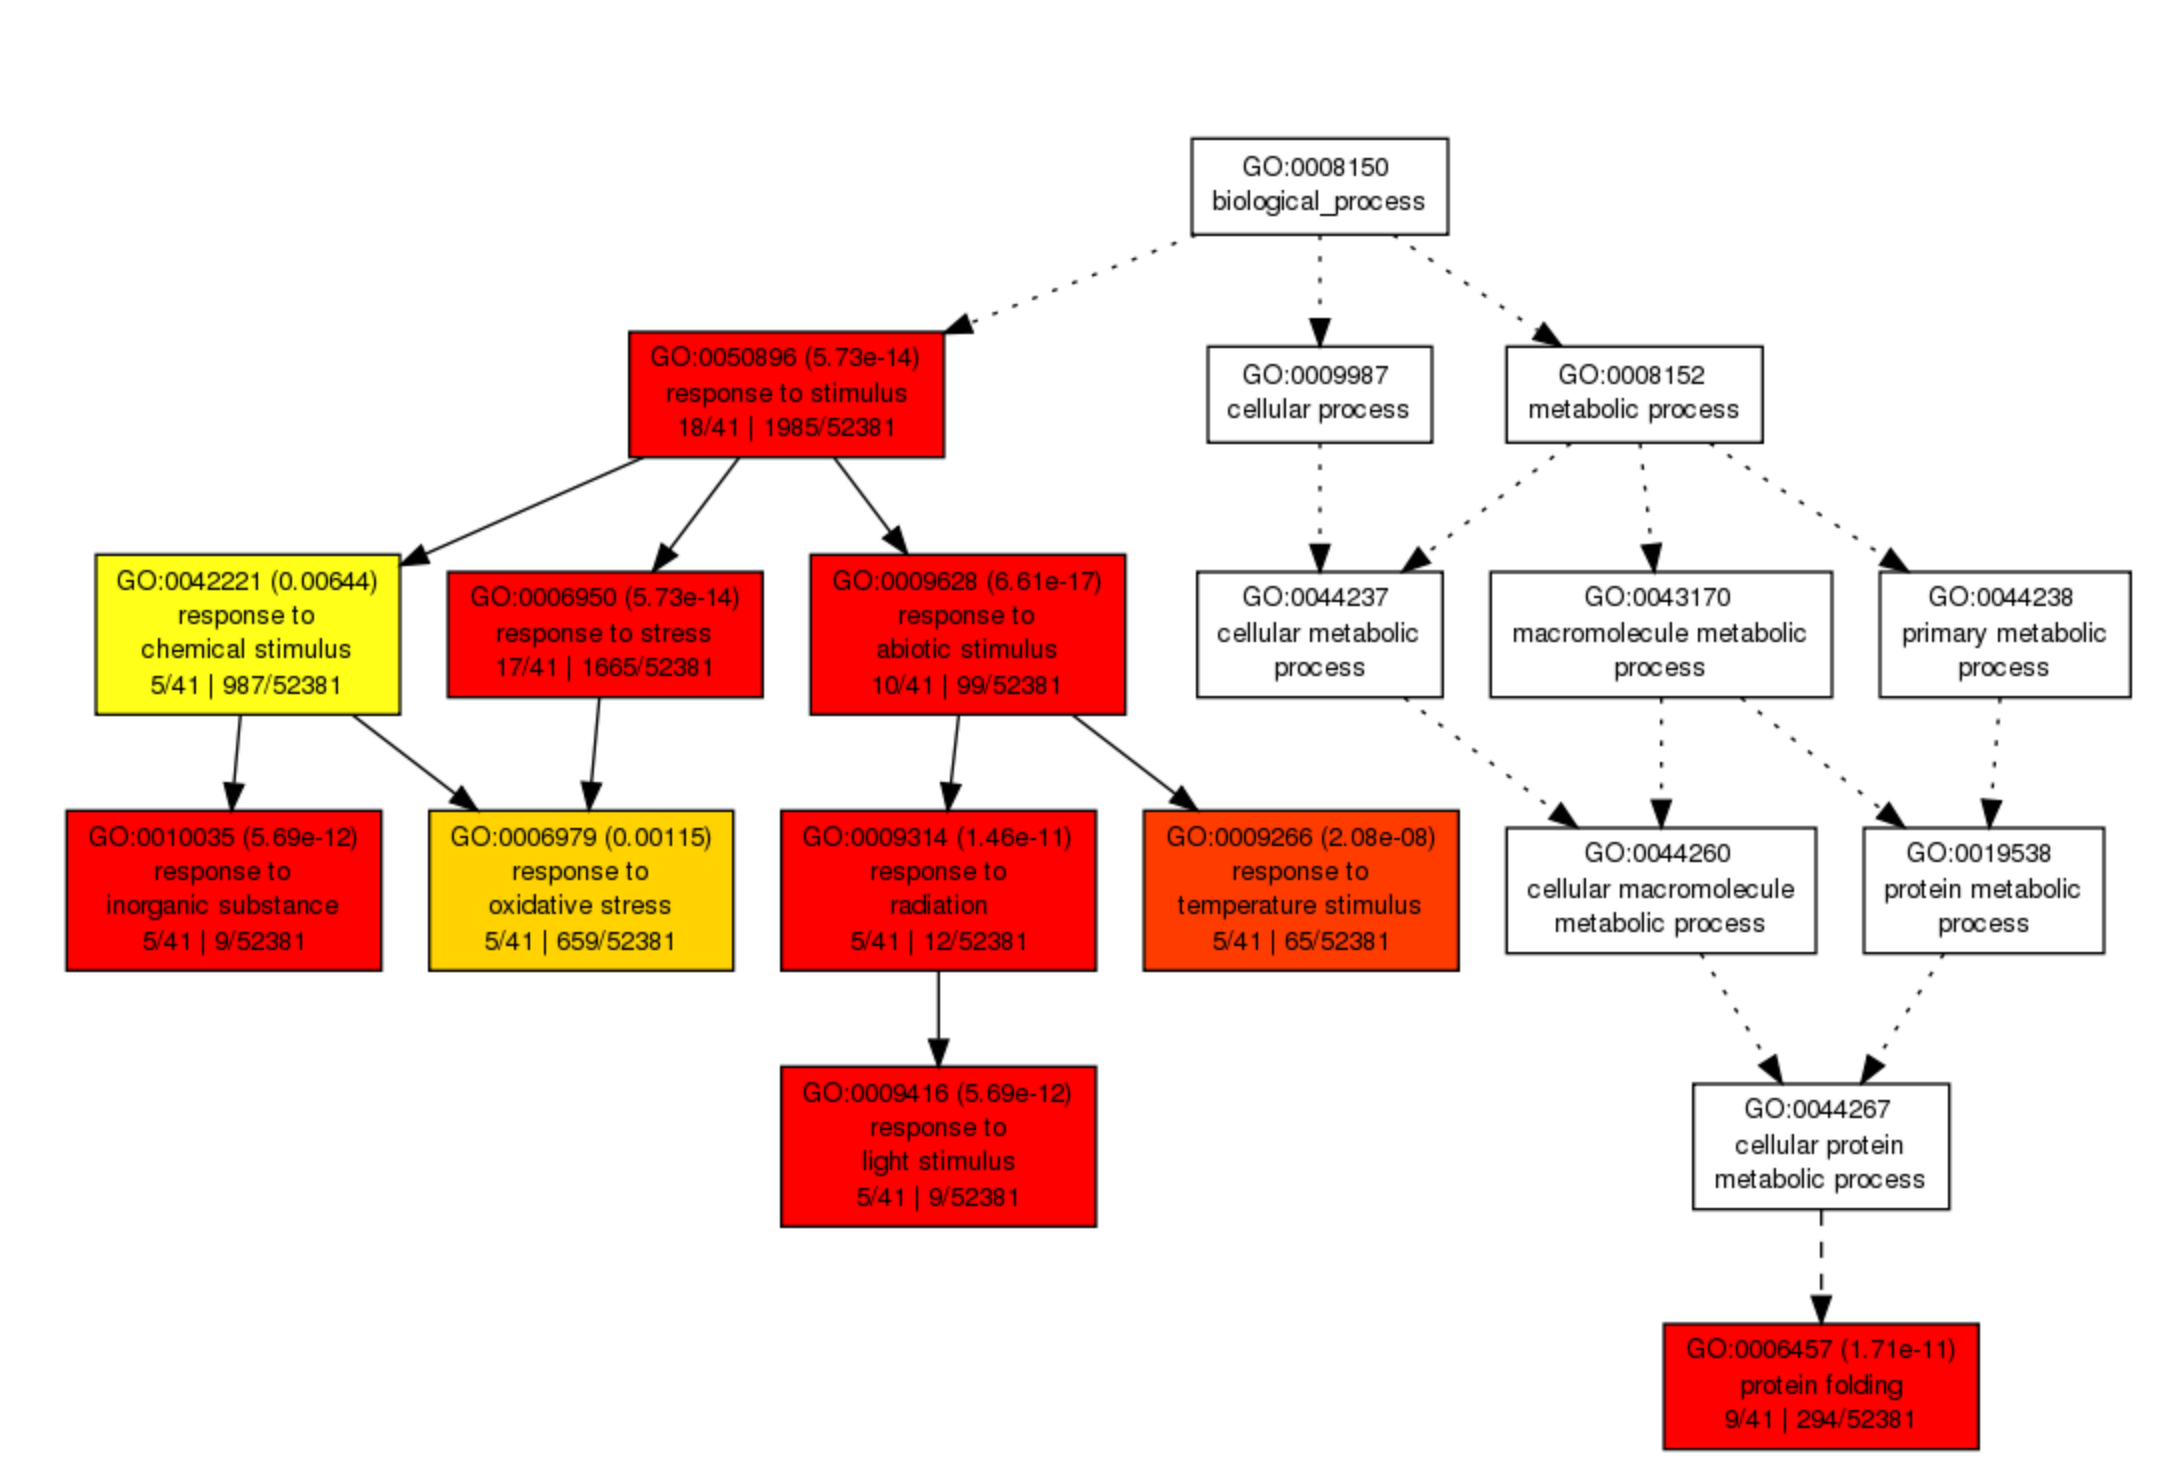

*TaHSP70*

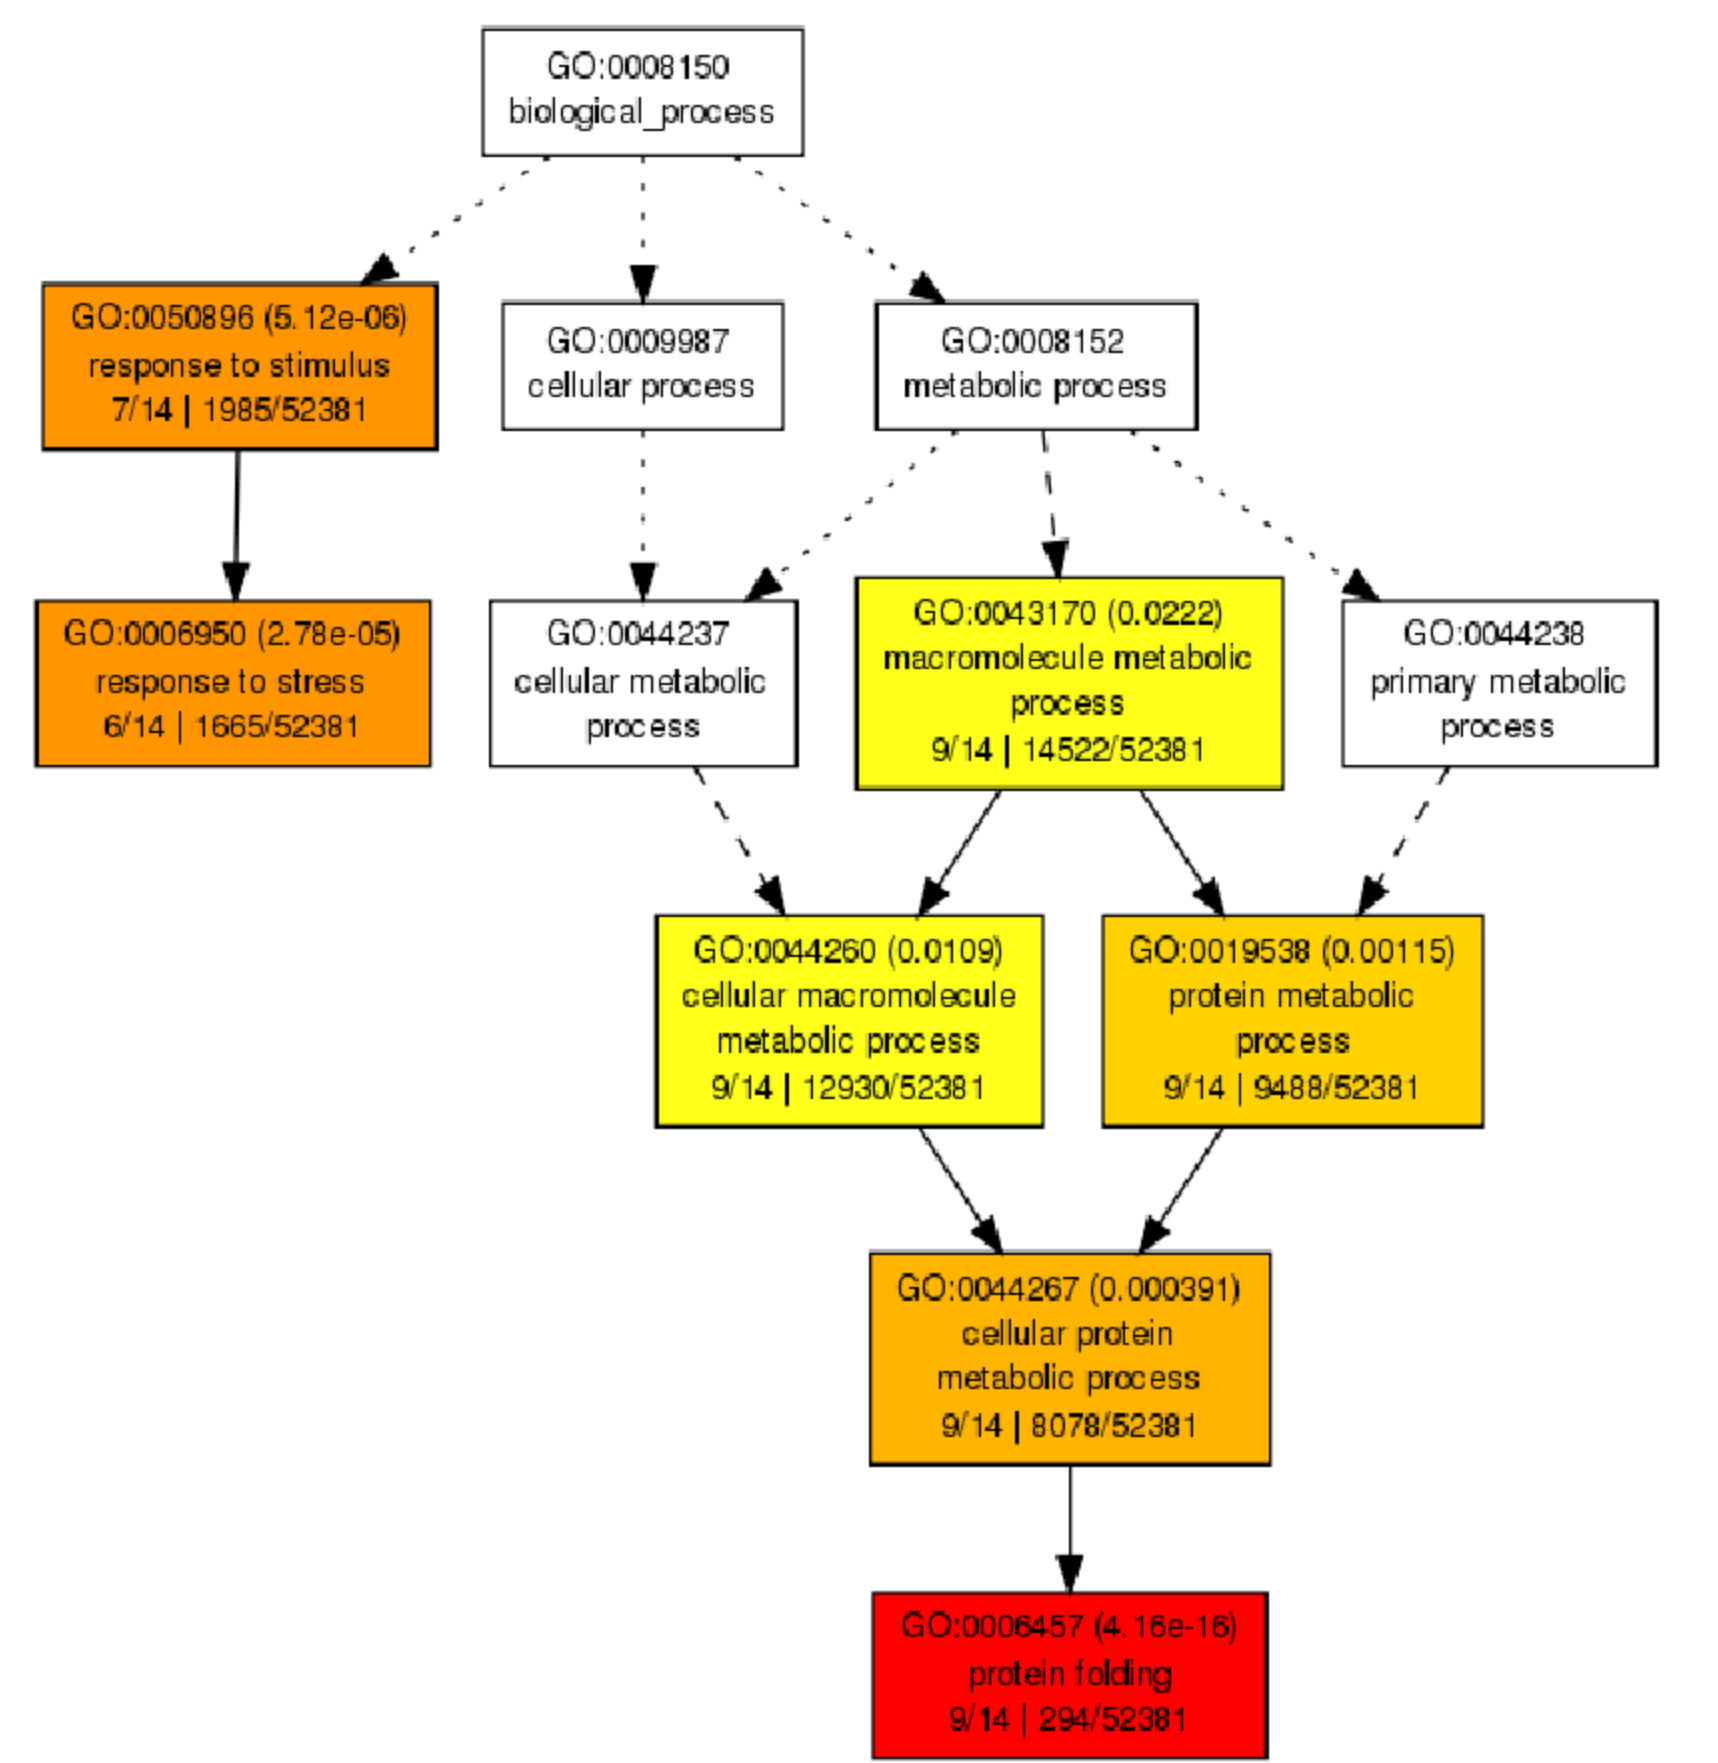

*TaHSP90*

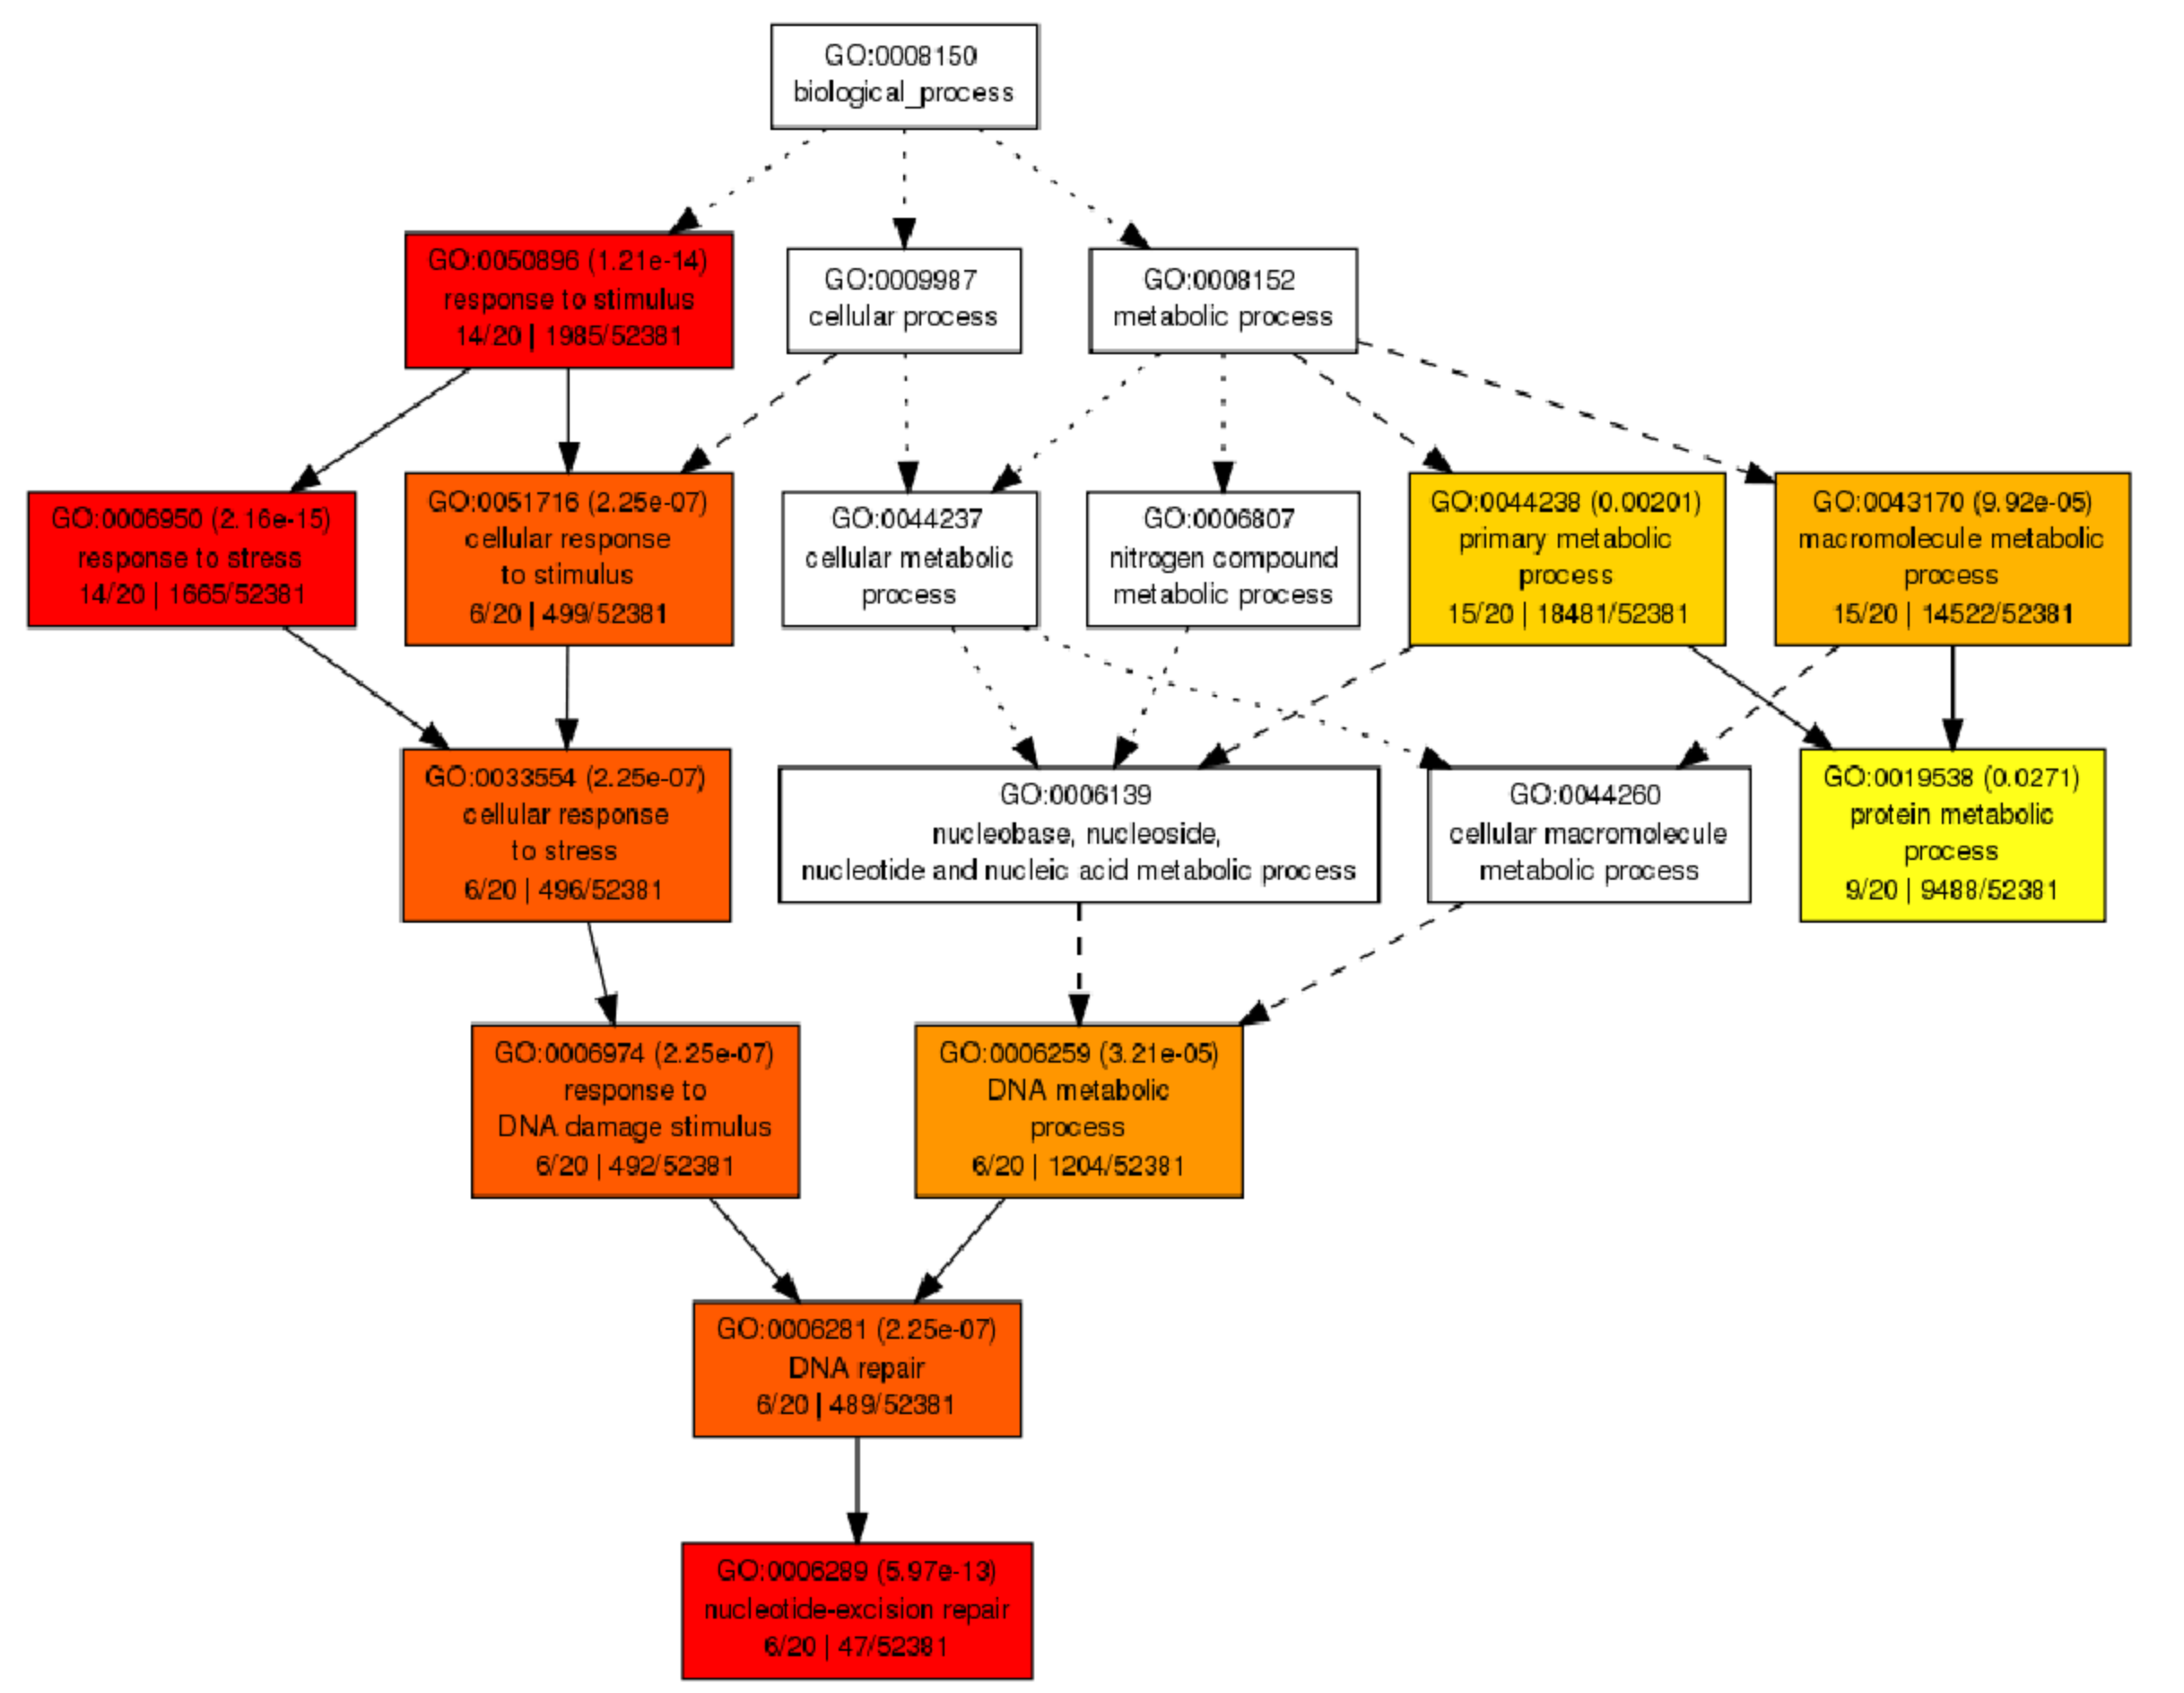

*TaHSP100*

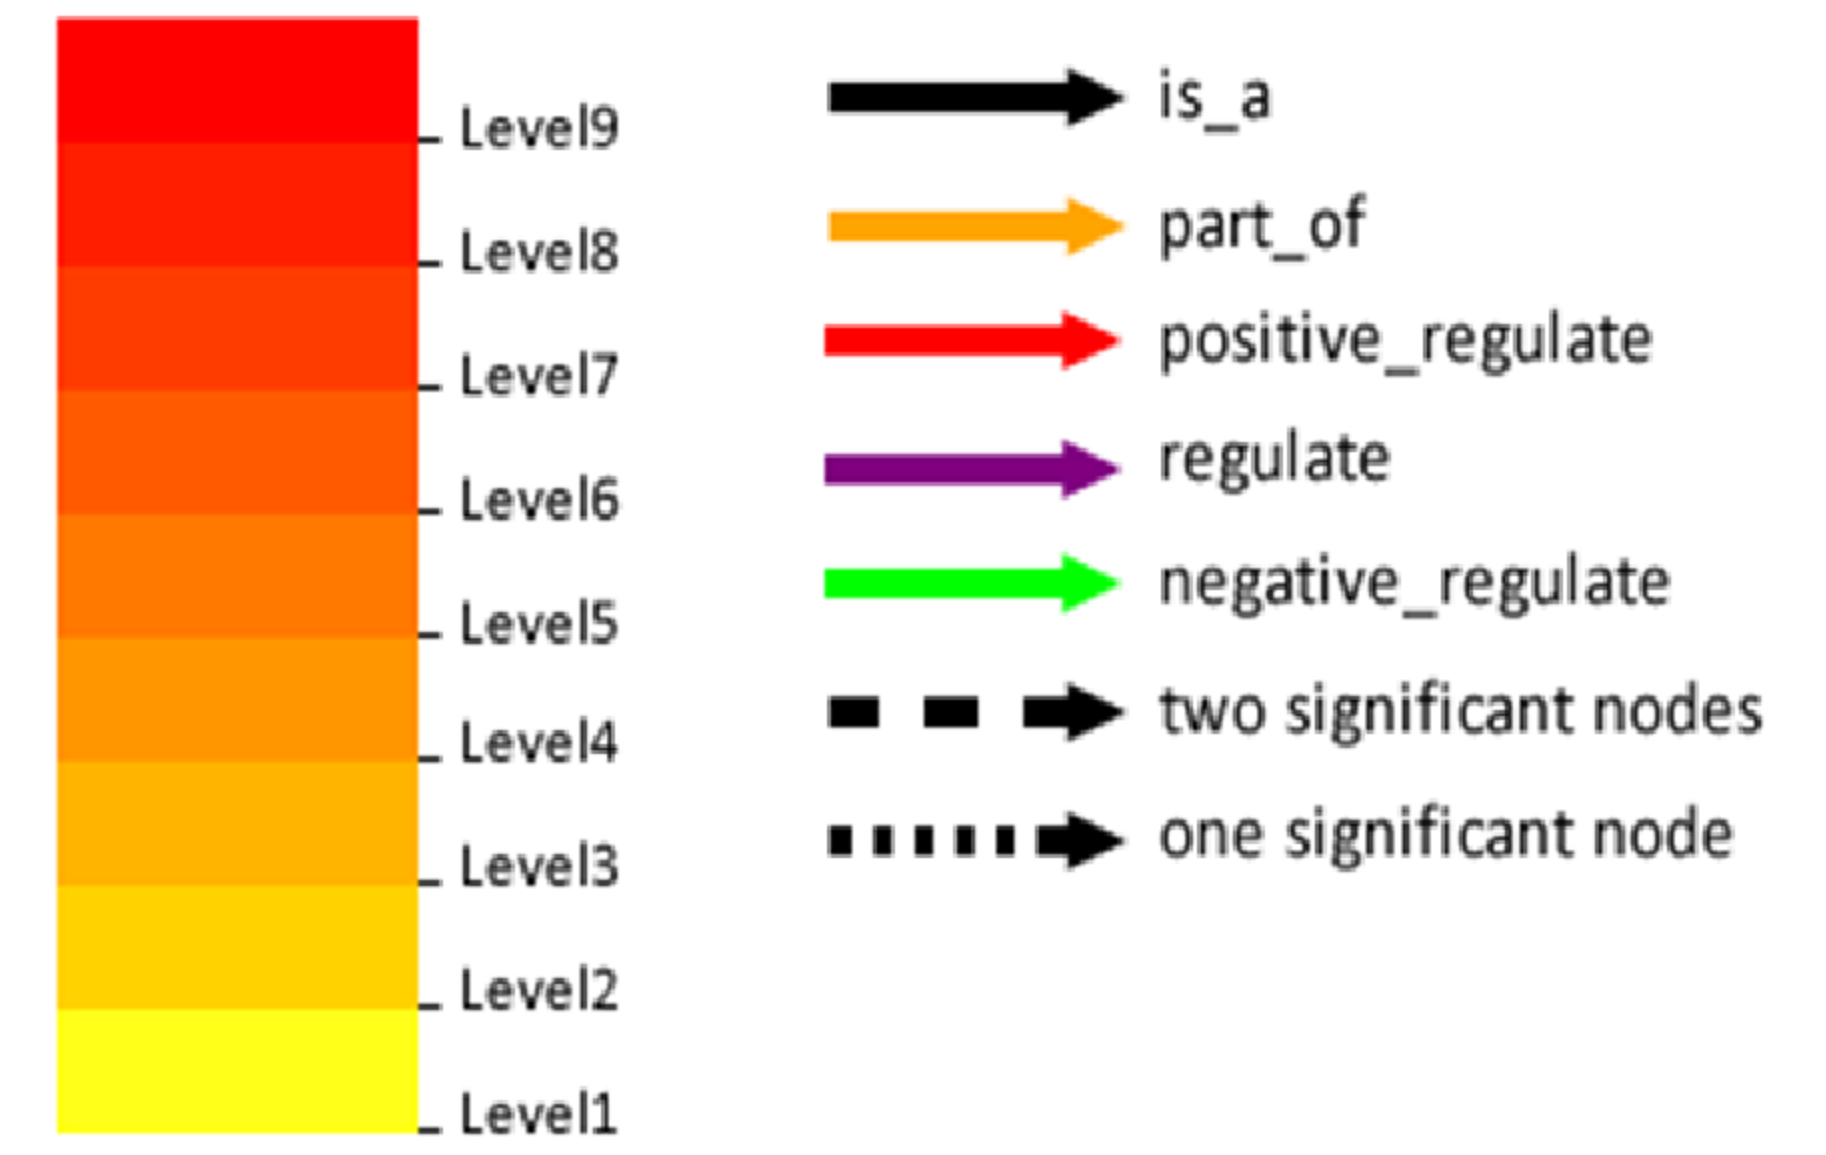

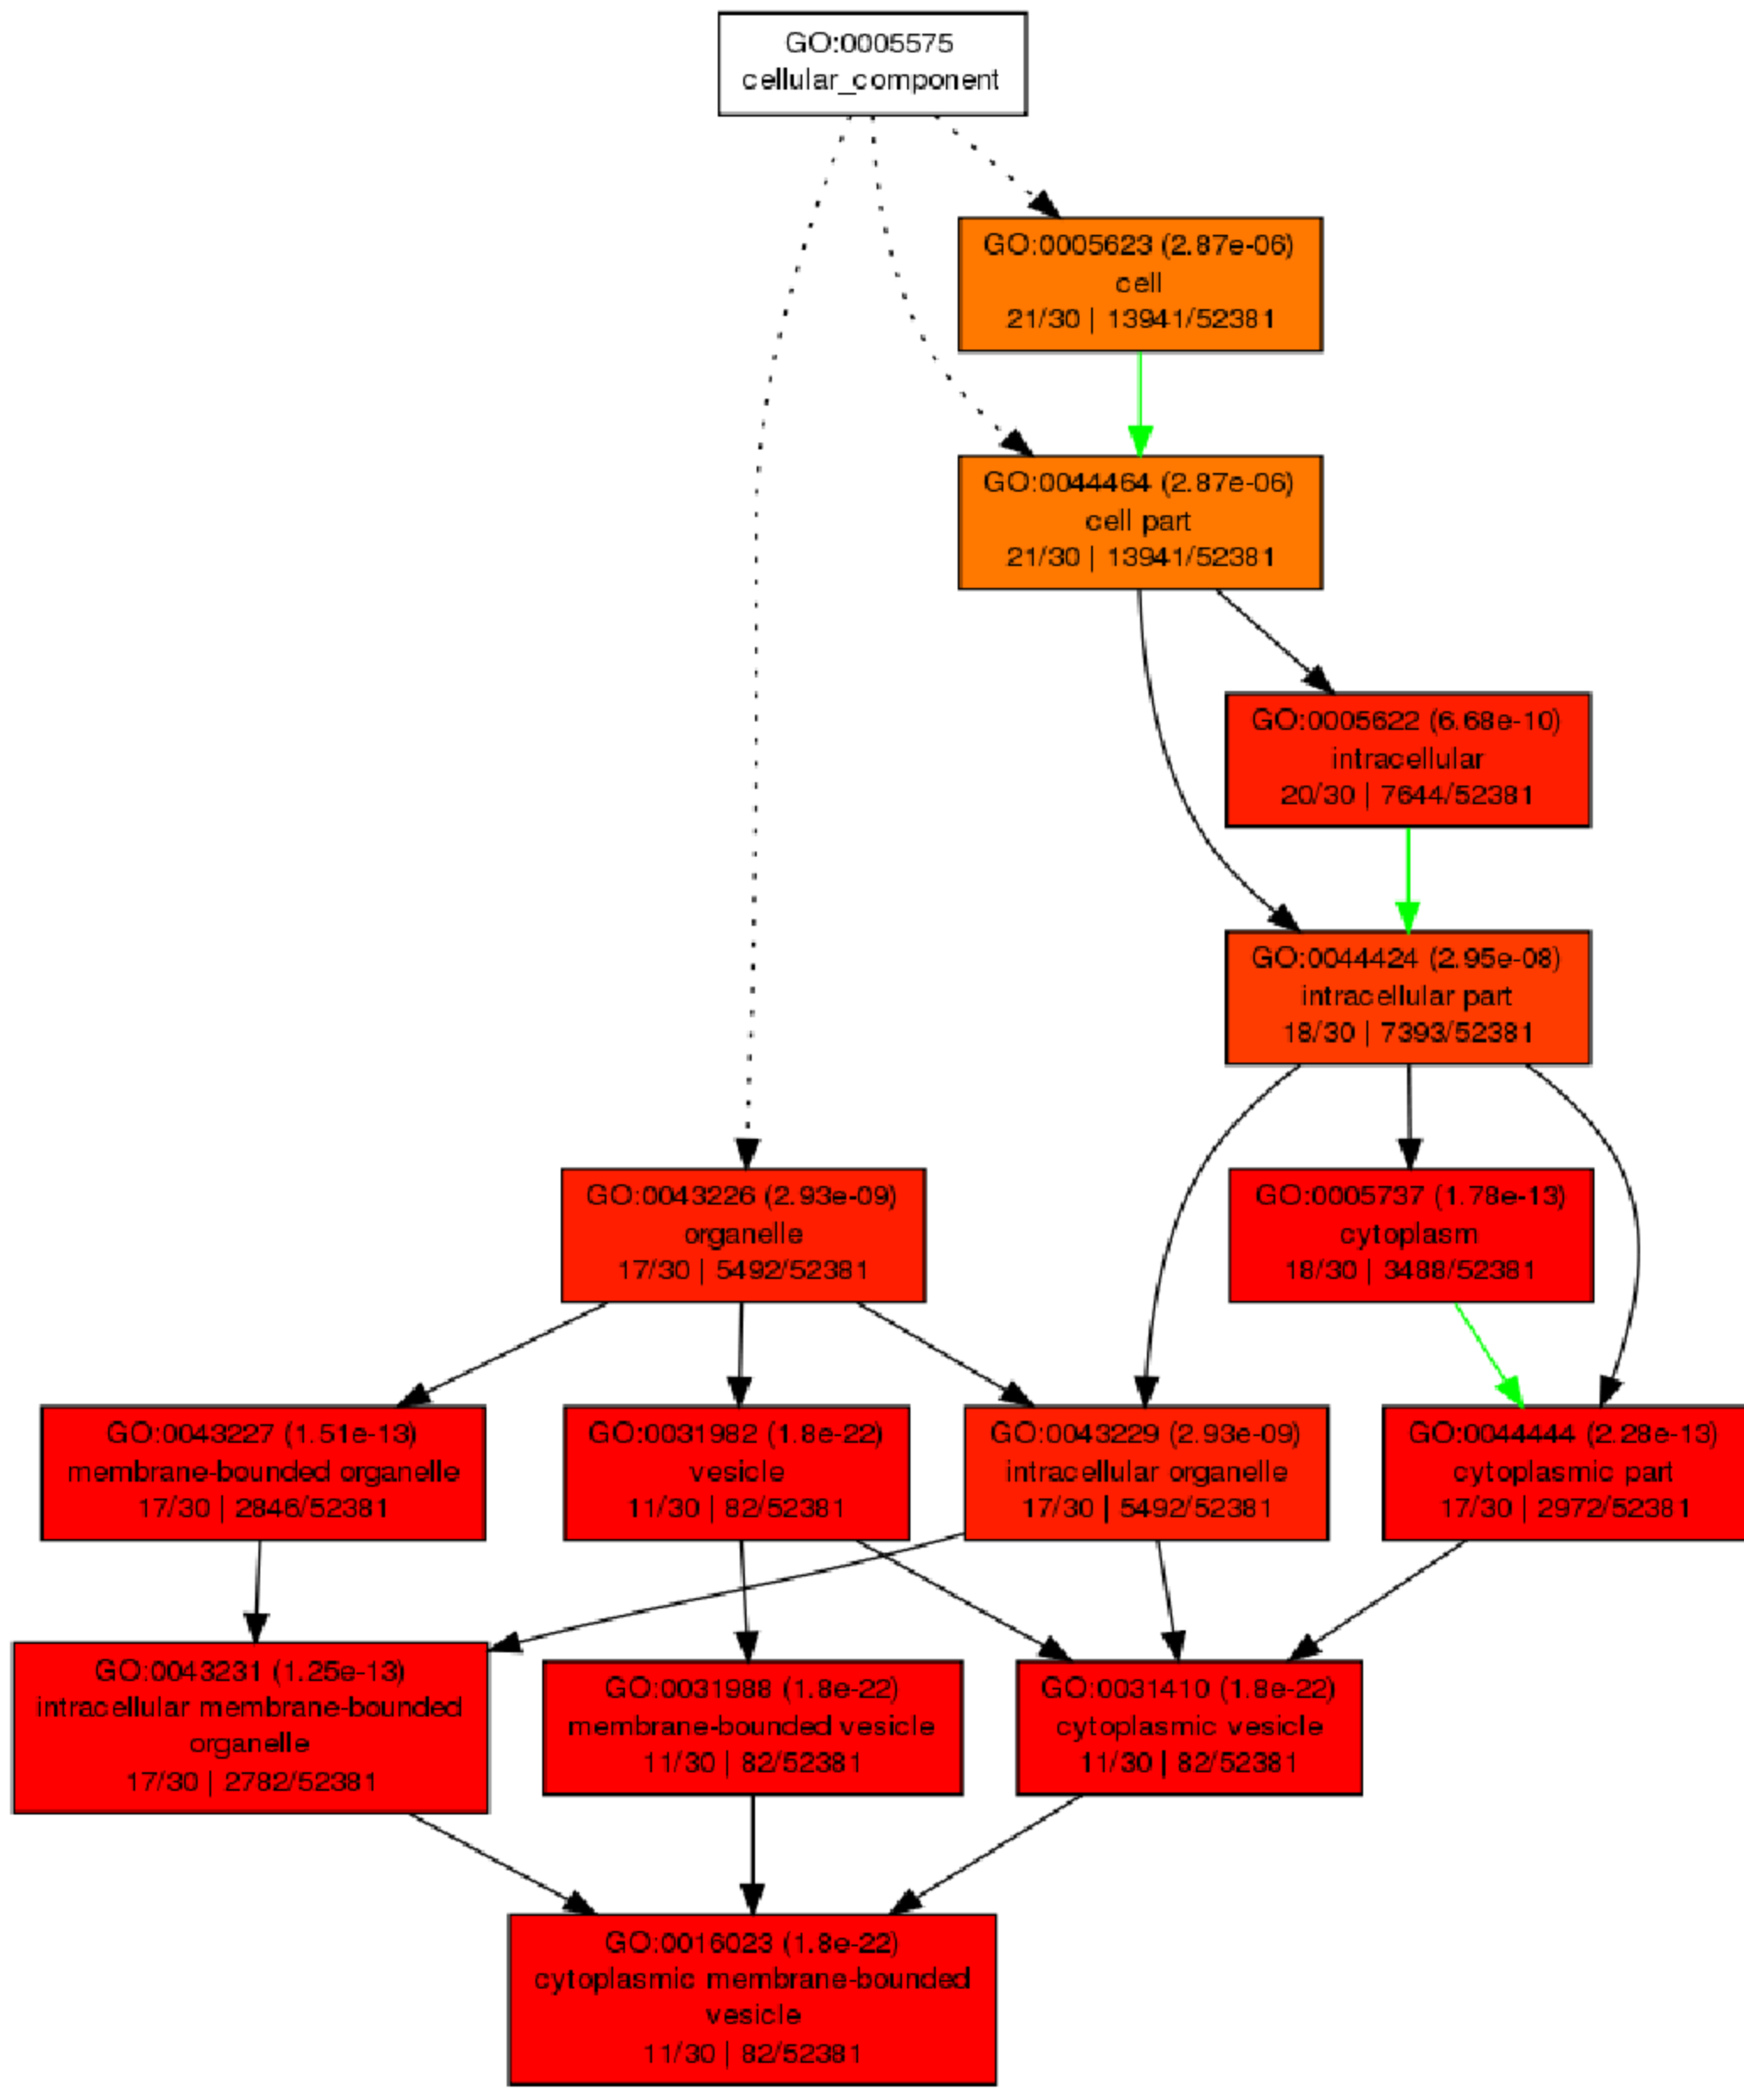

*TaSHSP*

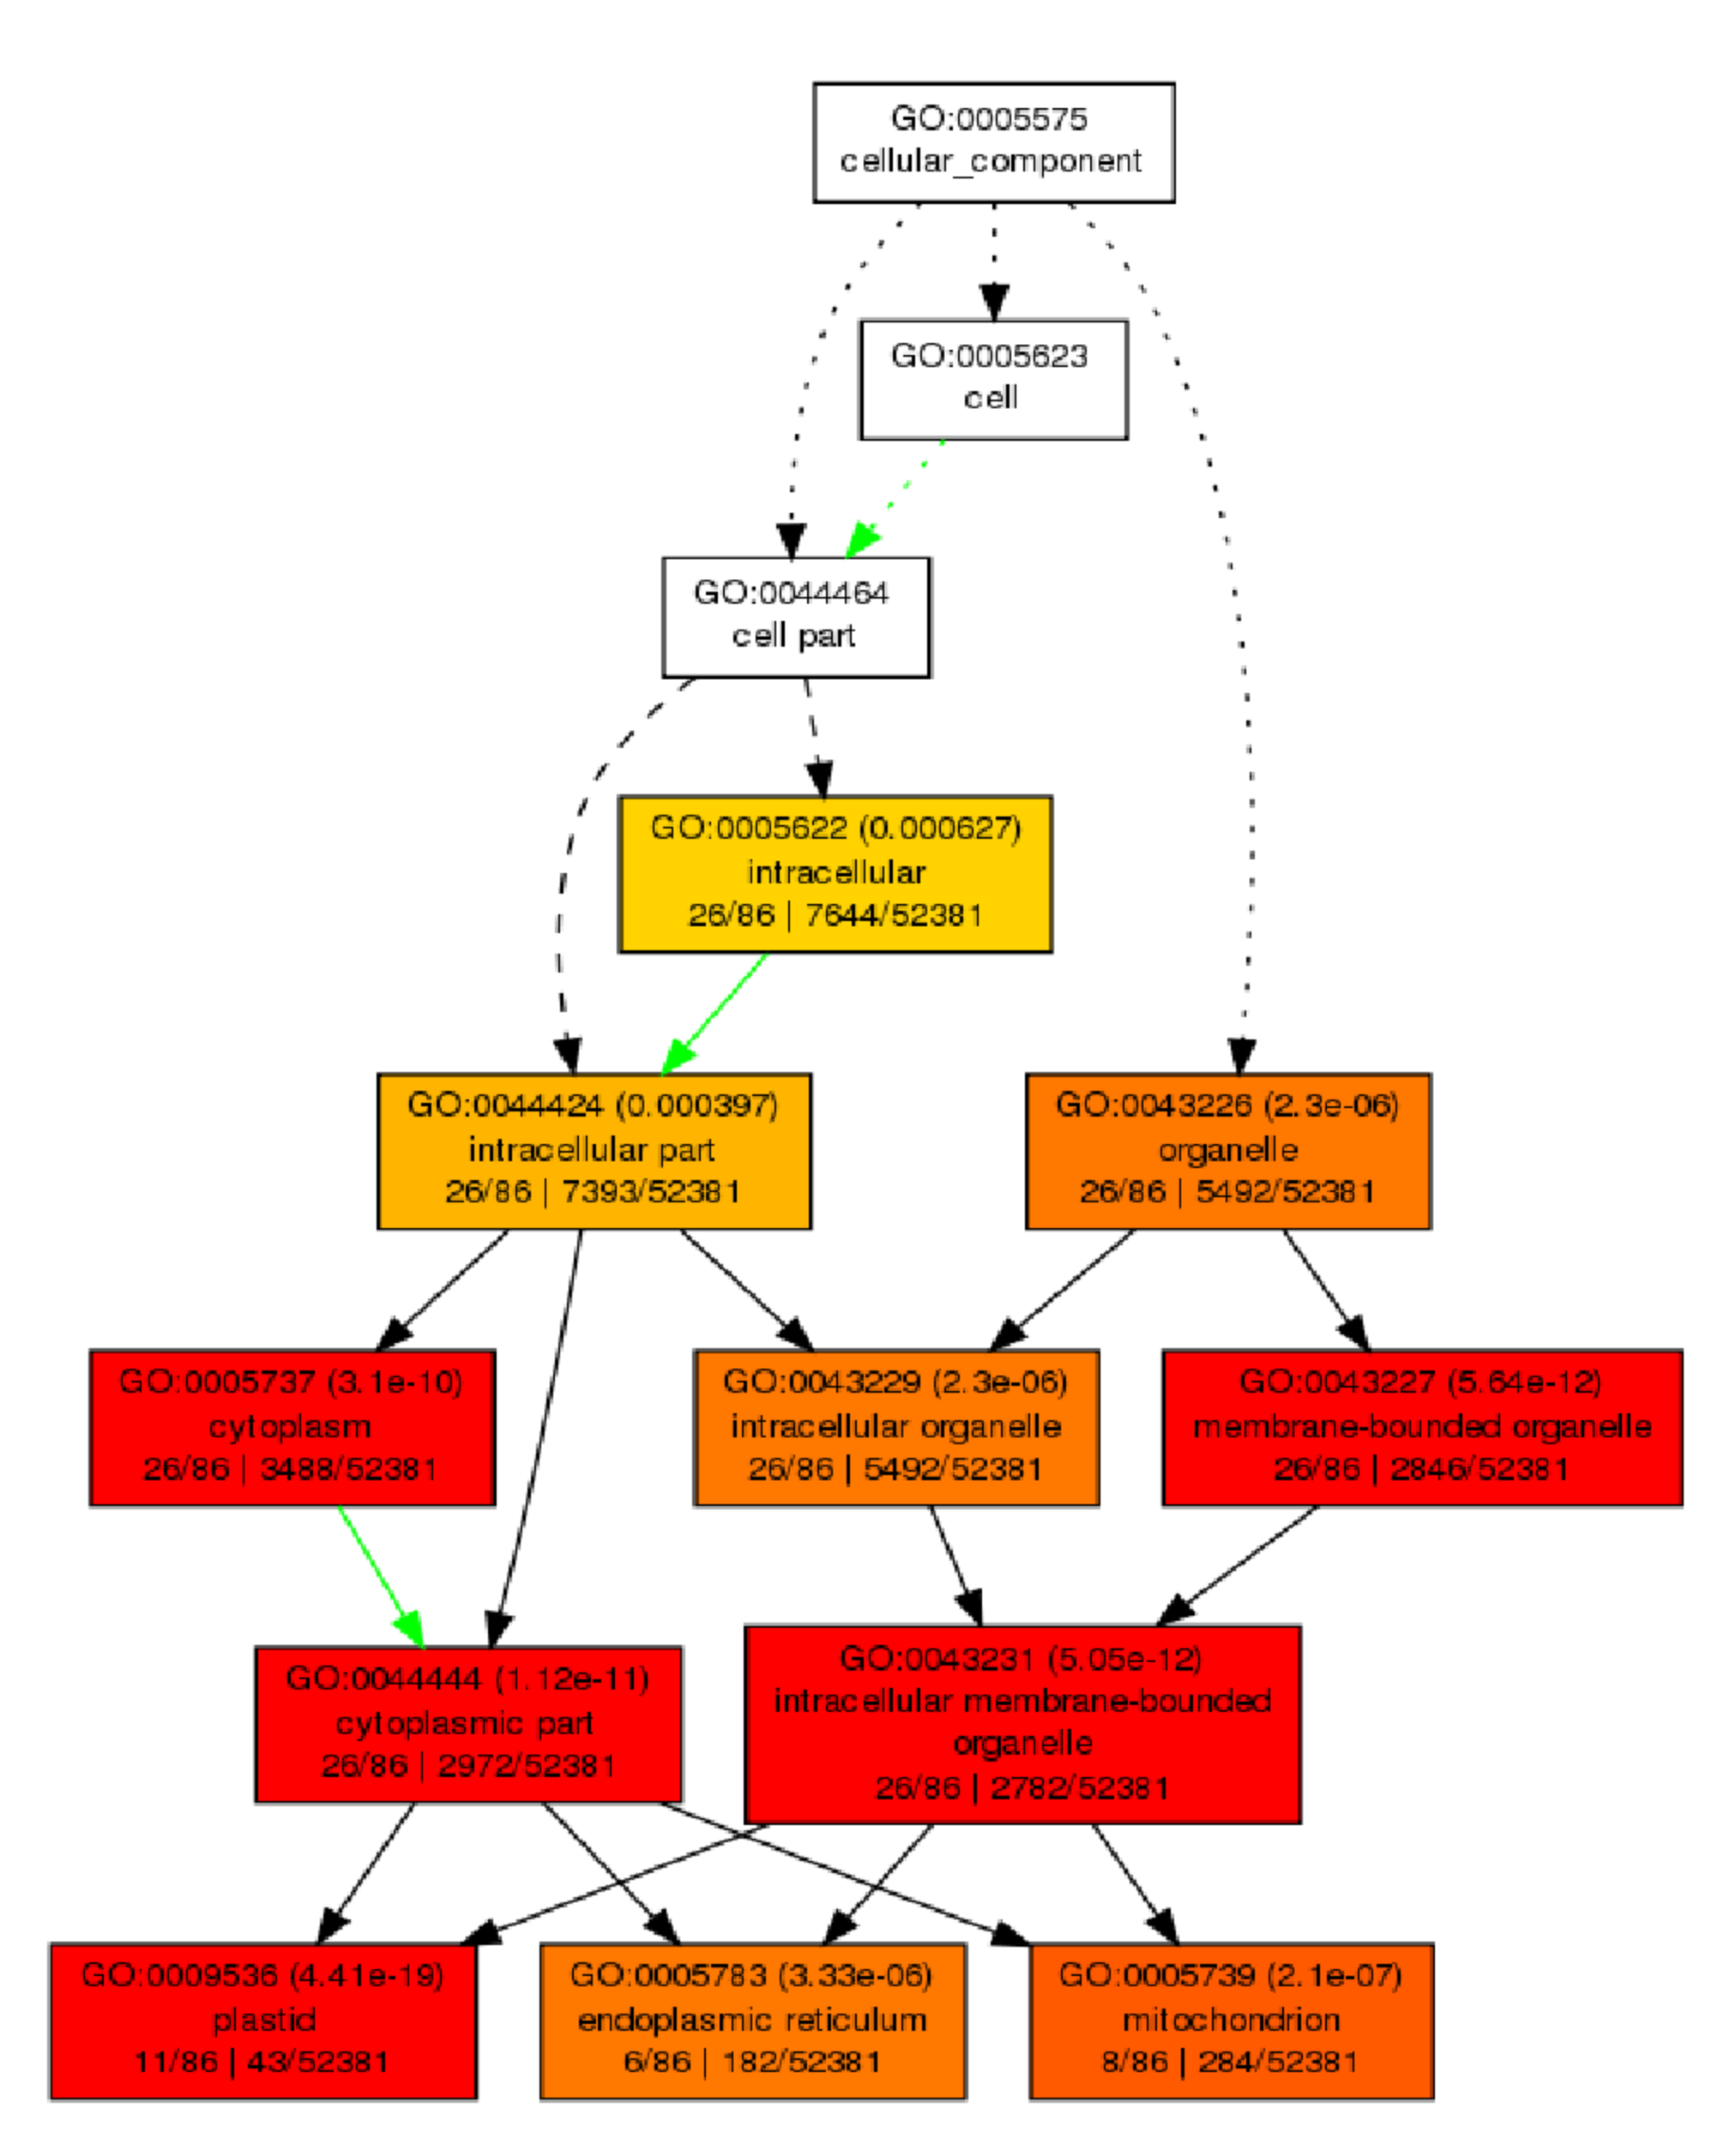

*TaHSP40*

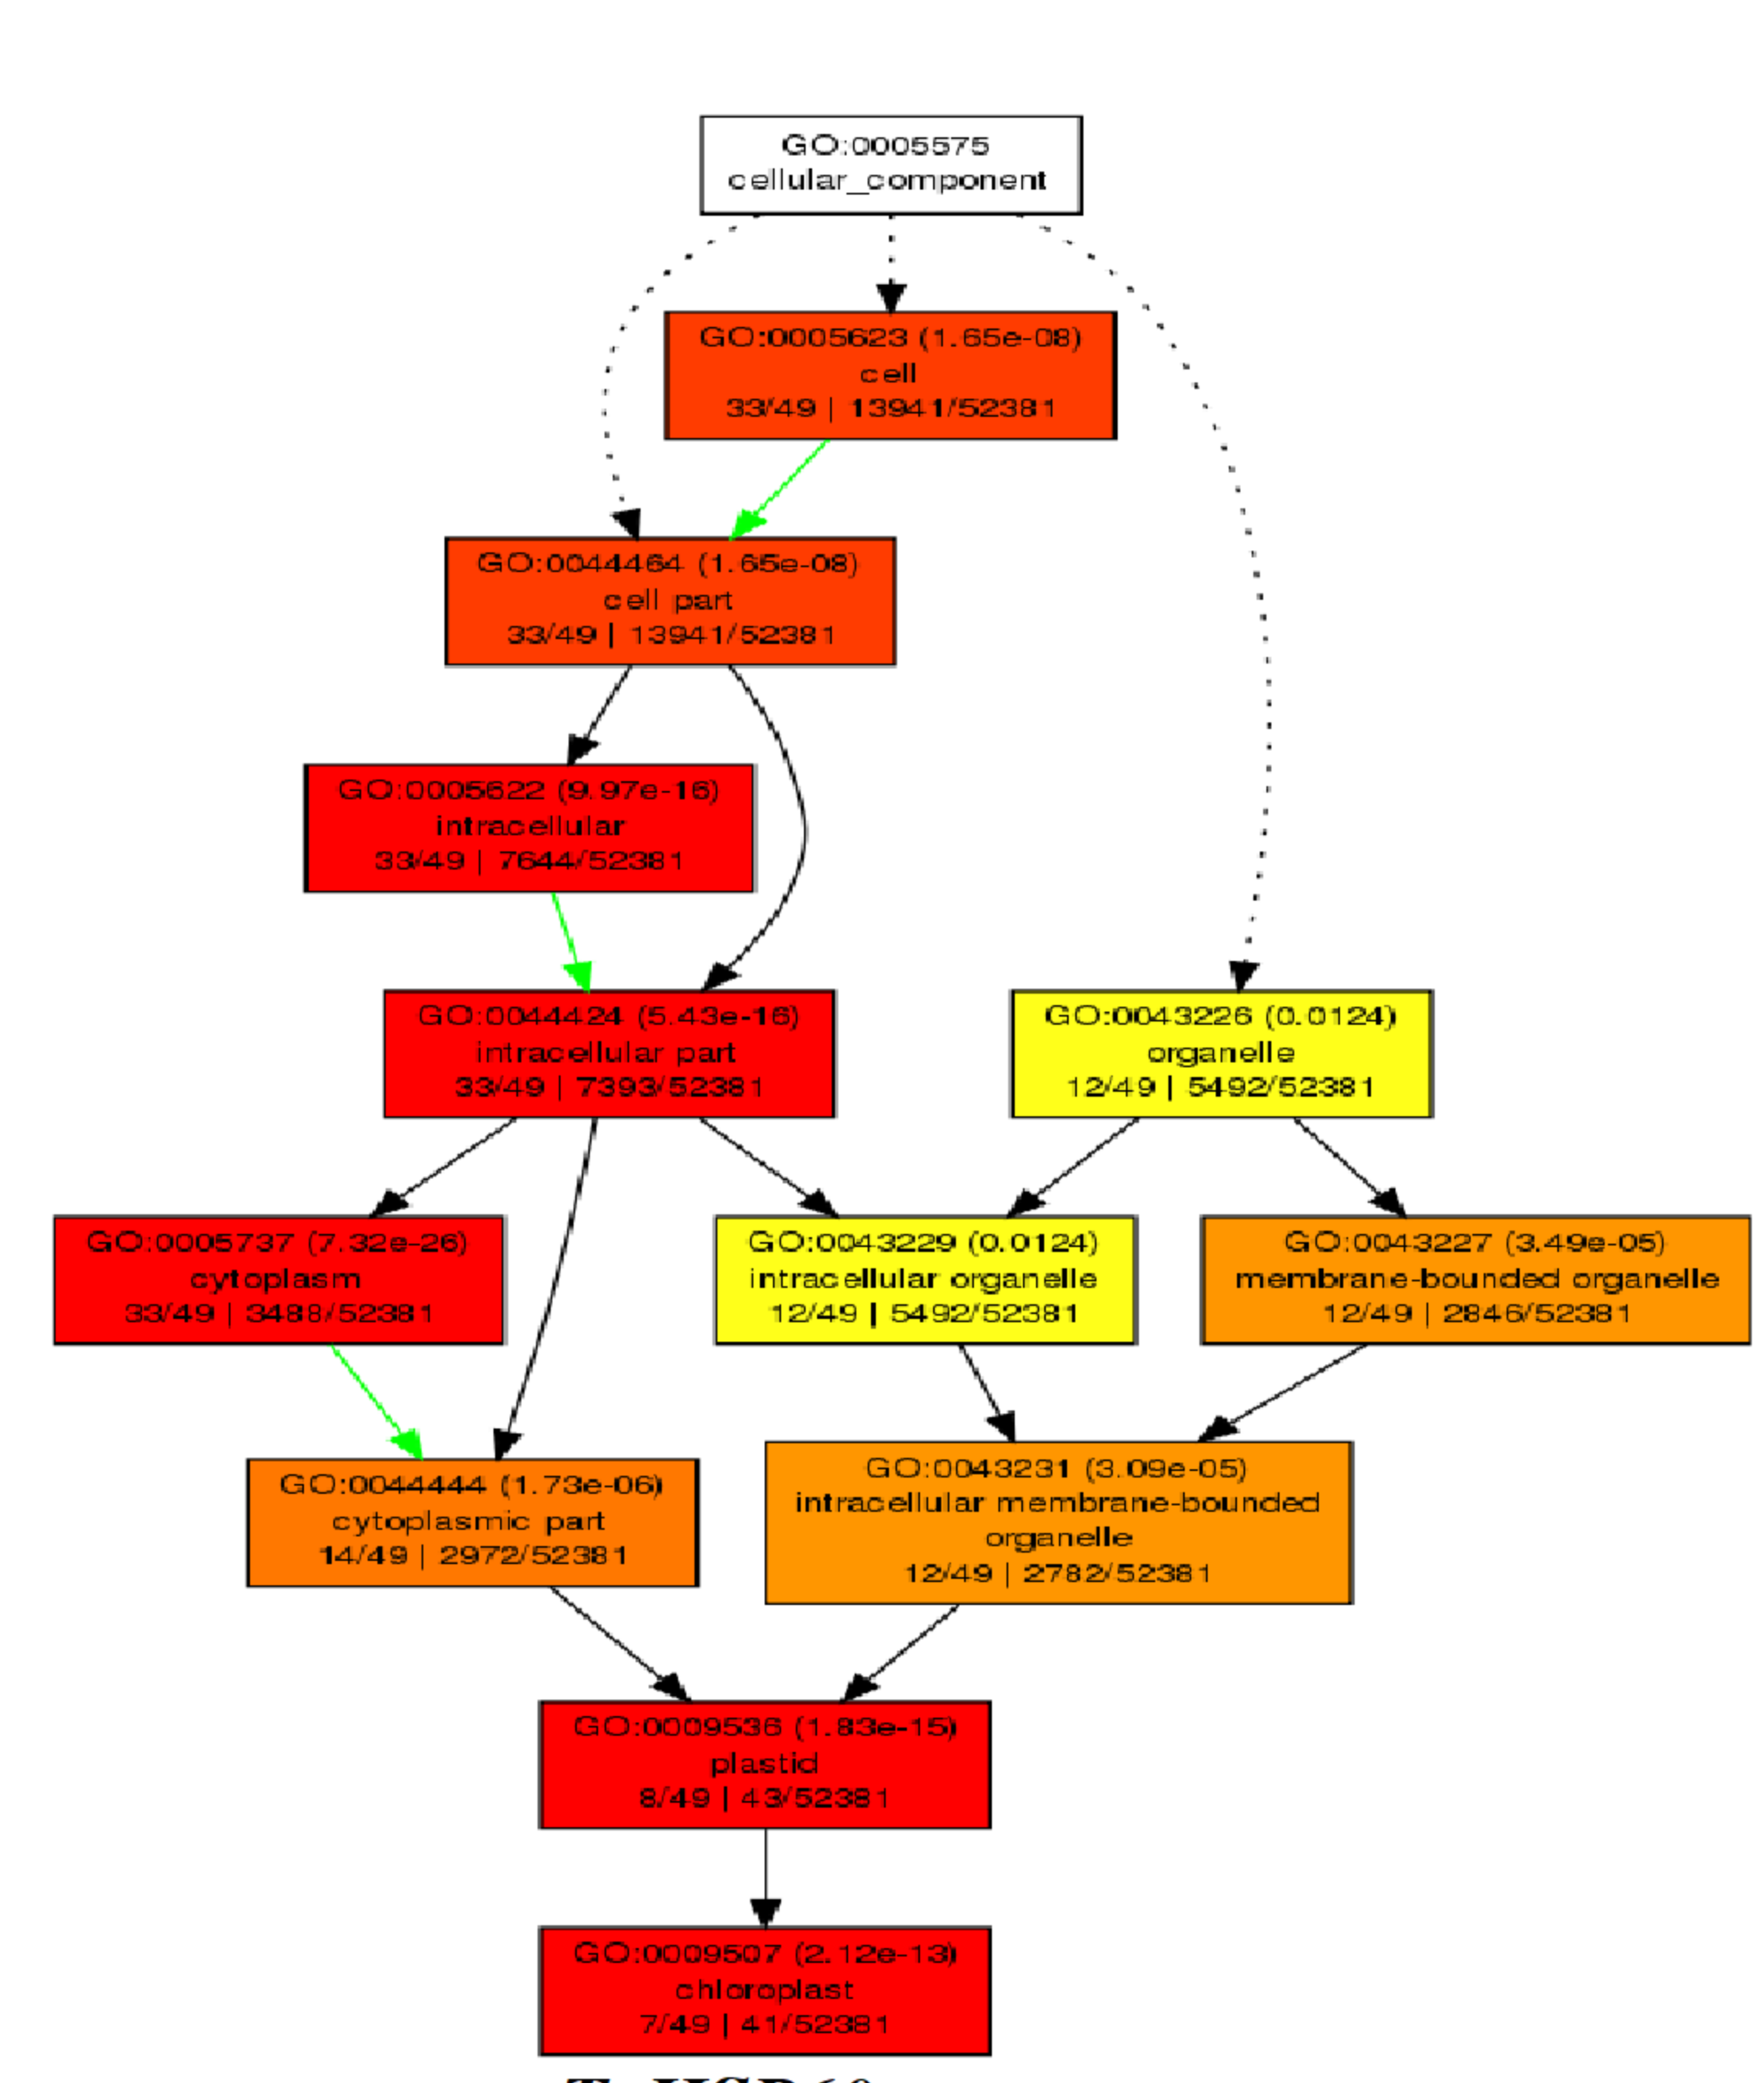

*TaHSP60*

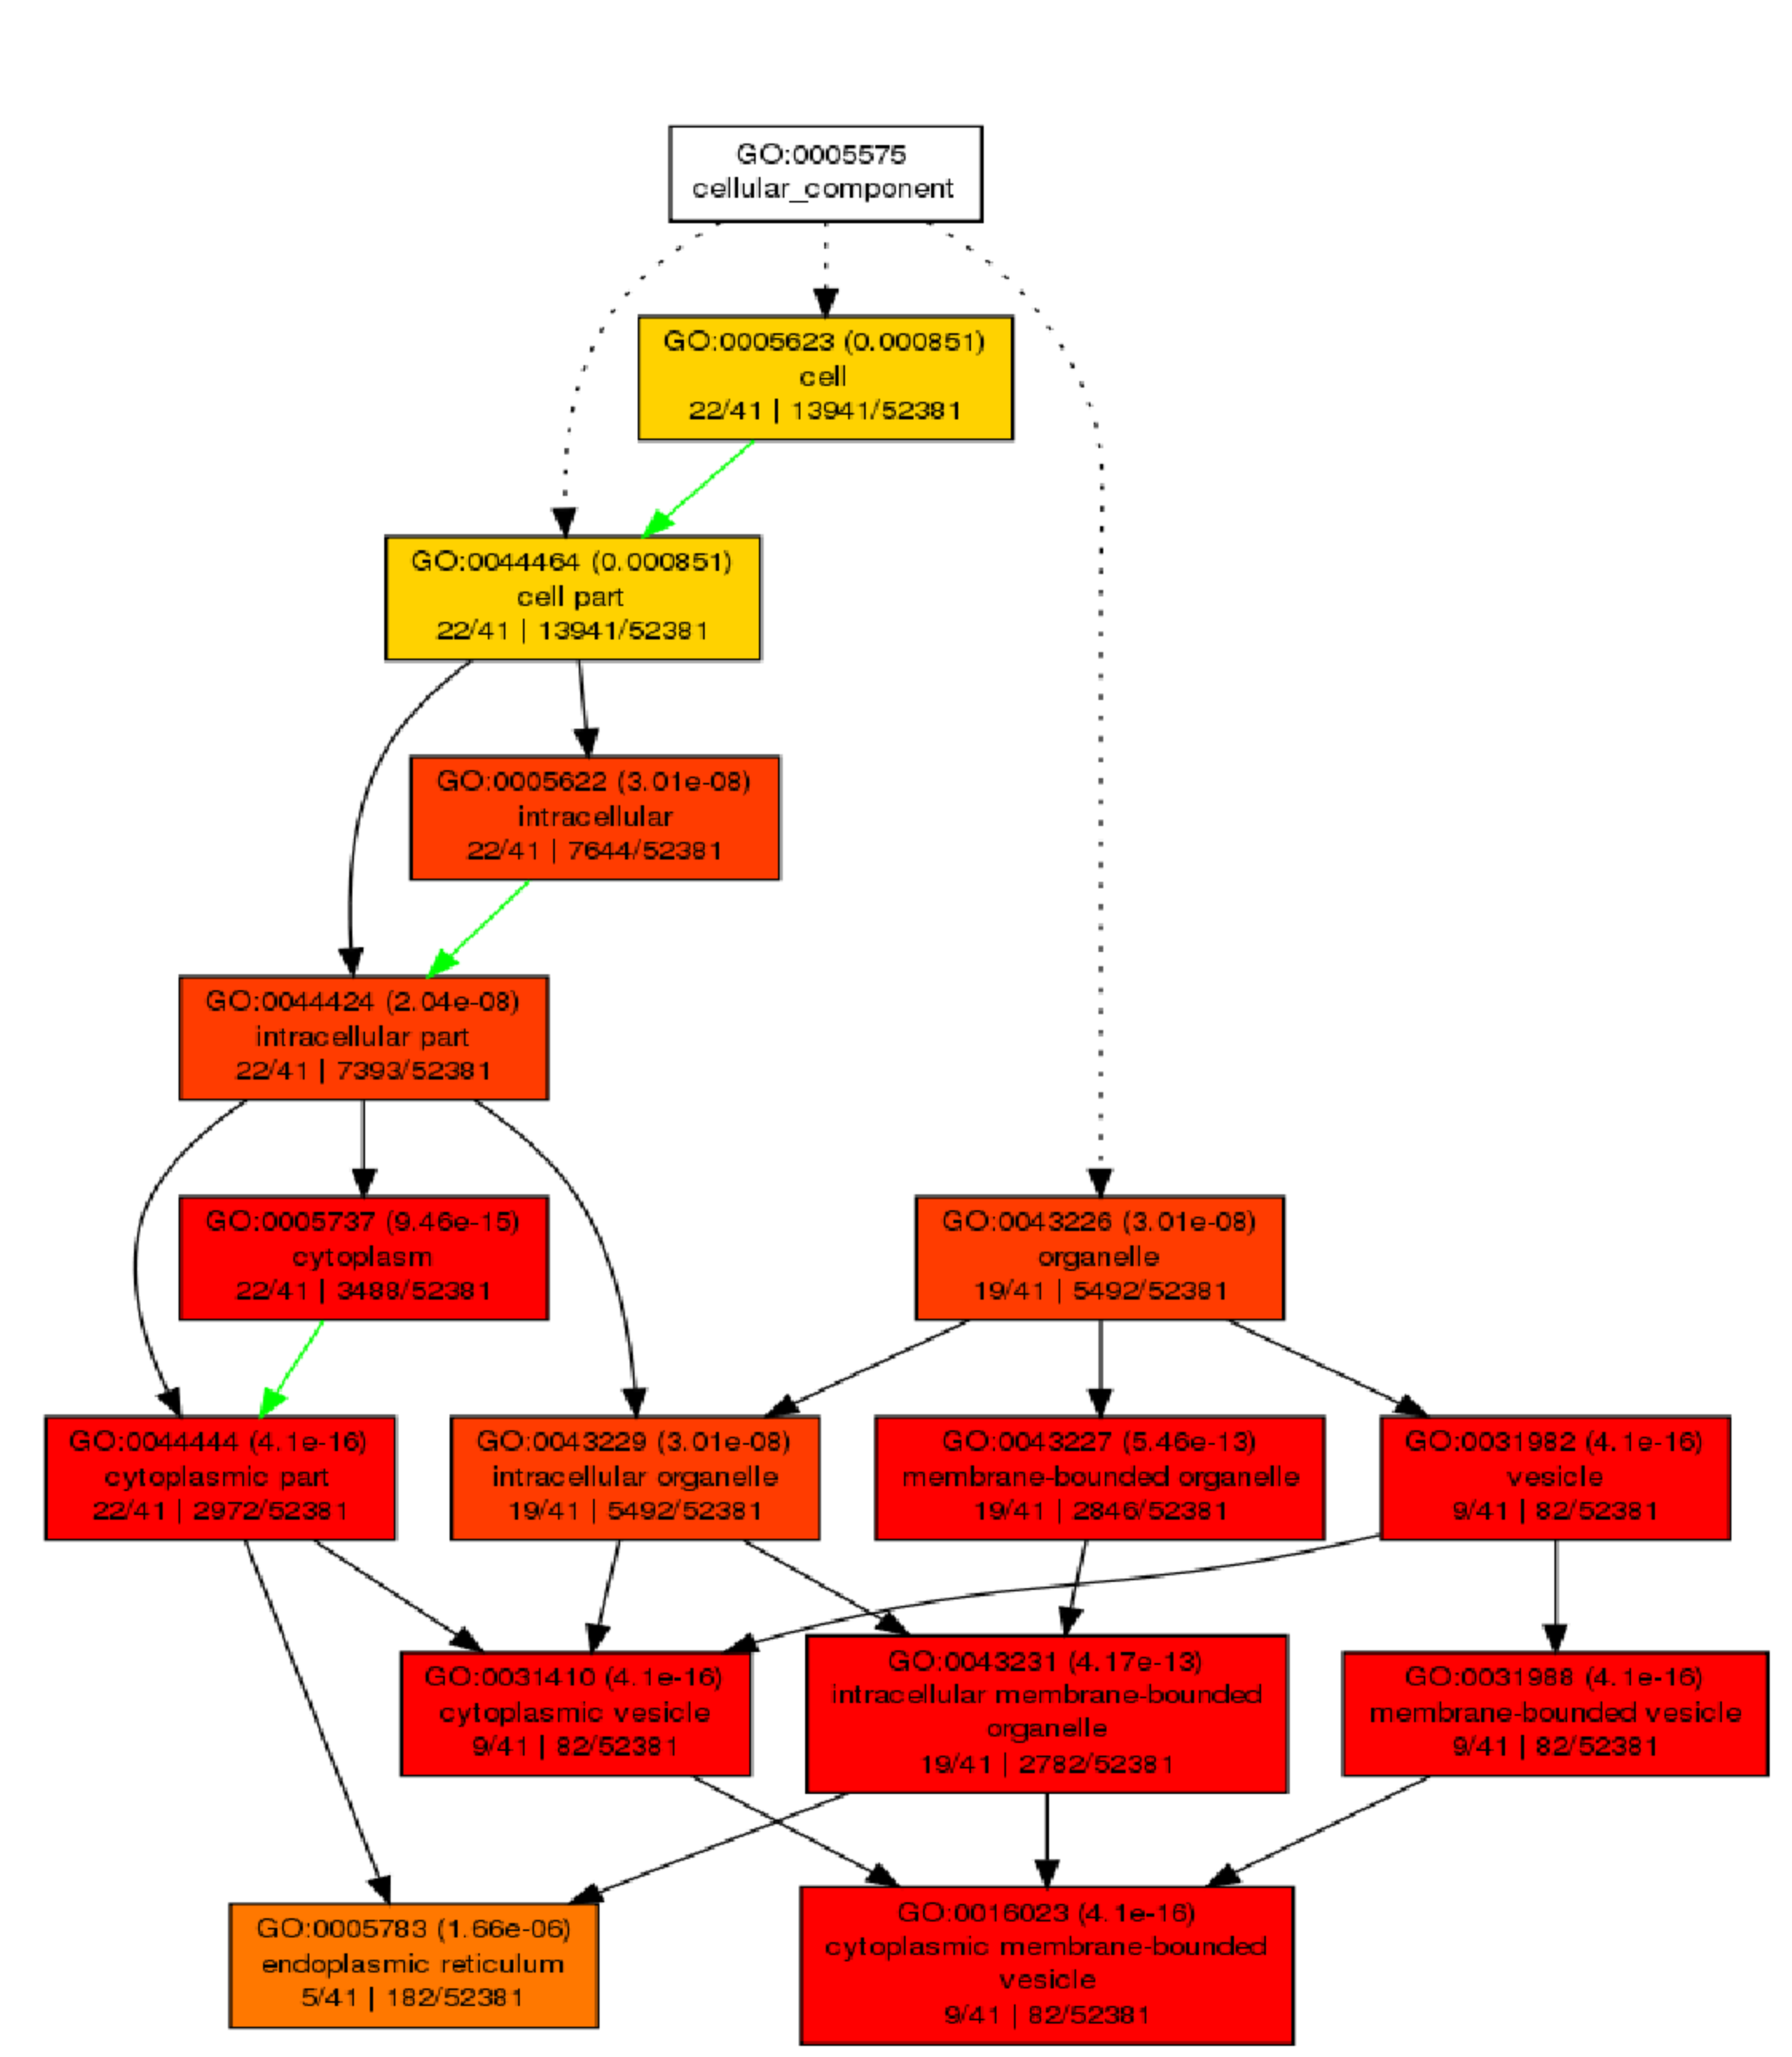

*TaHSP70*

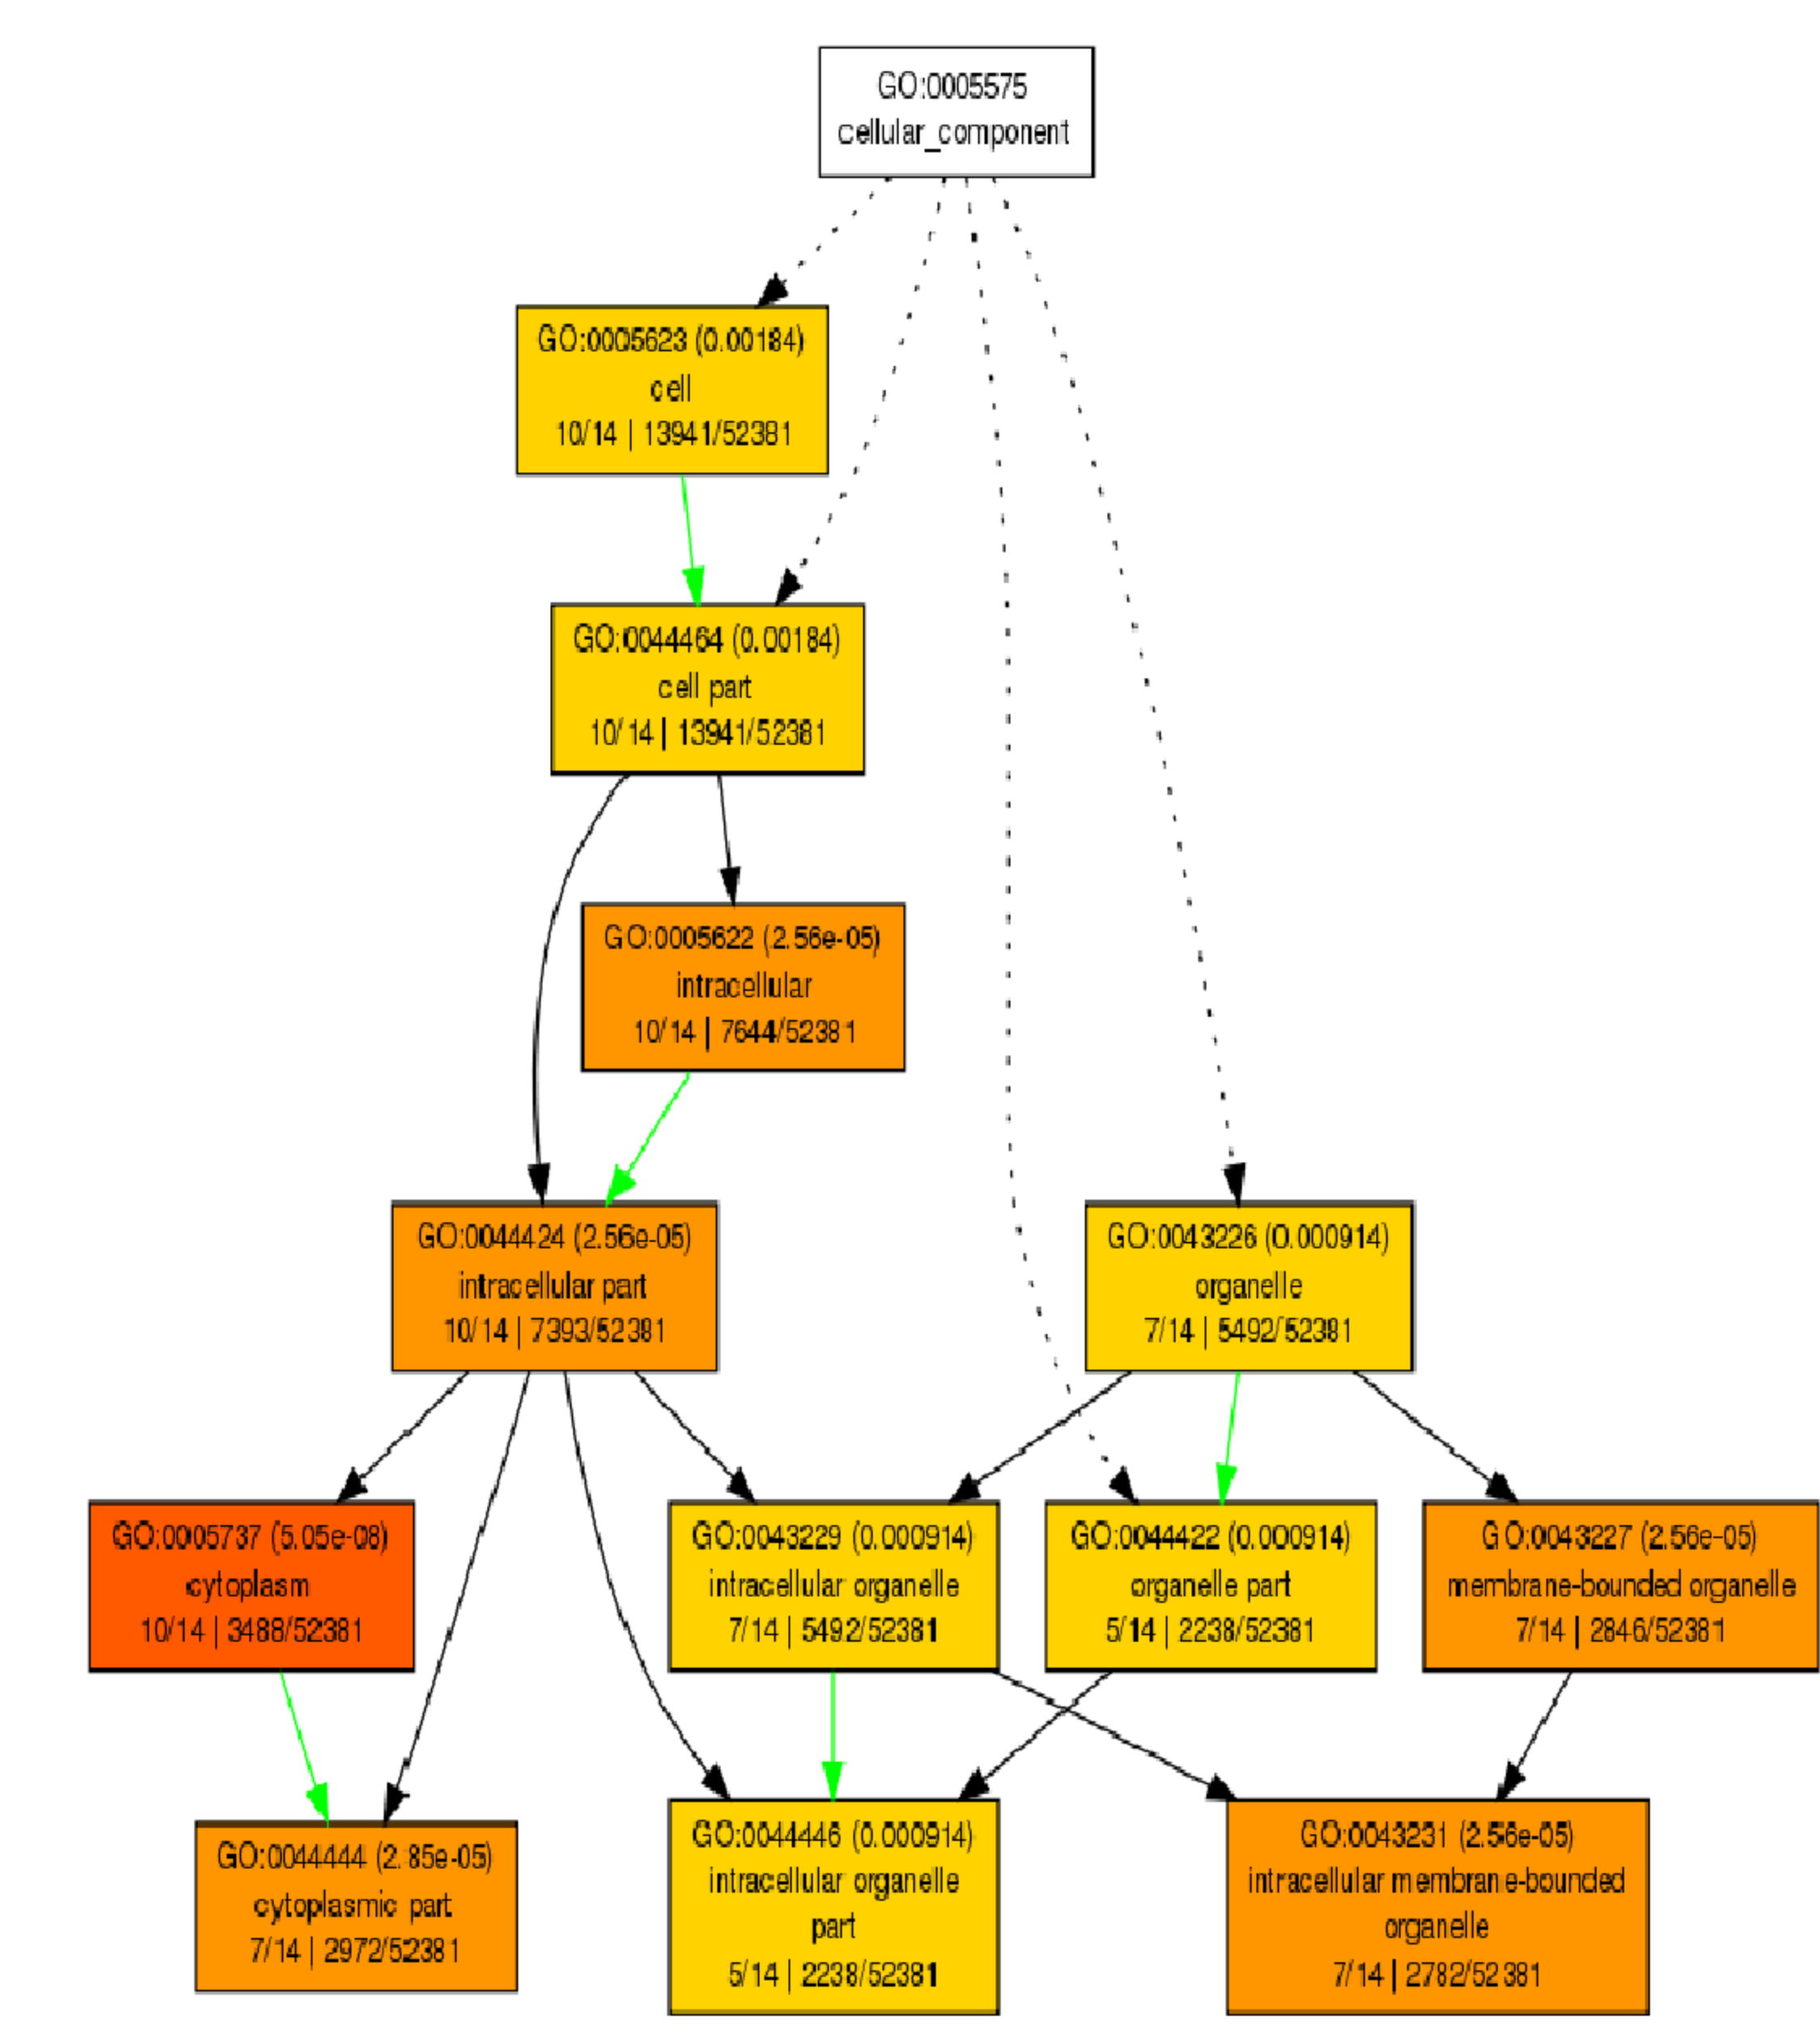

*TaHSP90*

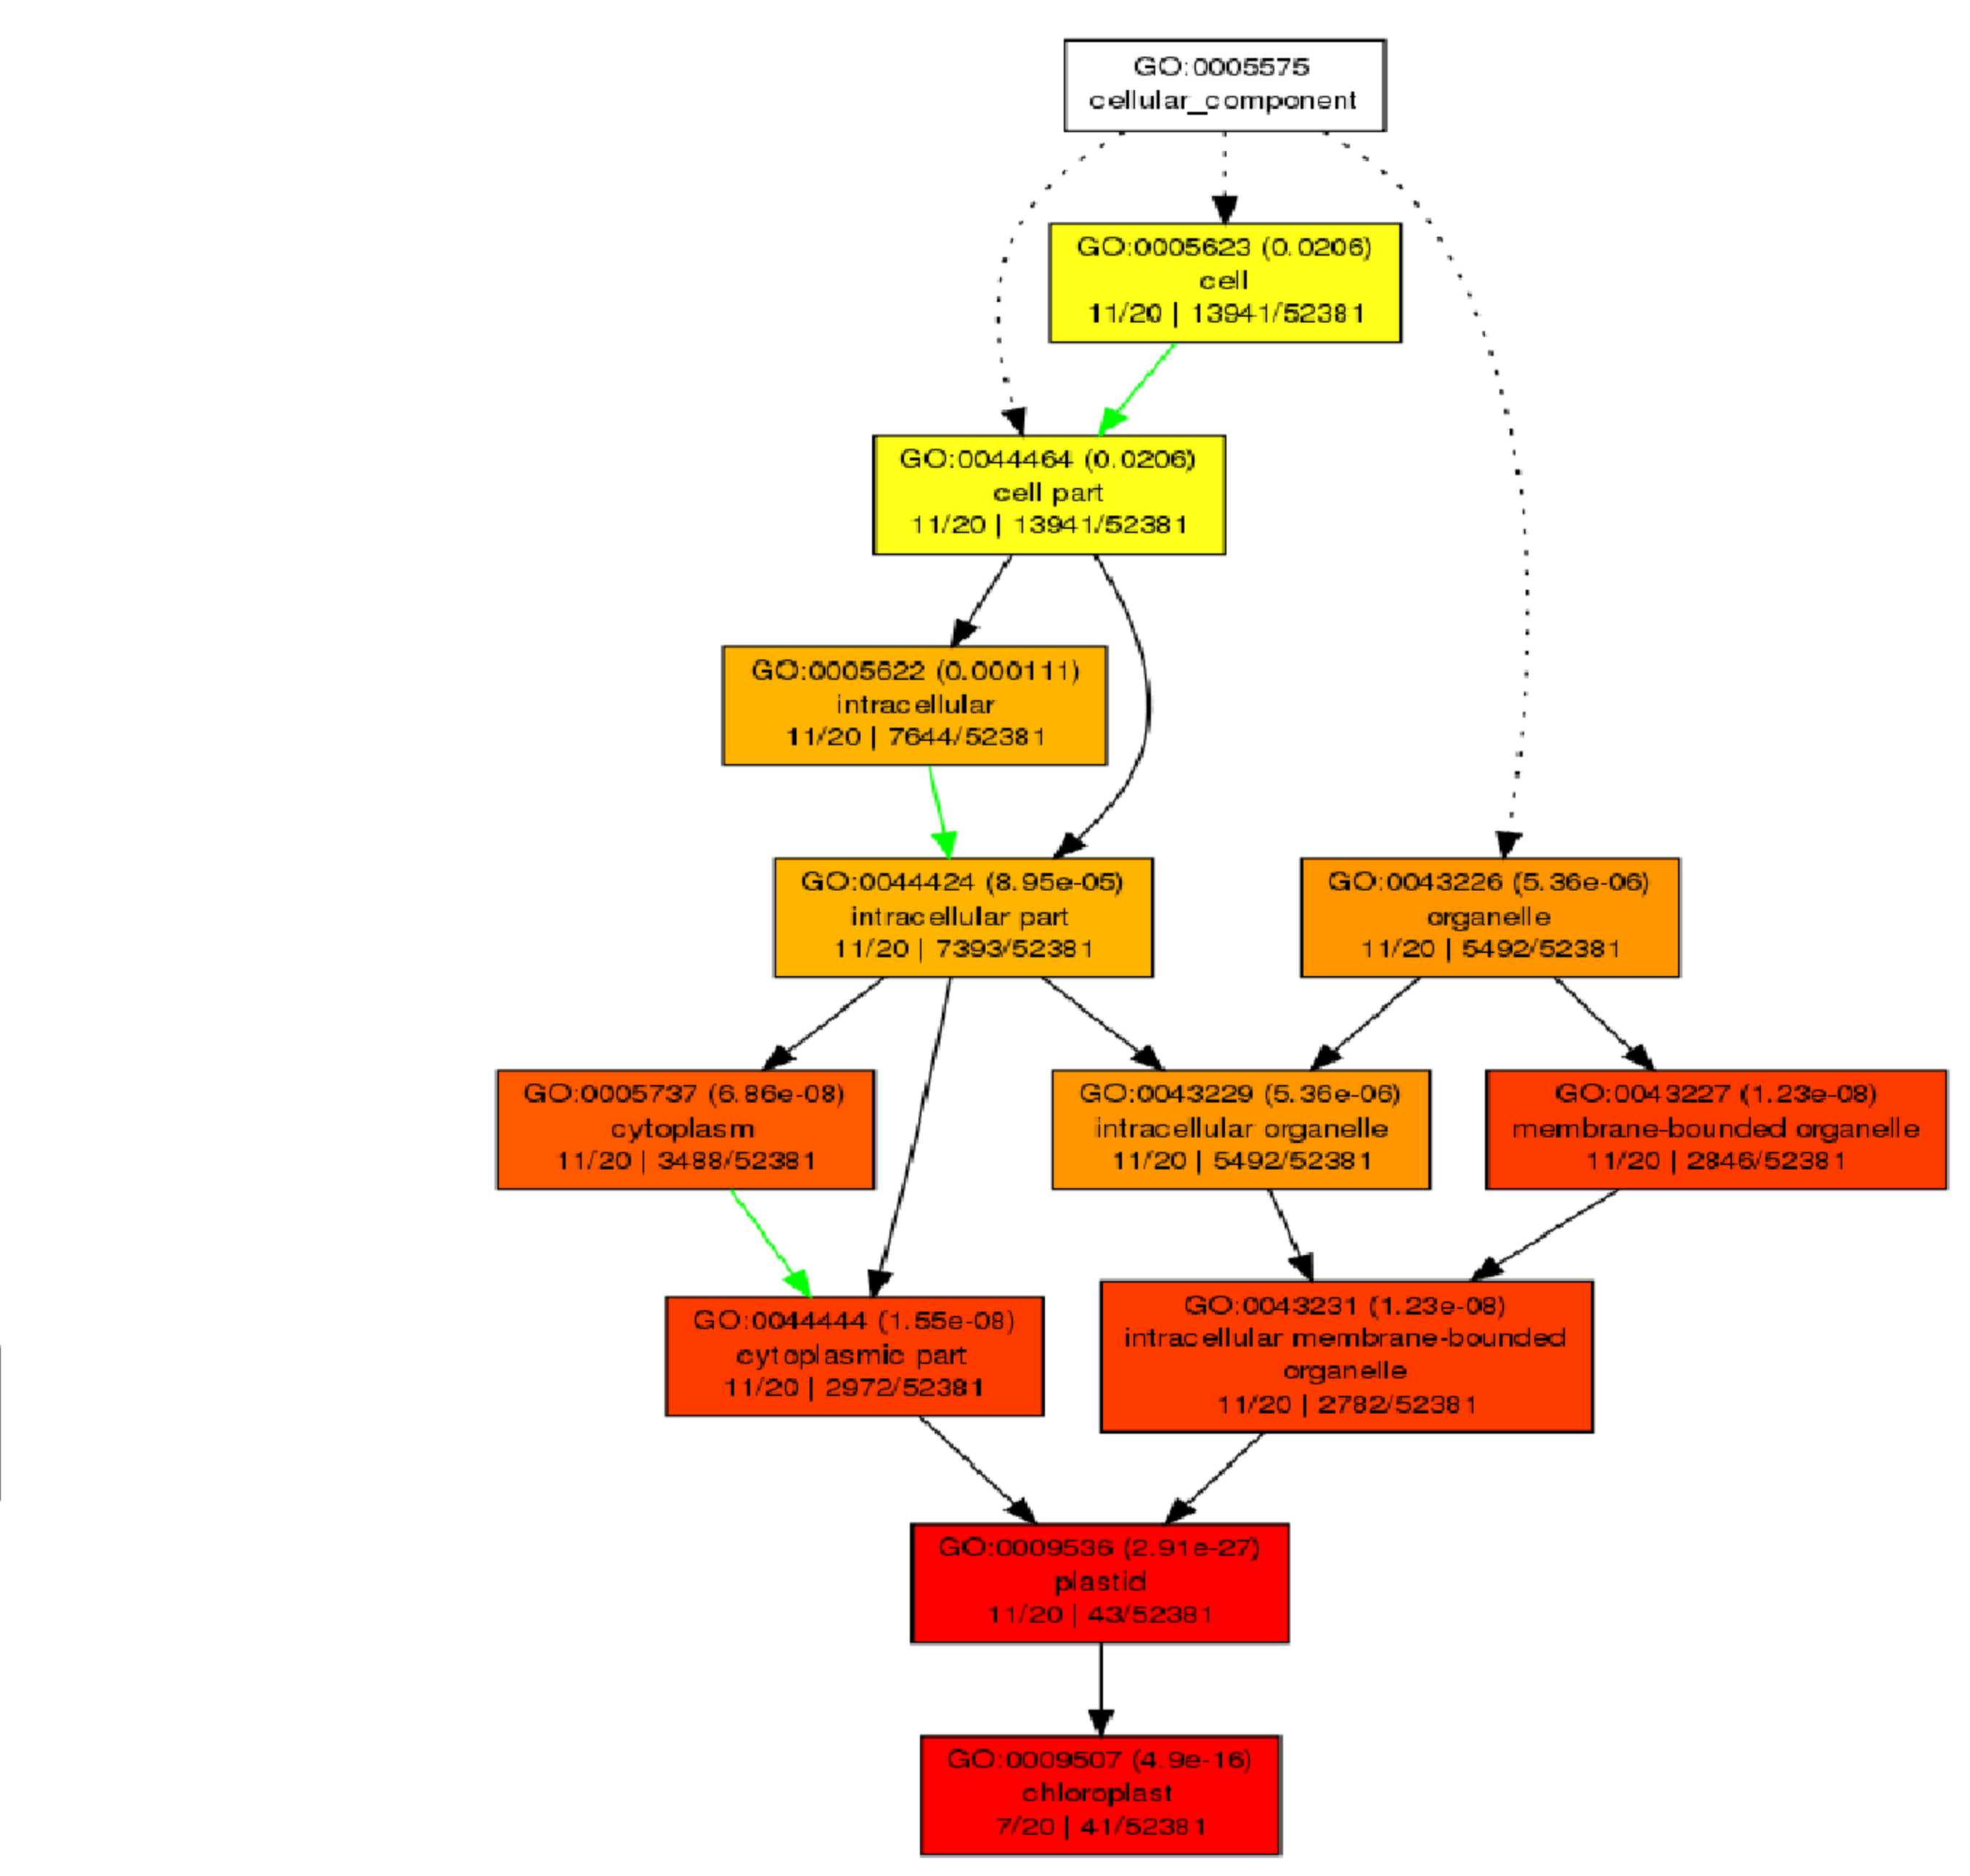

*TaHSP100*

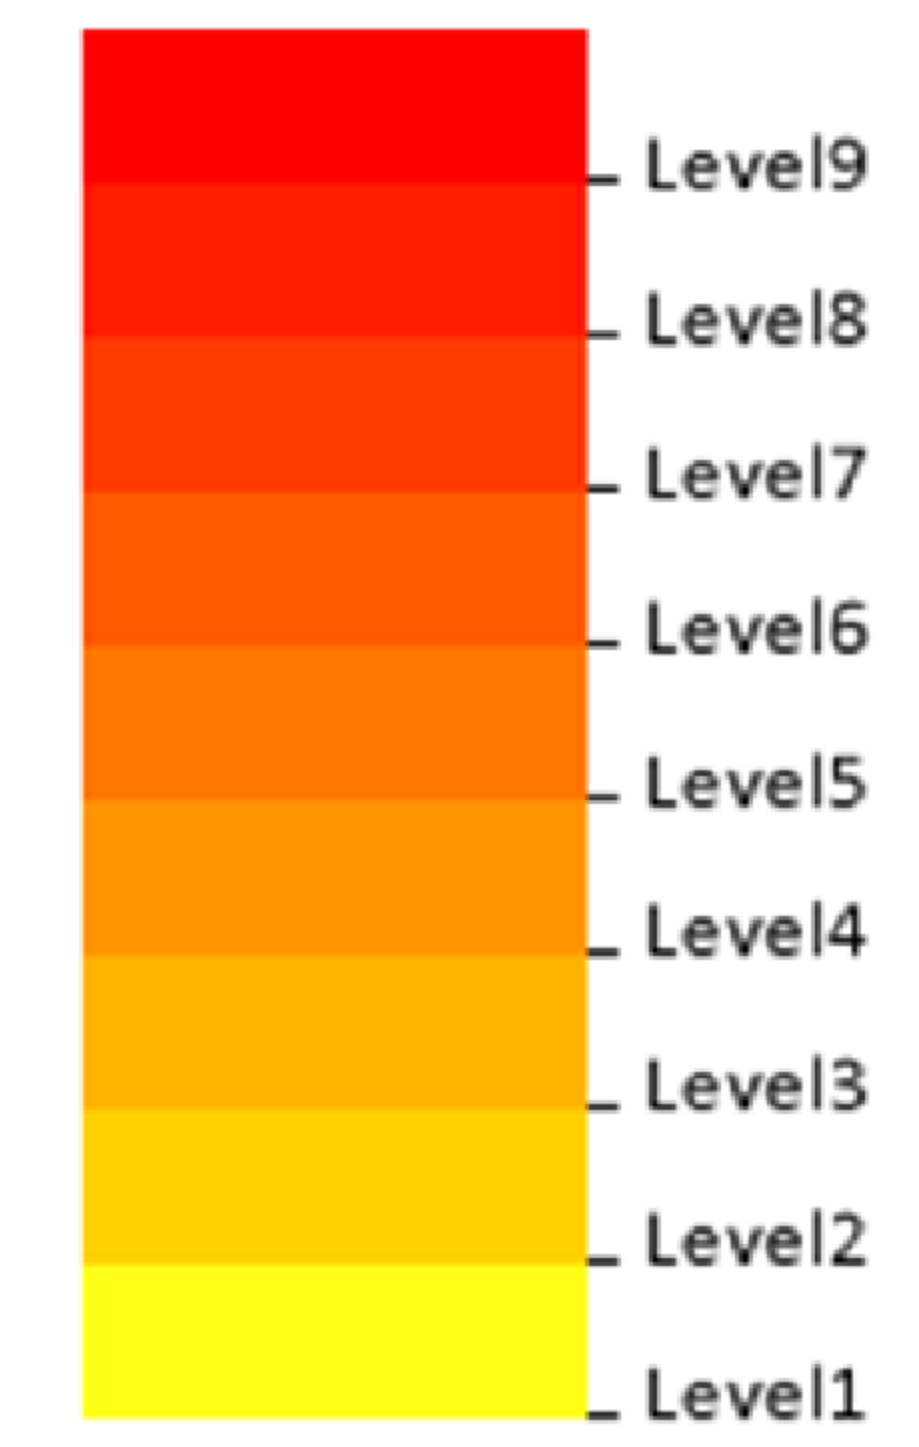

- is\_a
- part\_of
- positive\_regulate
- regulate
- negative\_regulate
- two significant nodes
- one significant node

*TaHSP*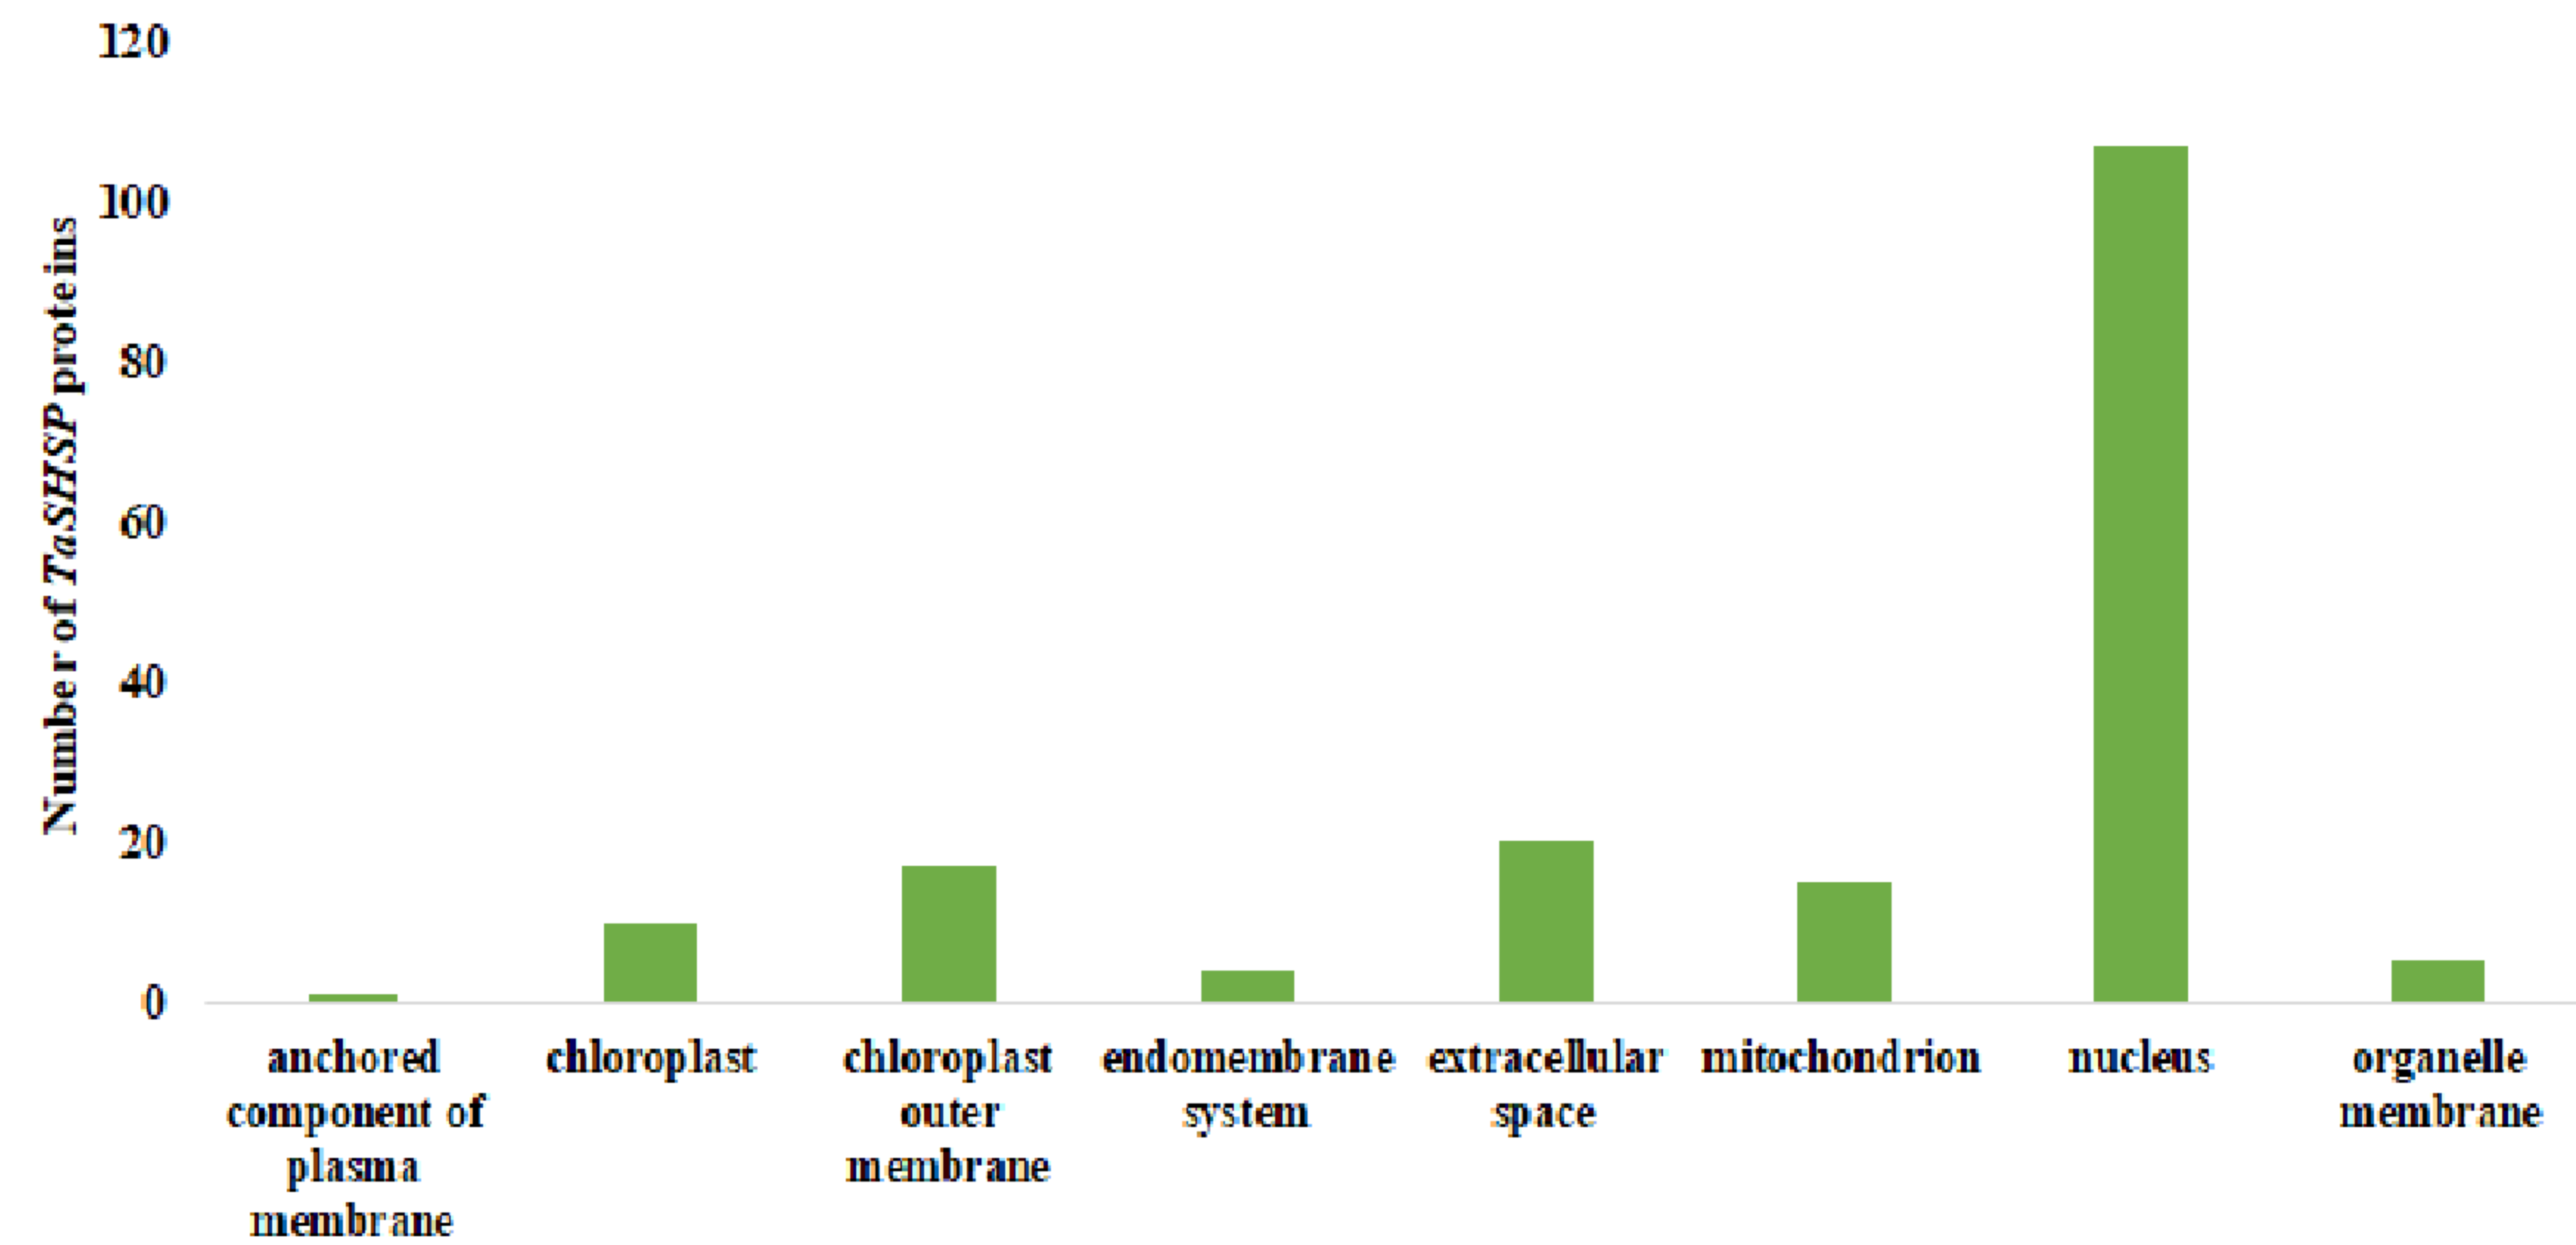*TaHSP40*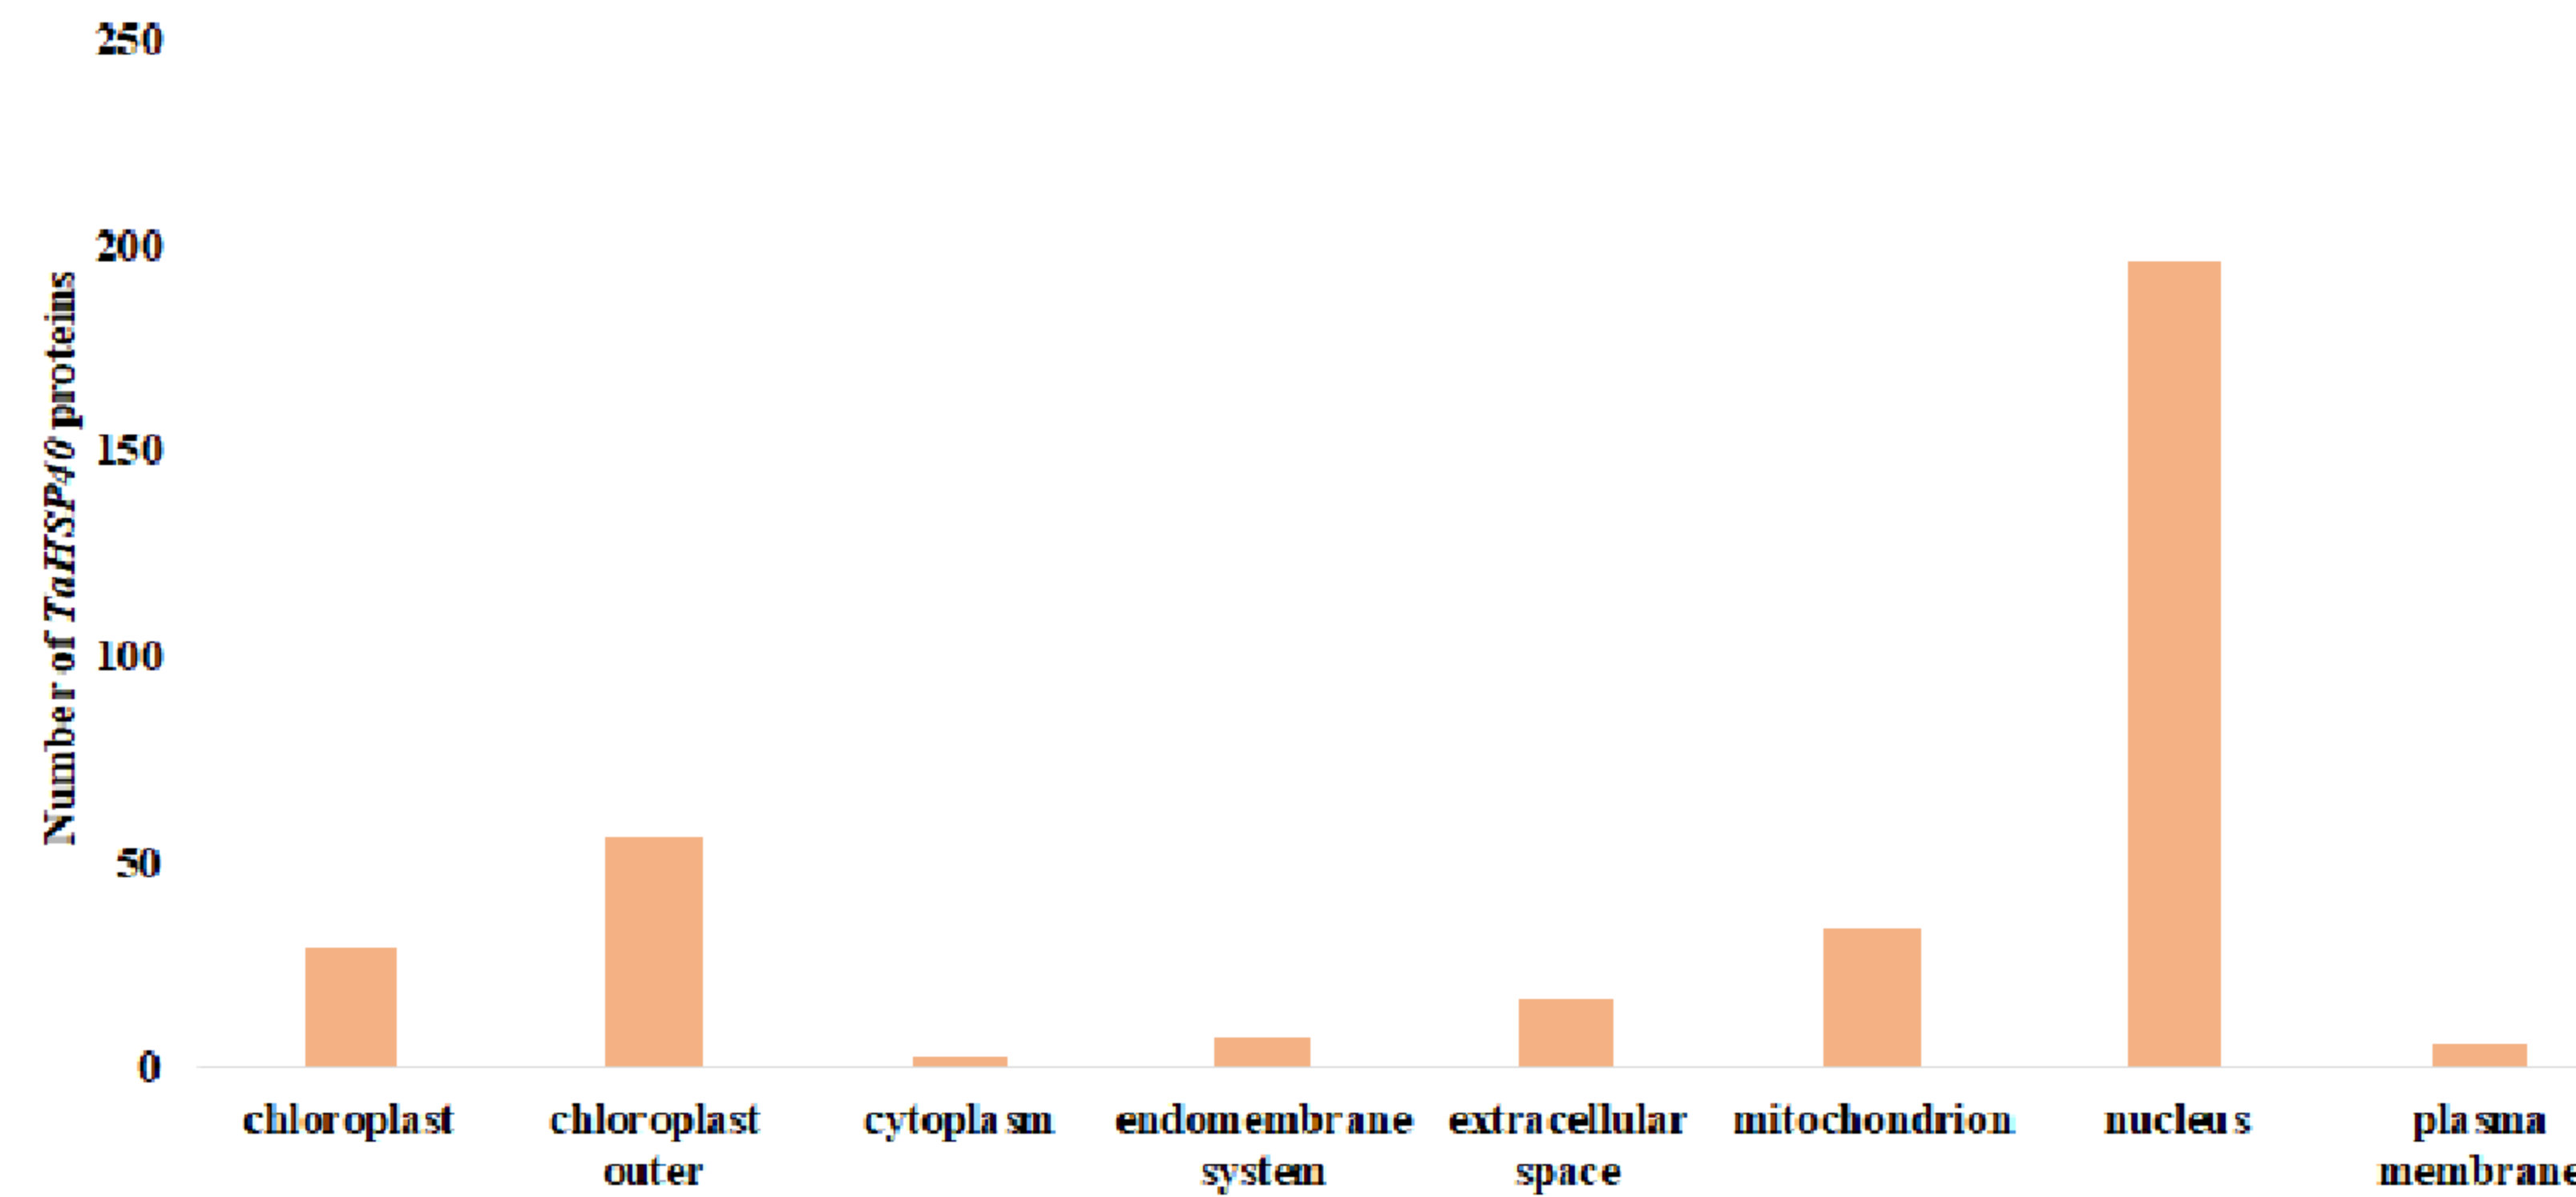*TaHSP60*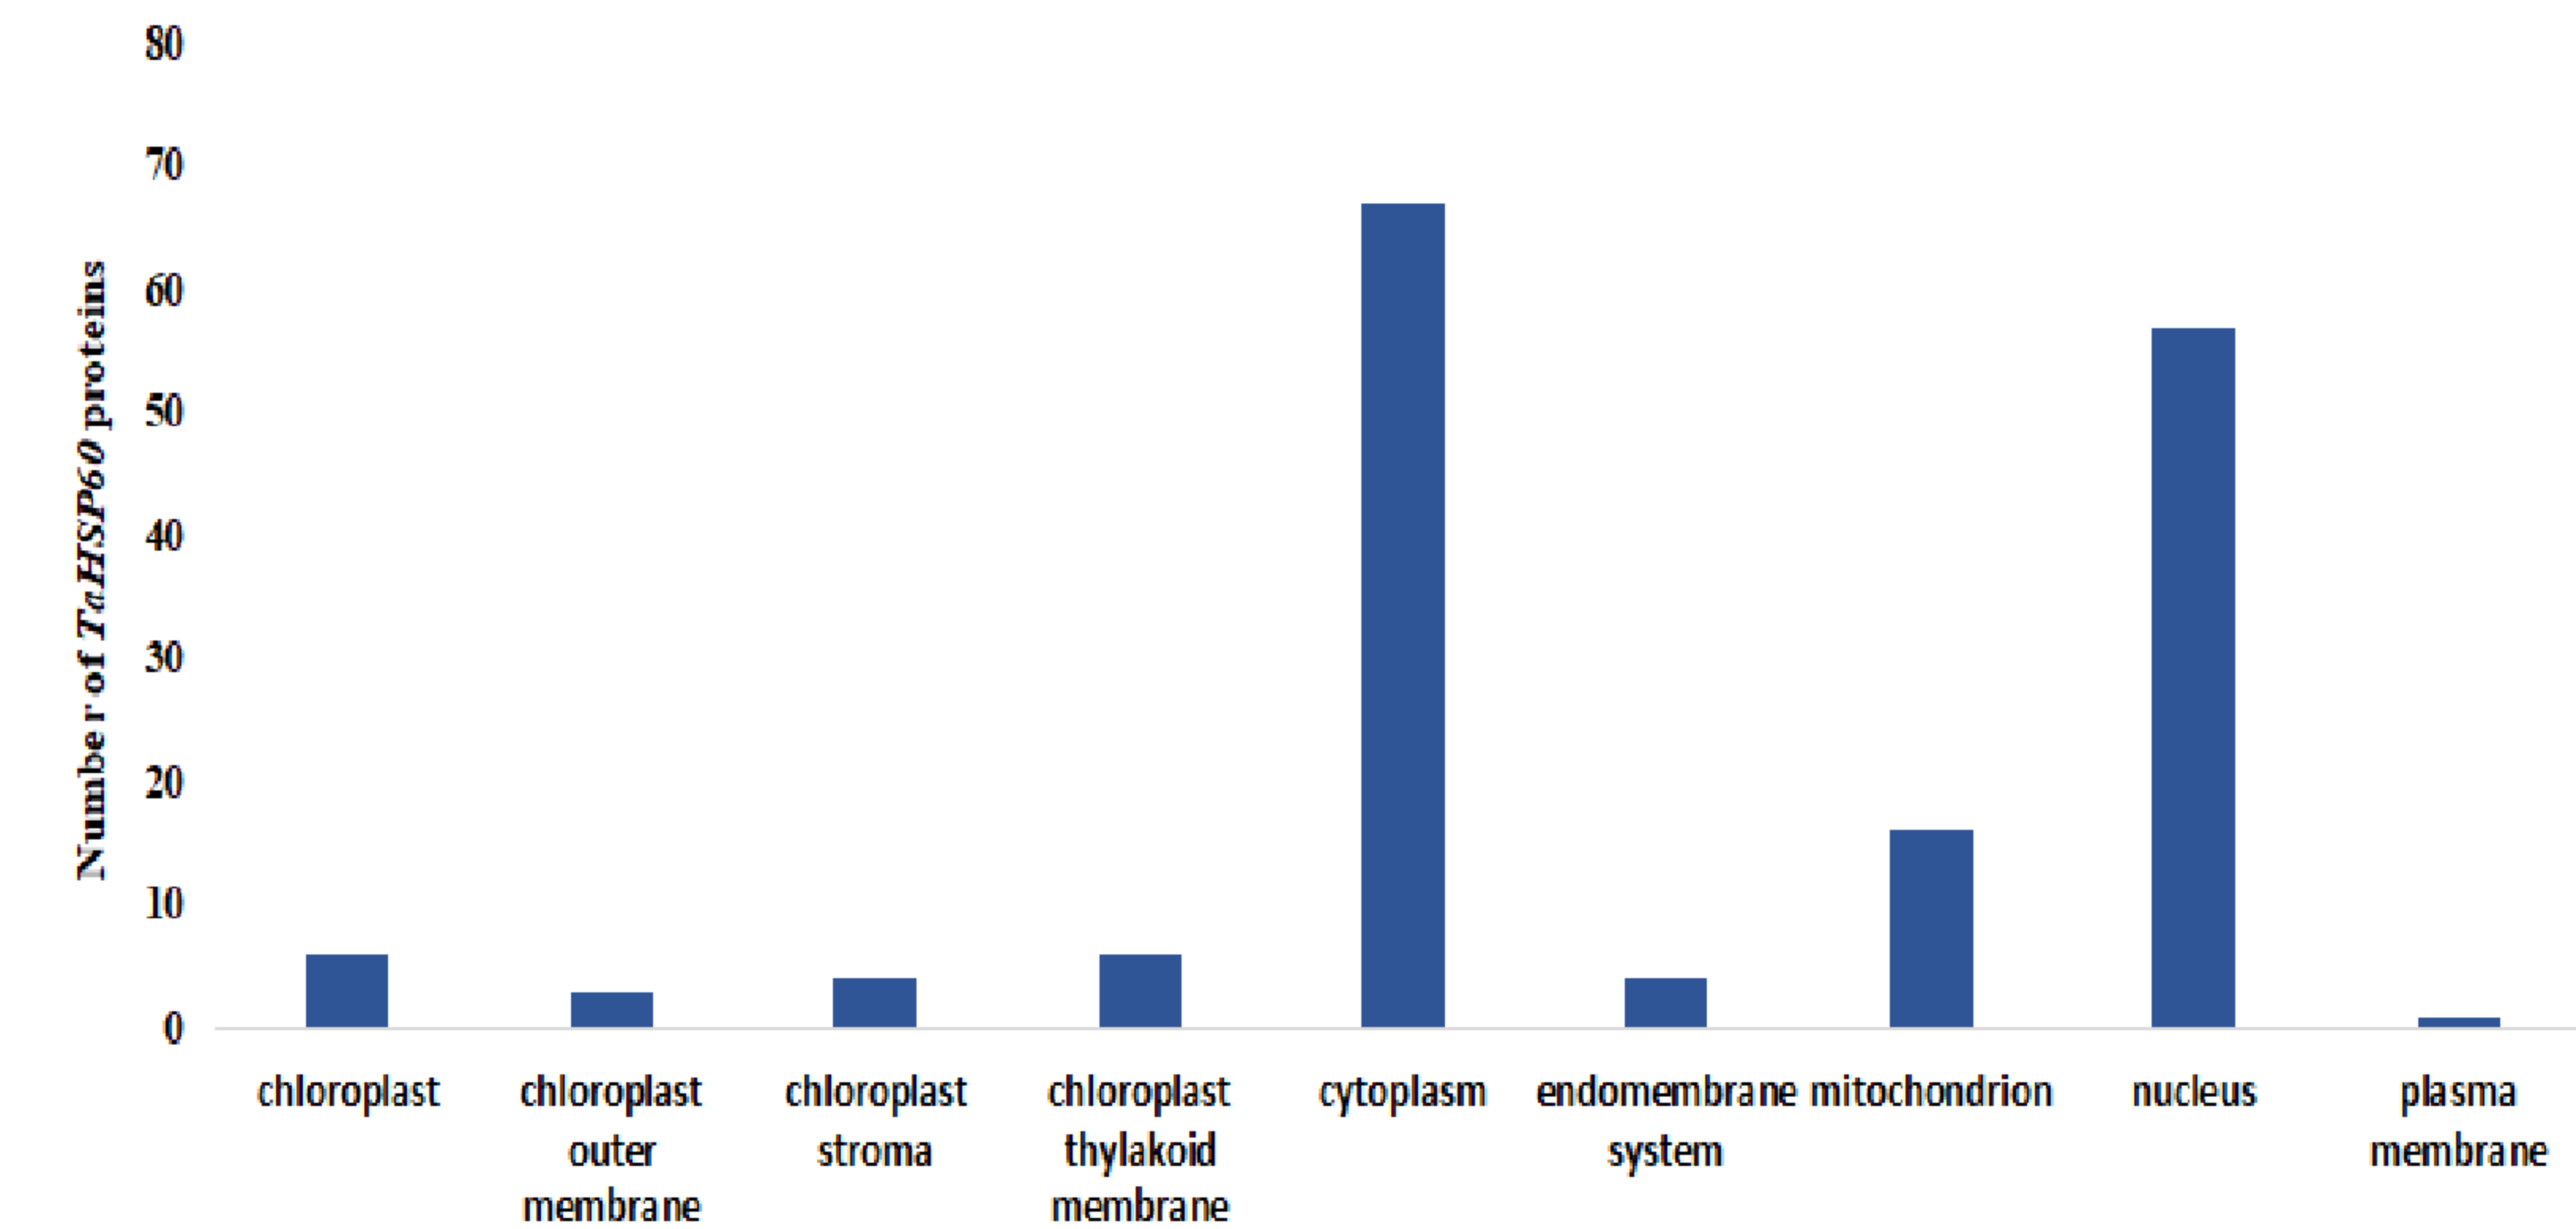*TaHSP70*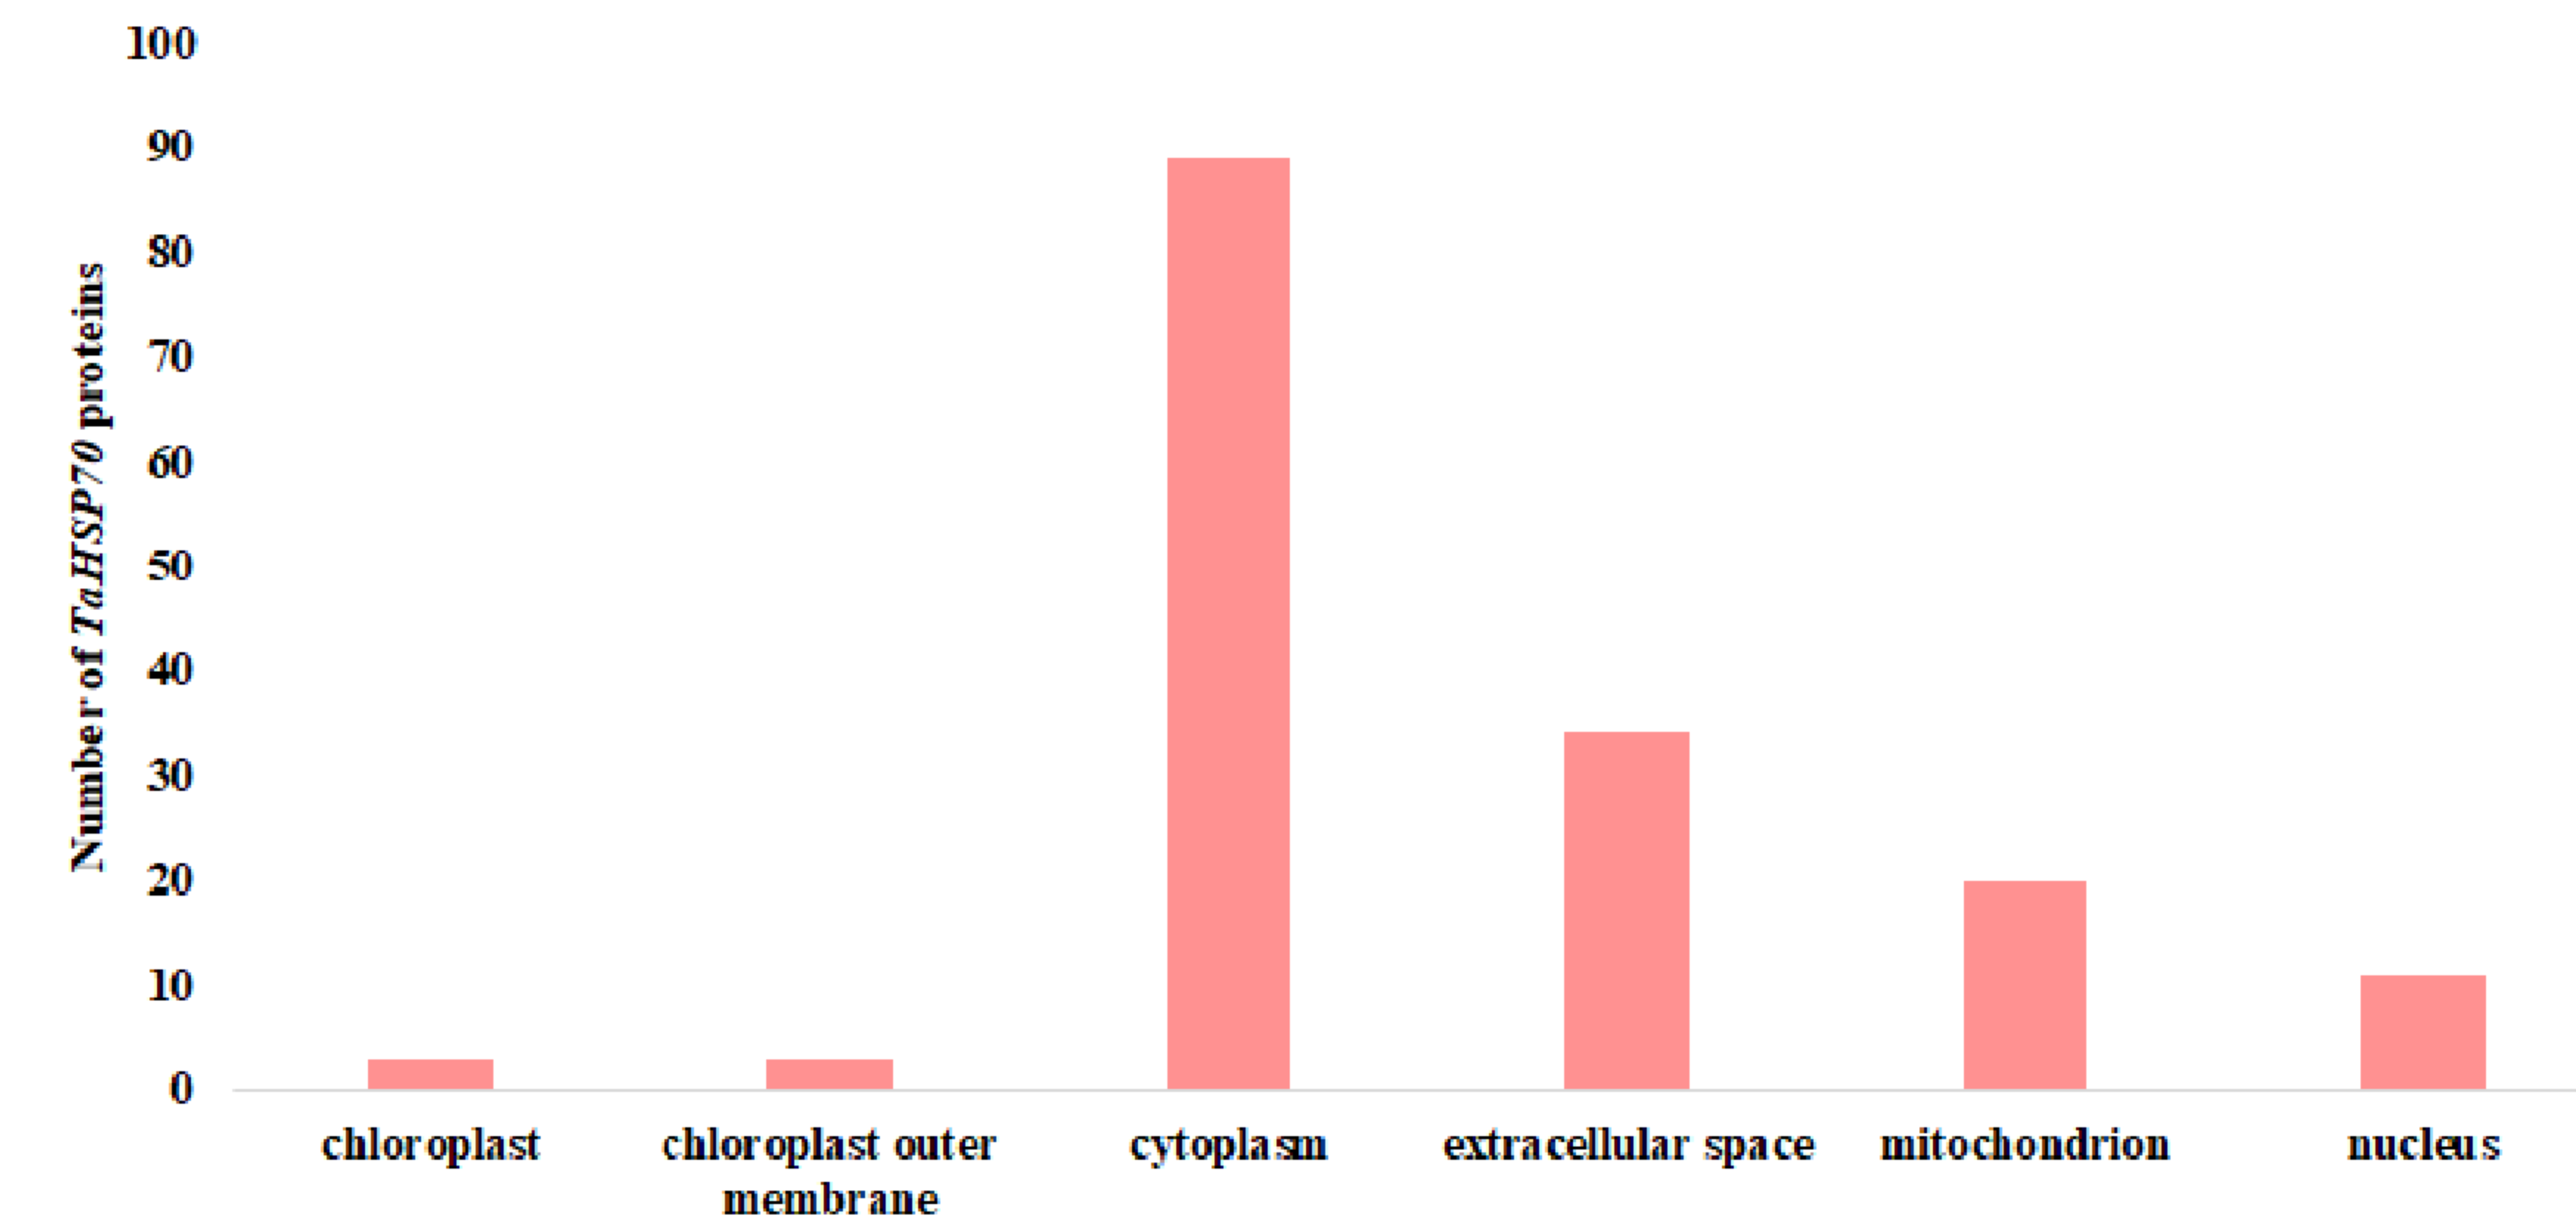*TaHSP90*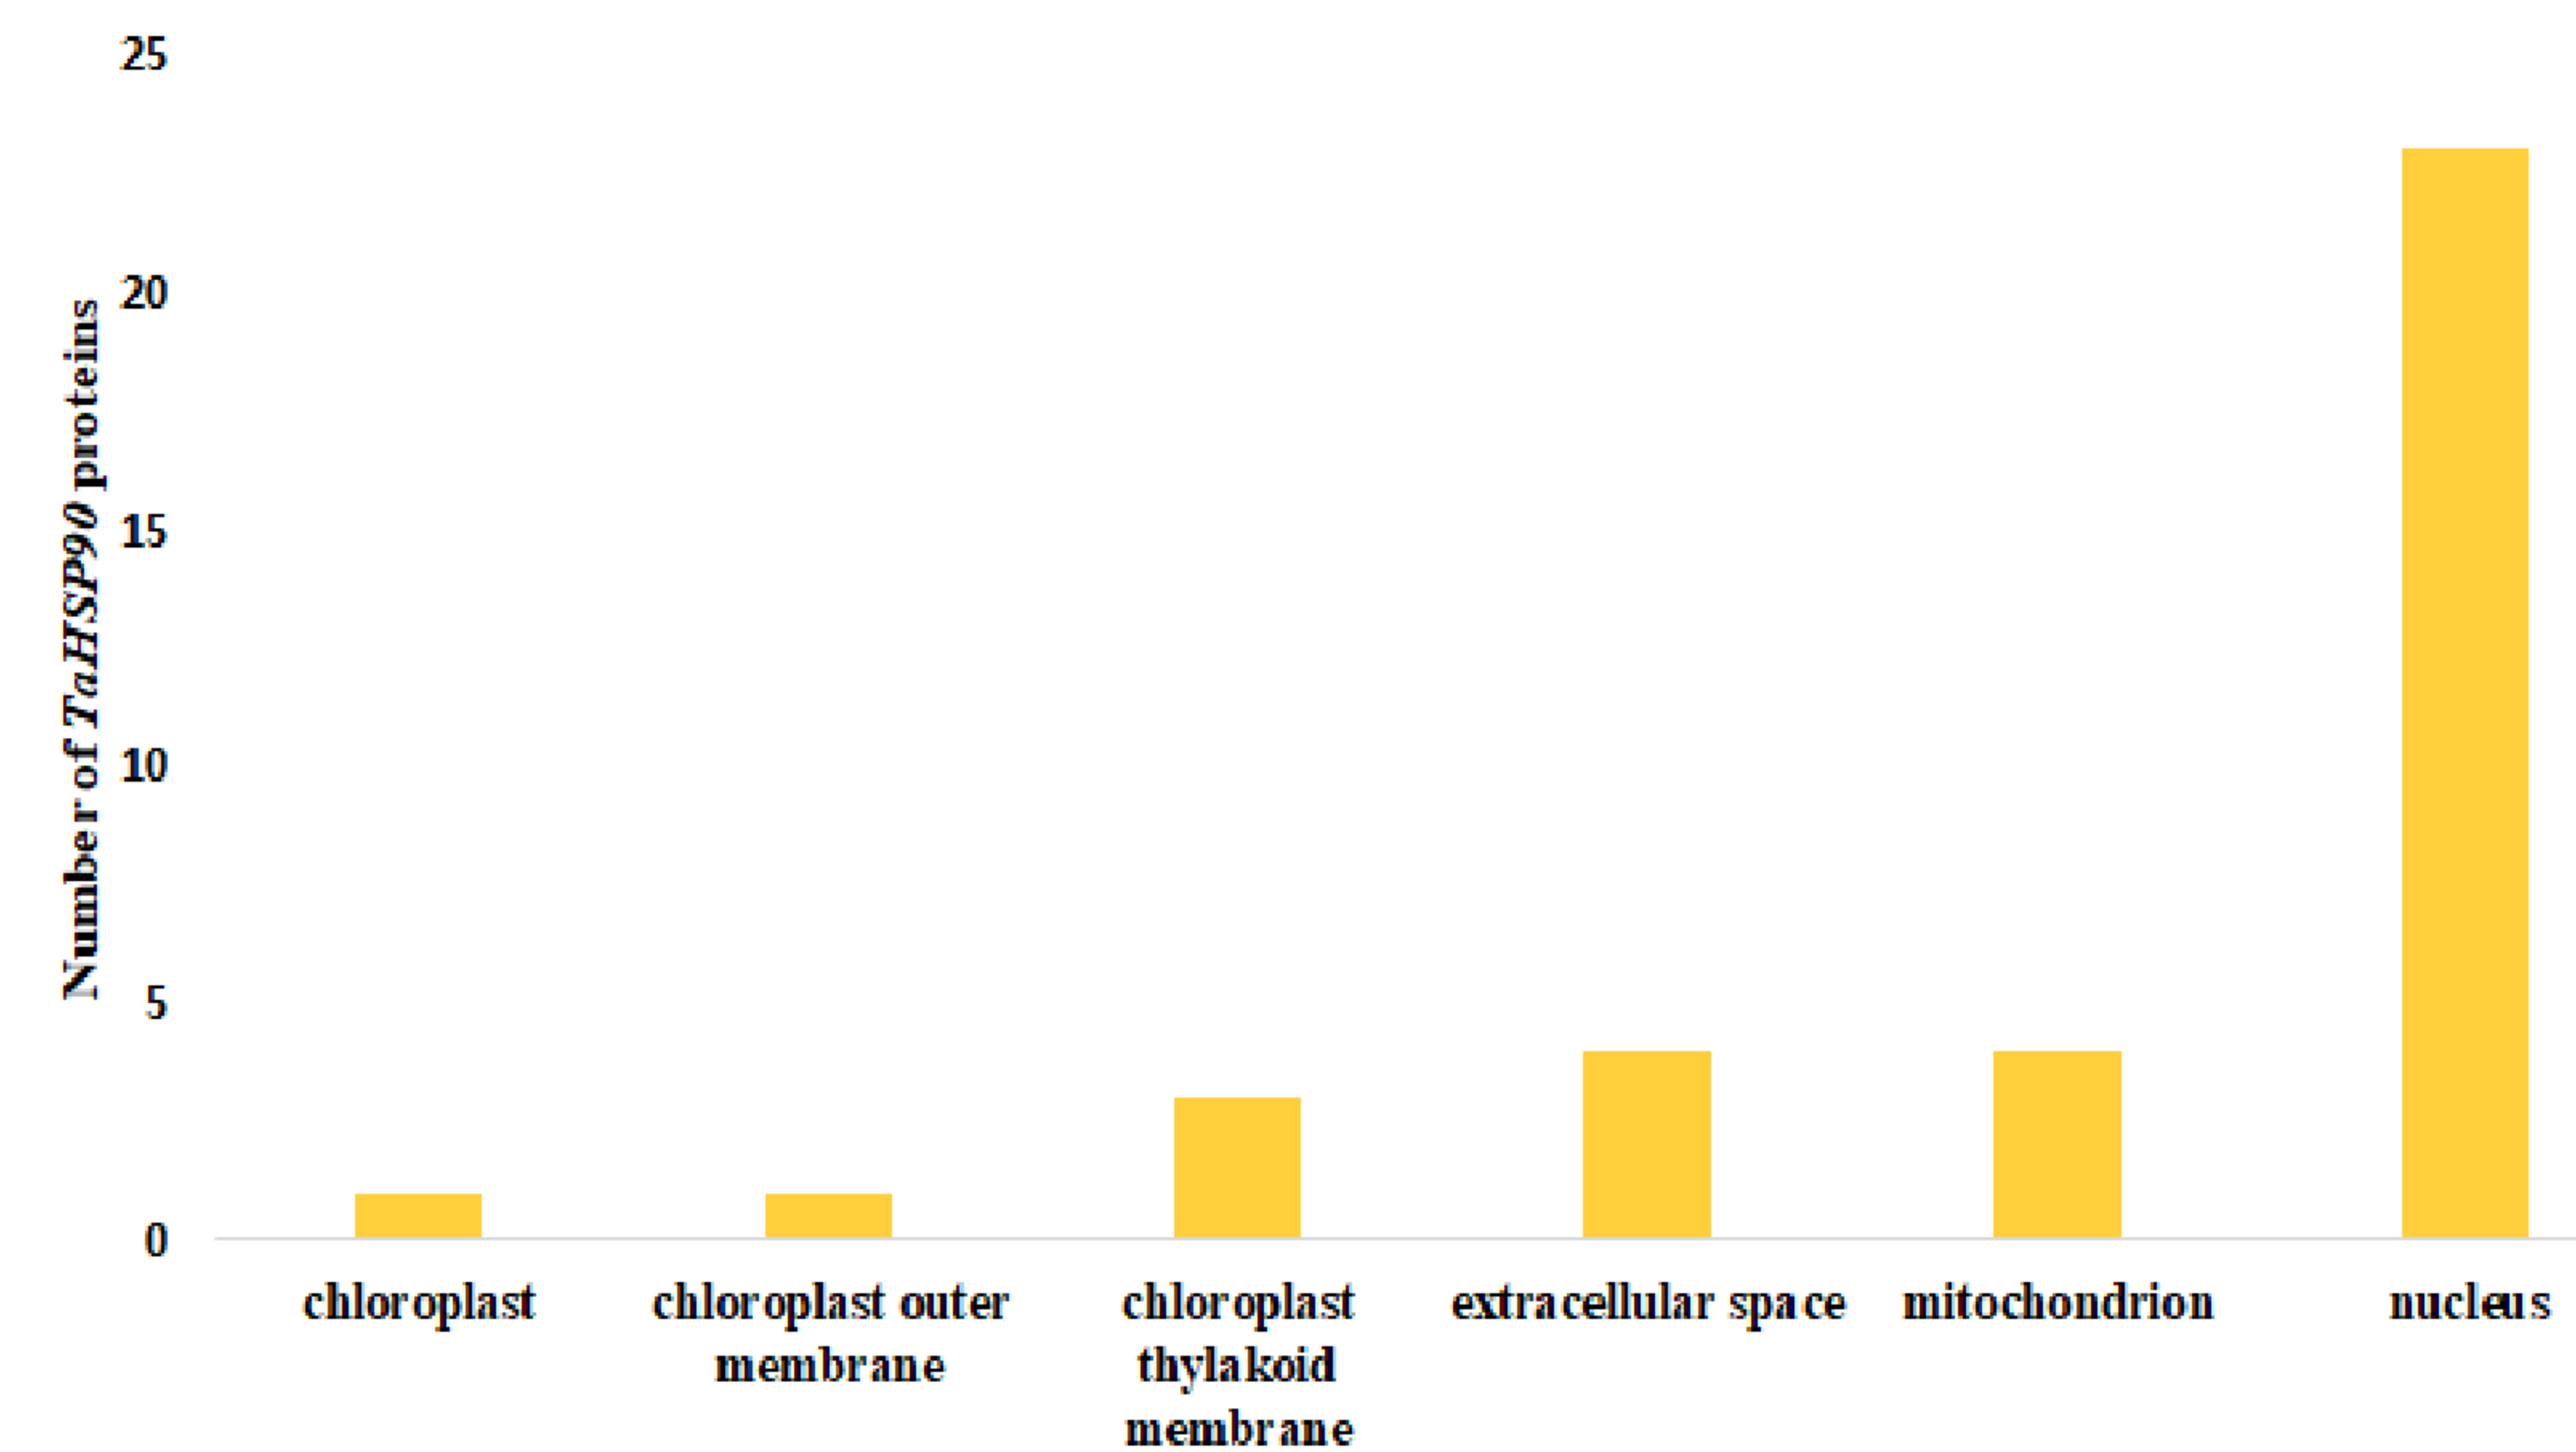*TaHSP100*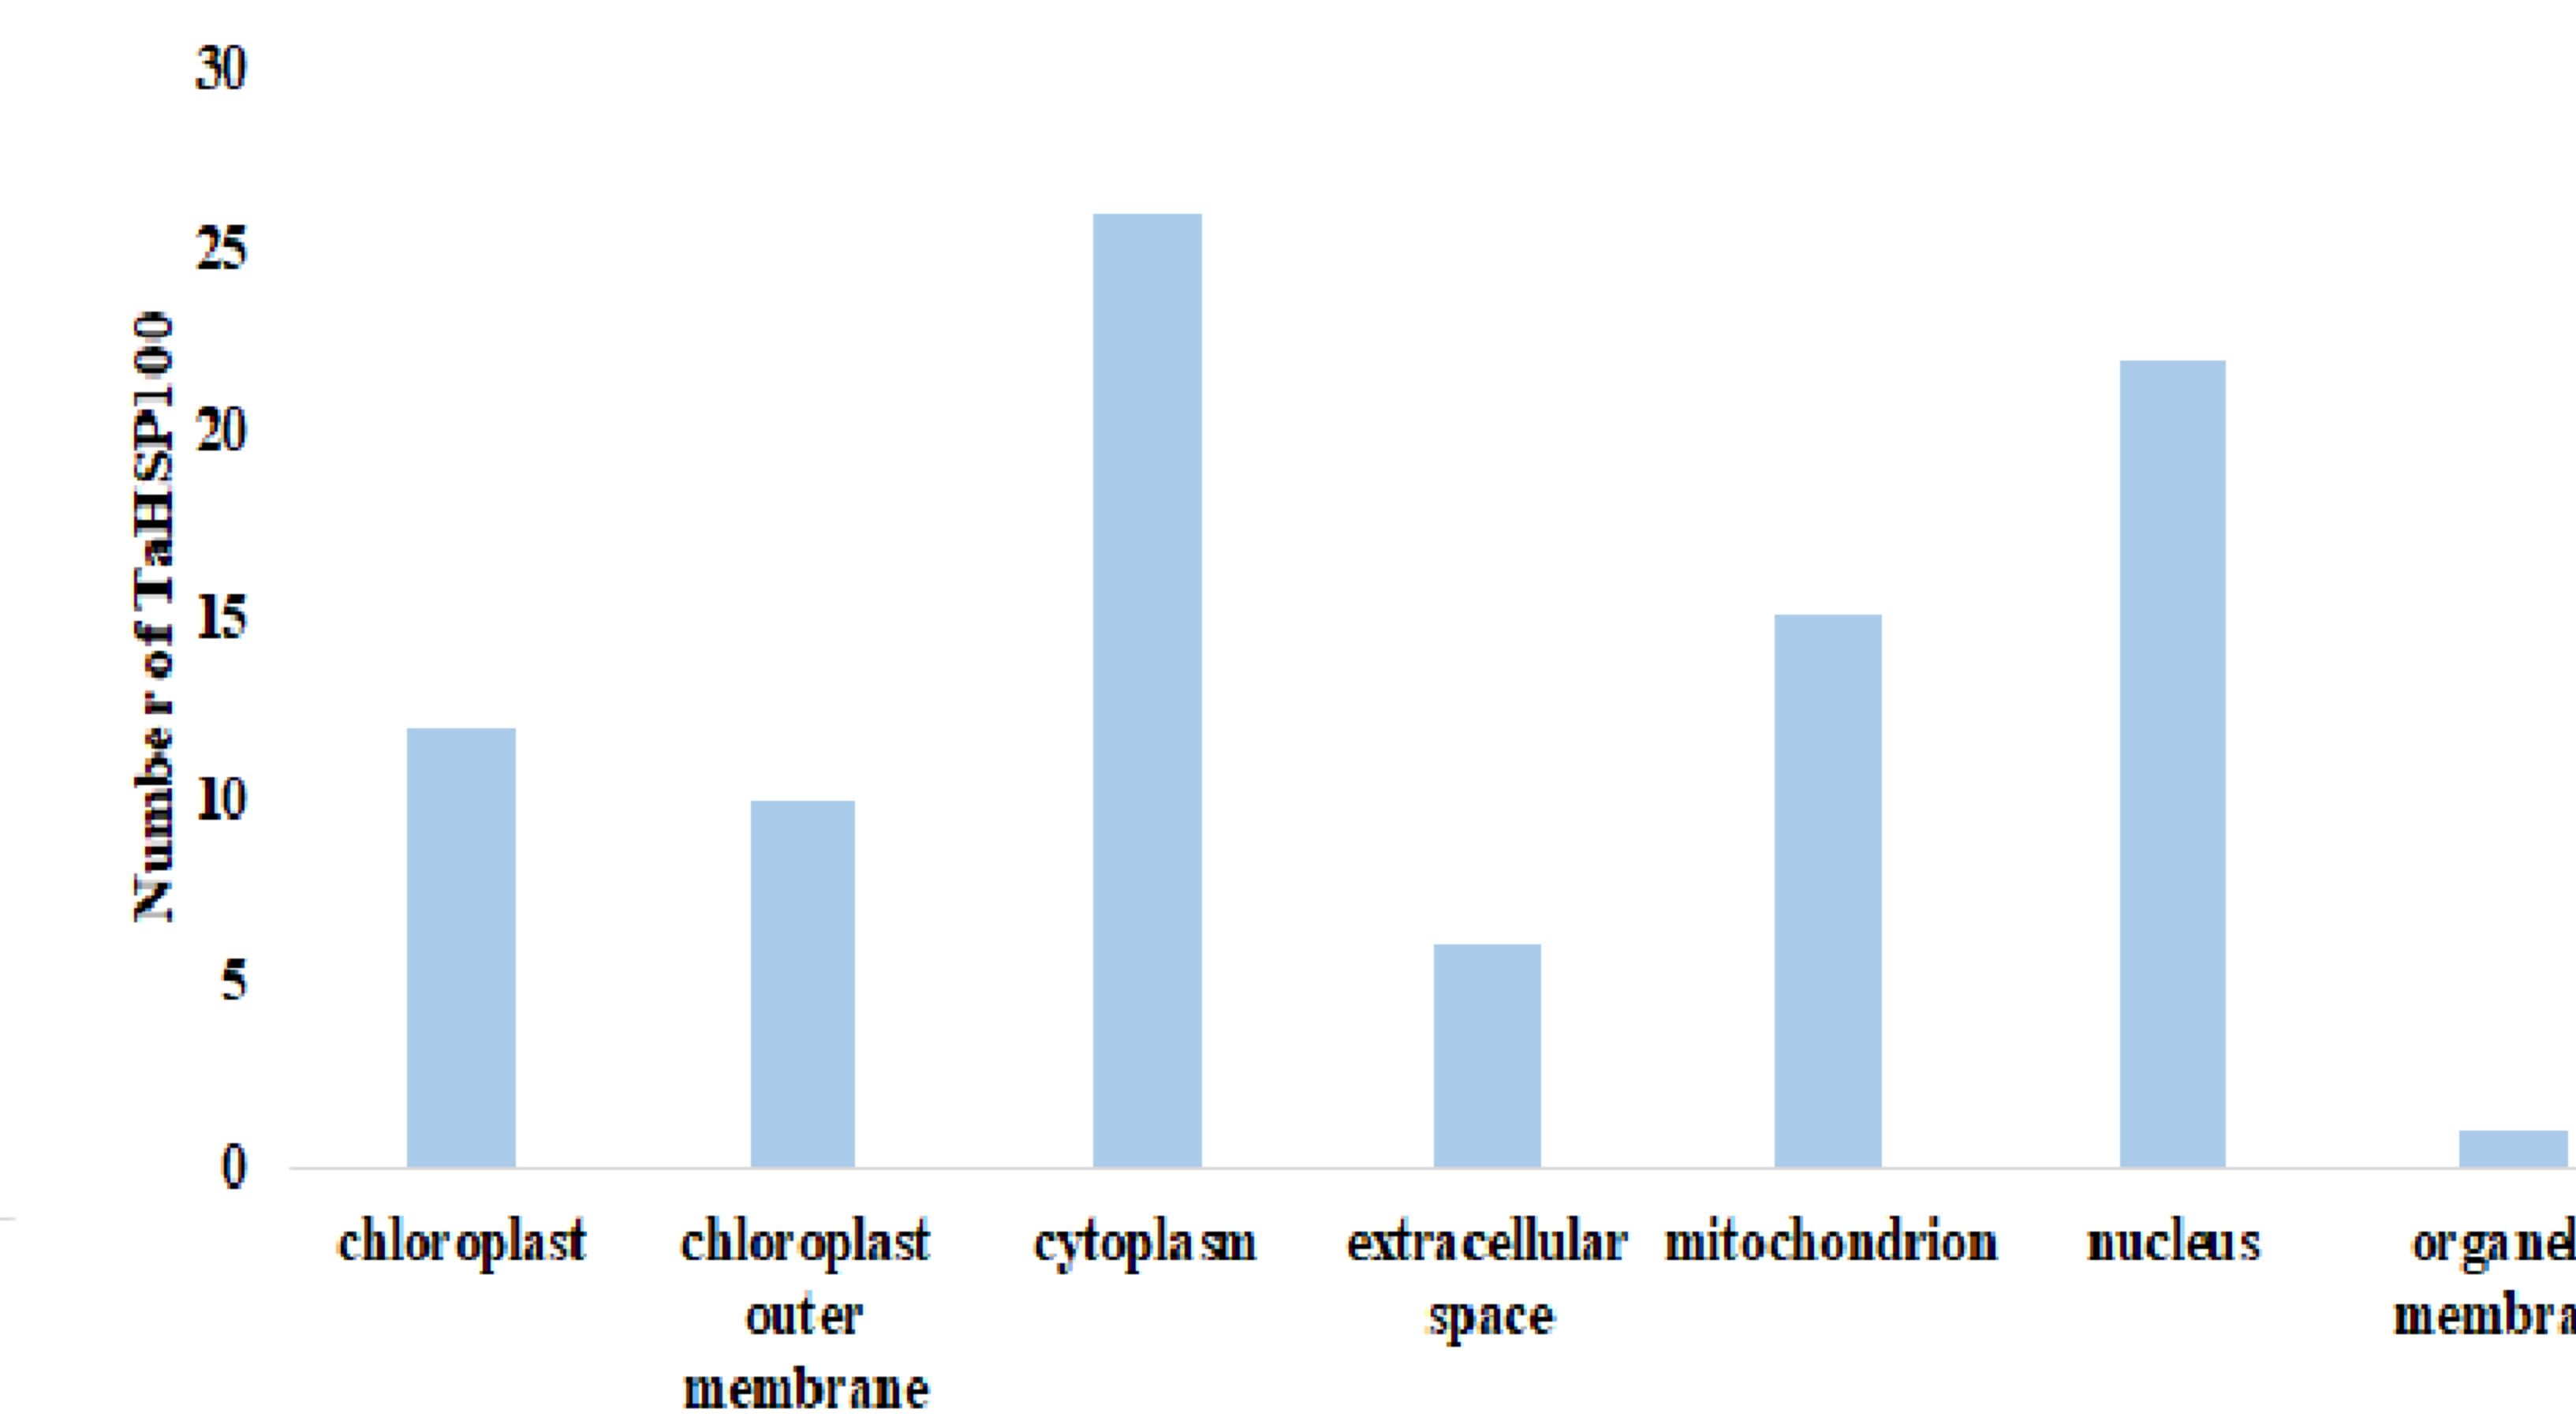





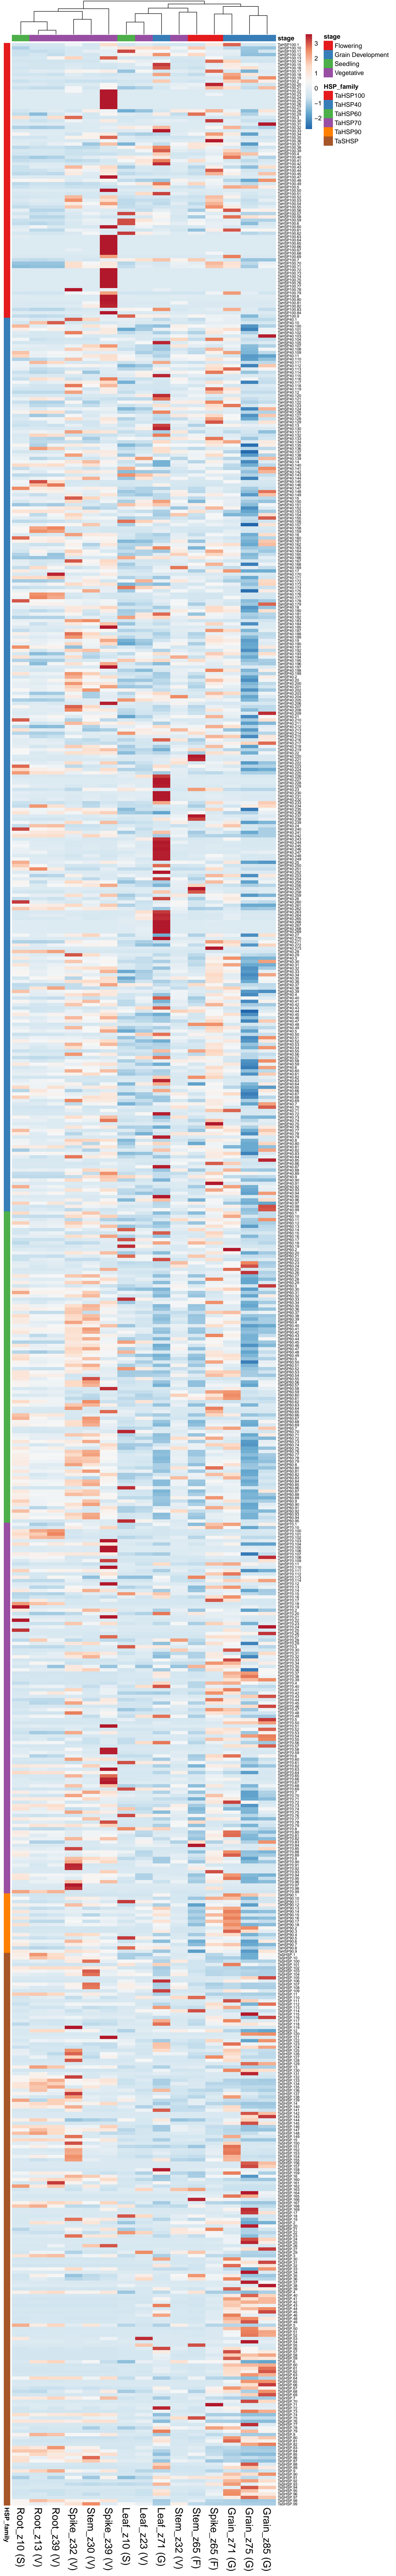



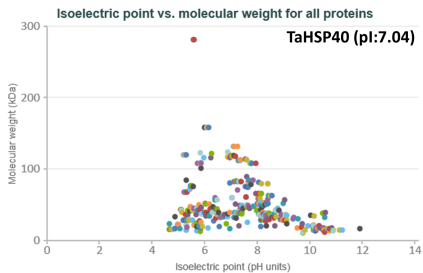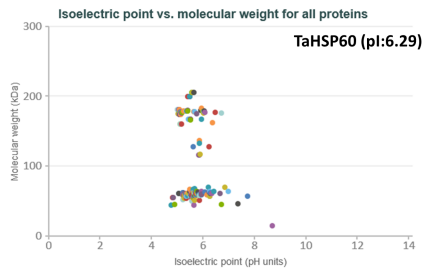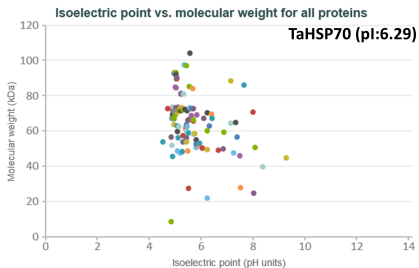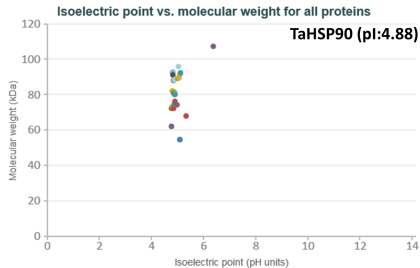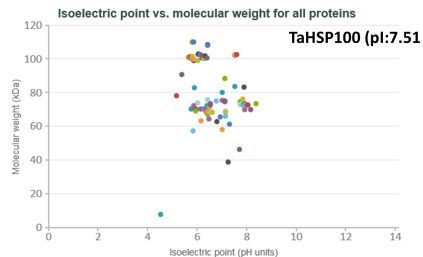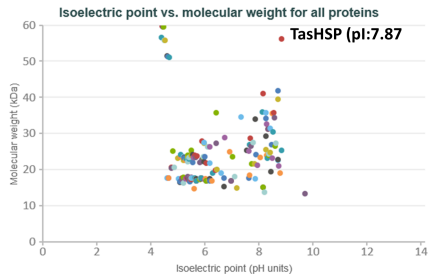

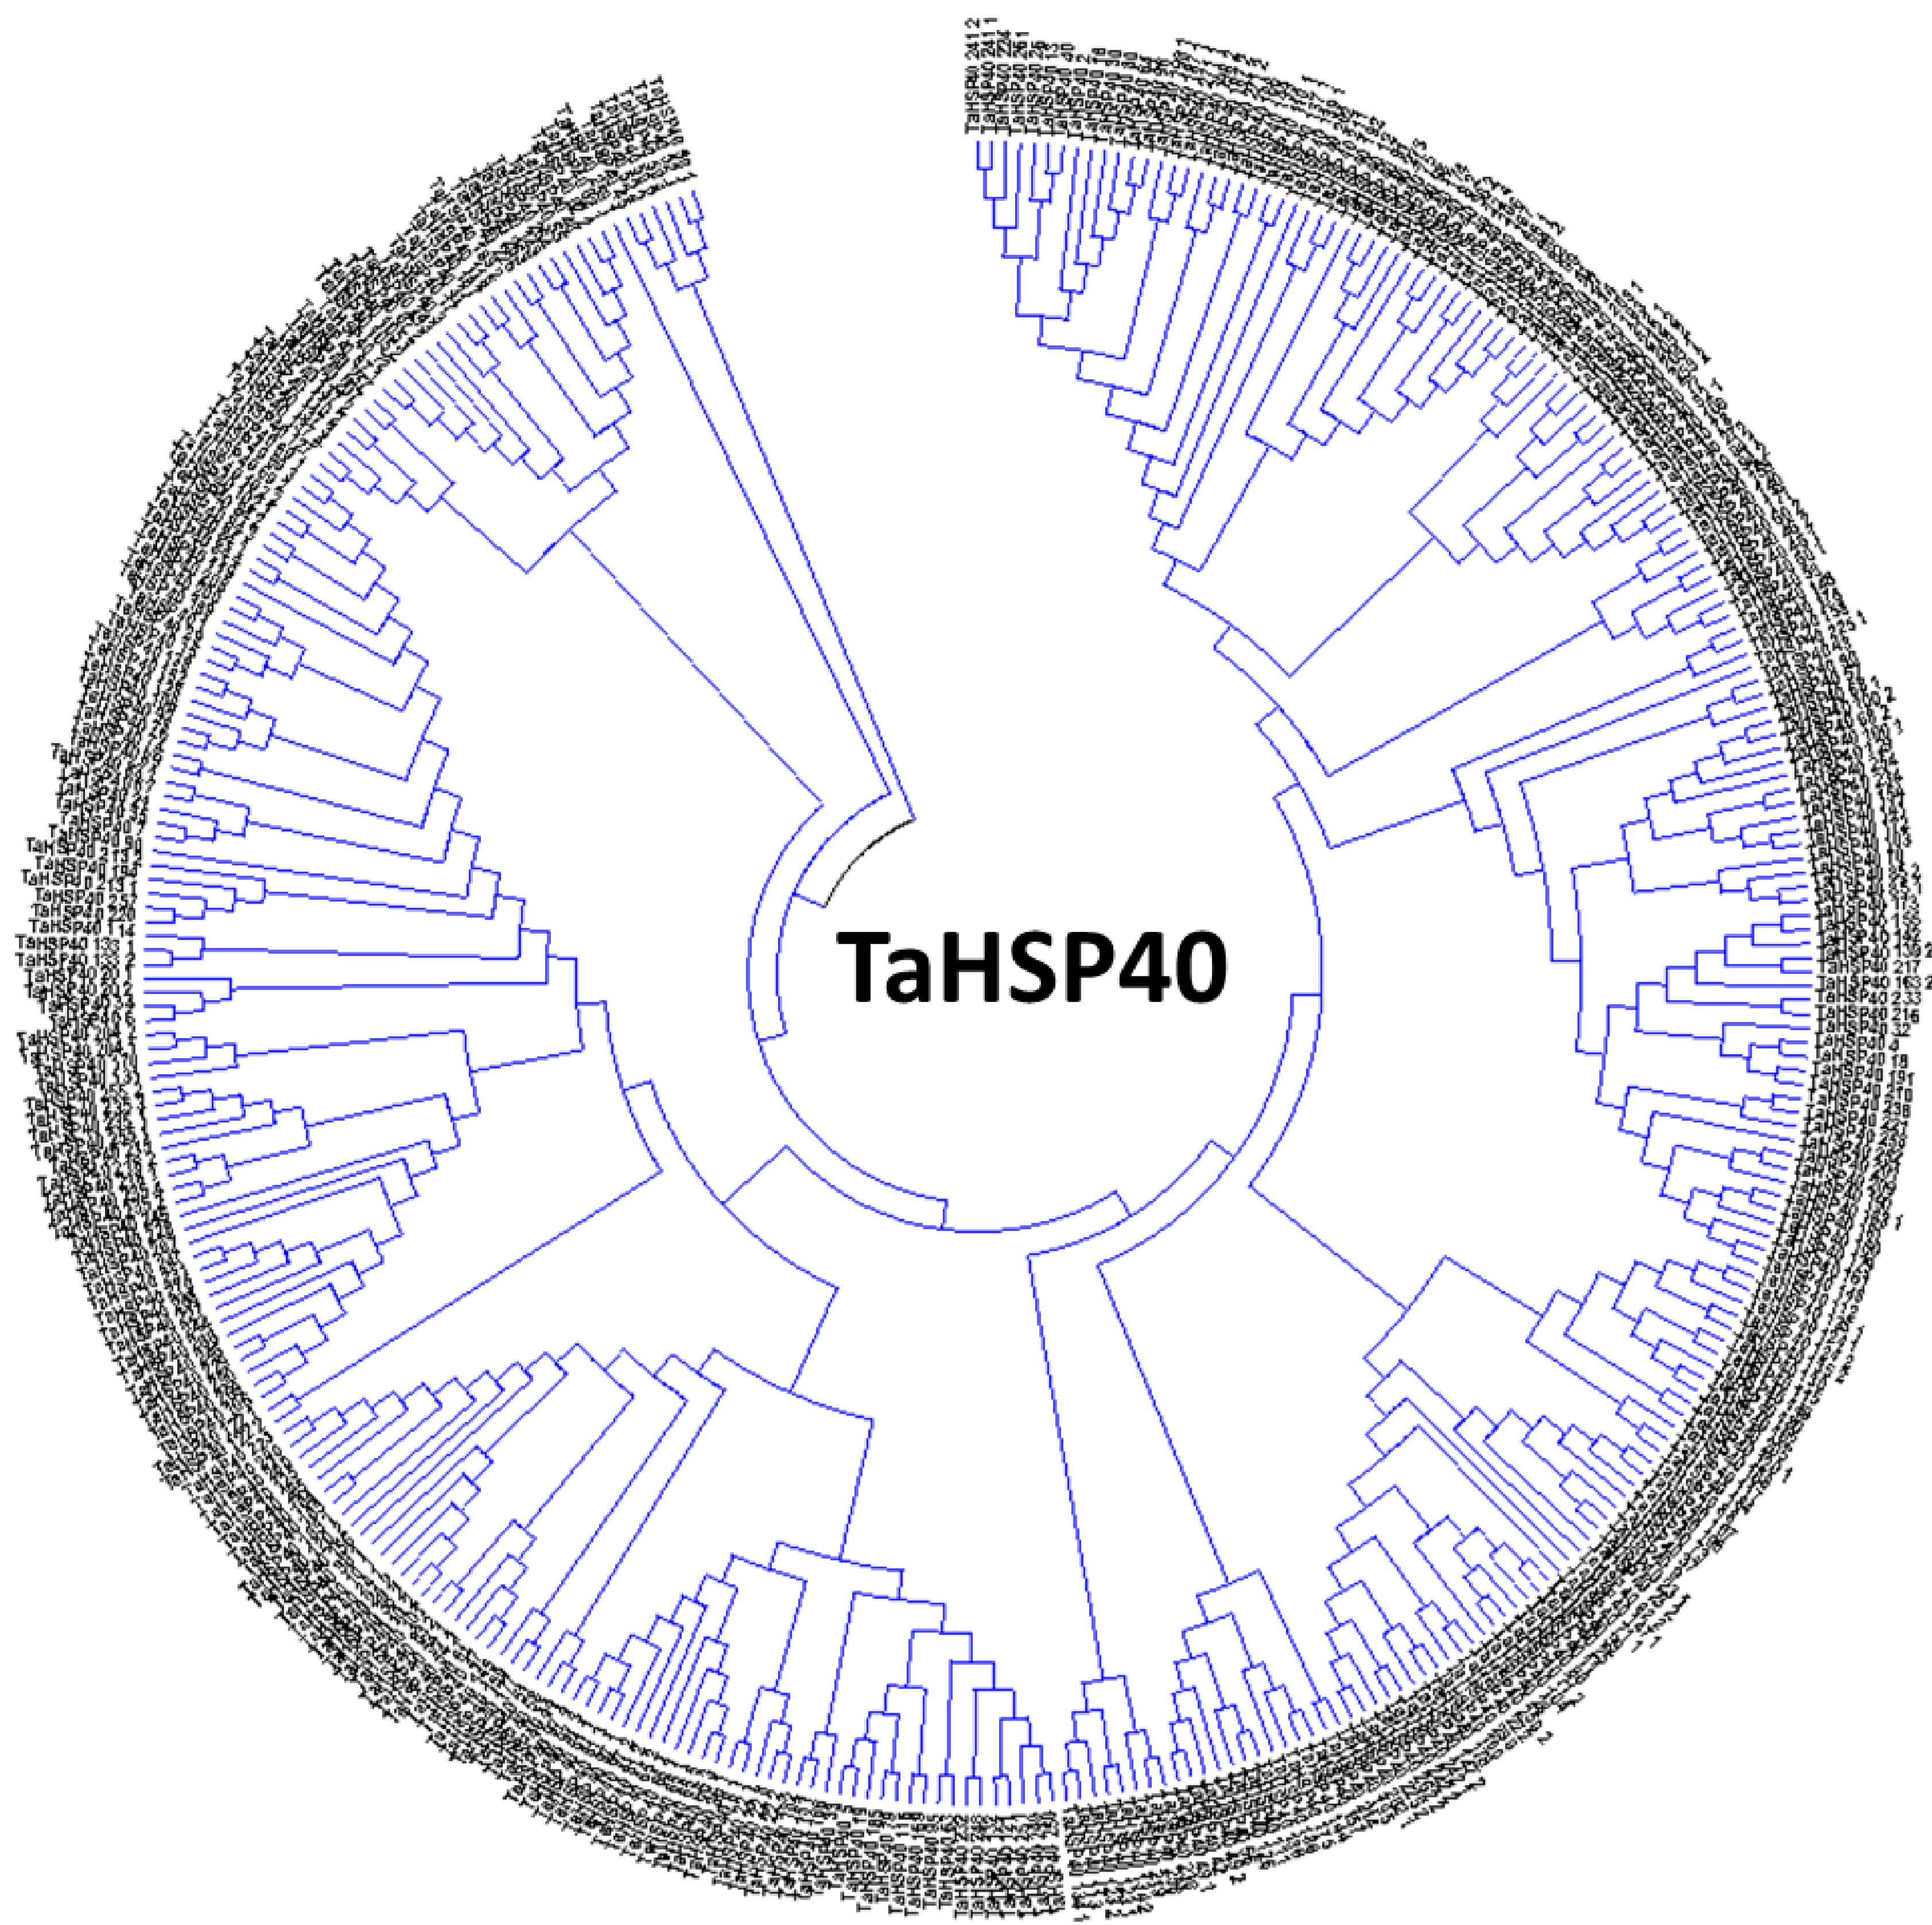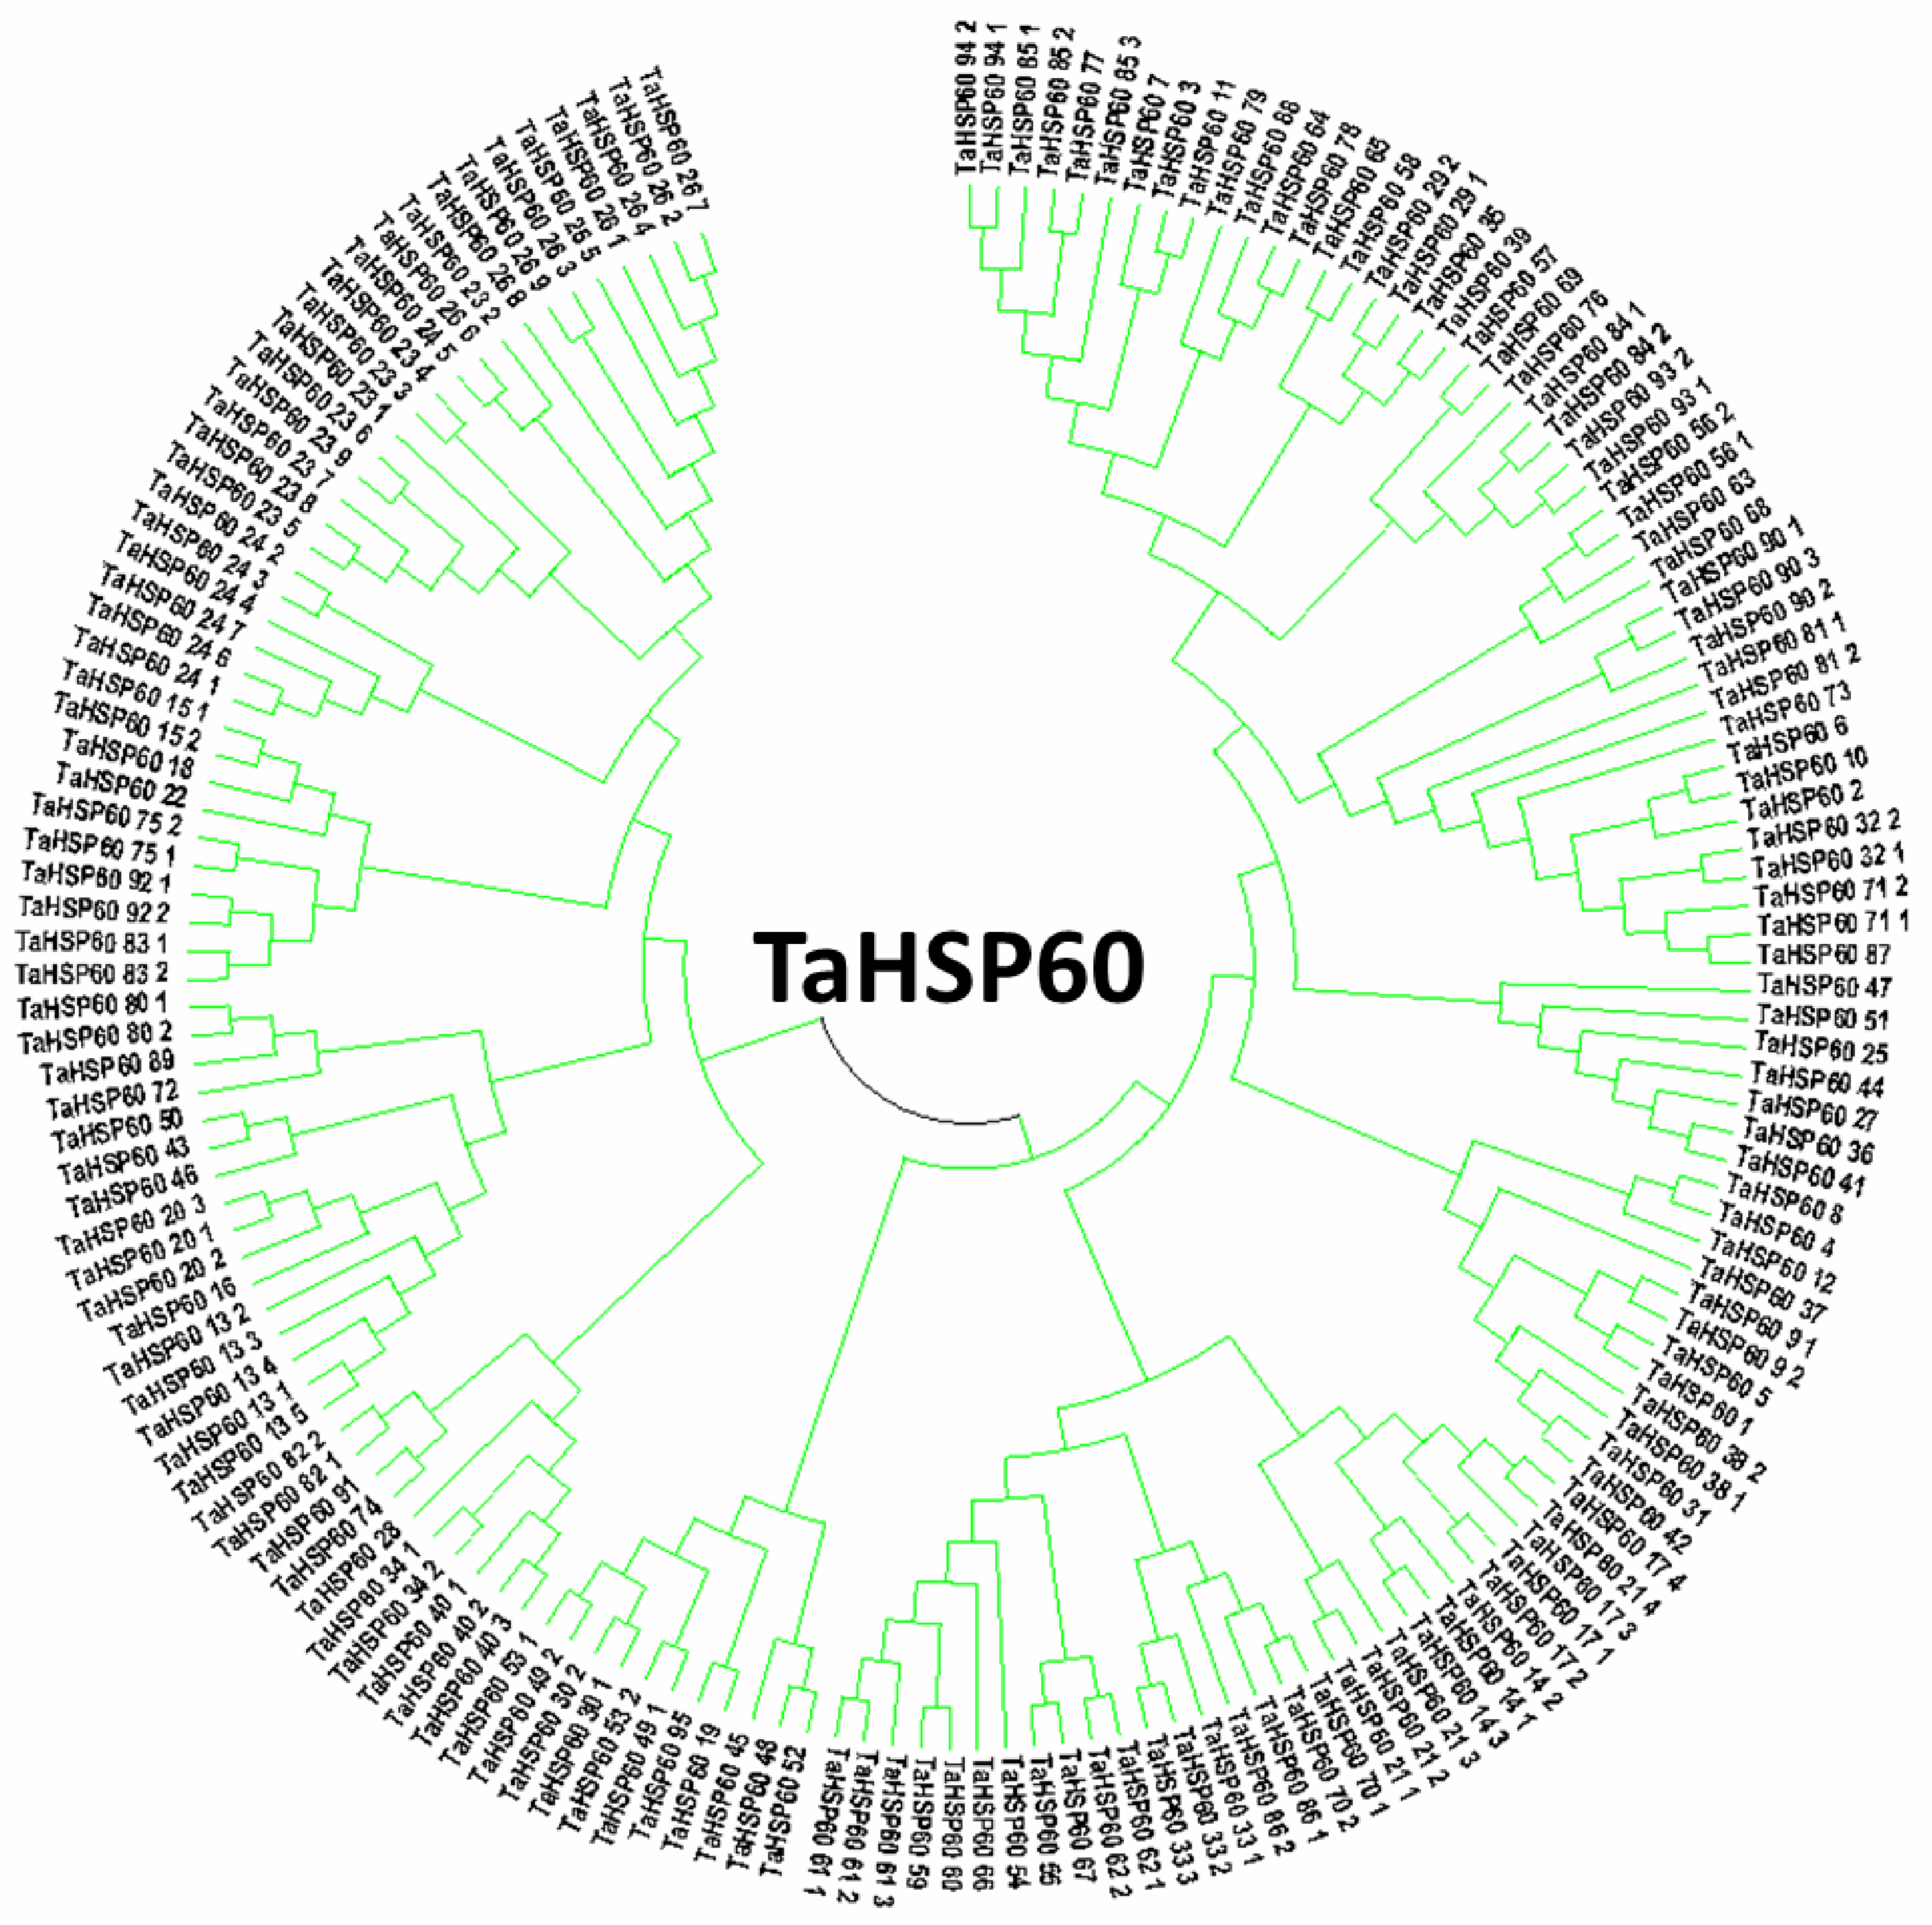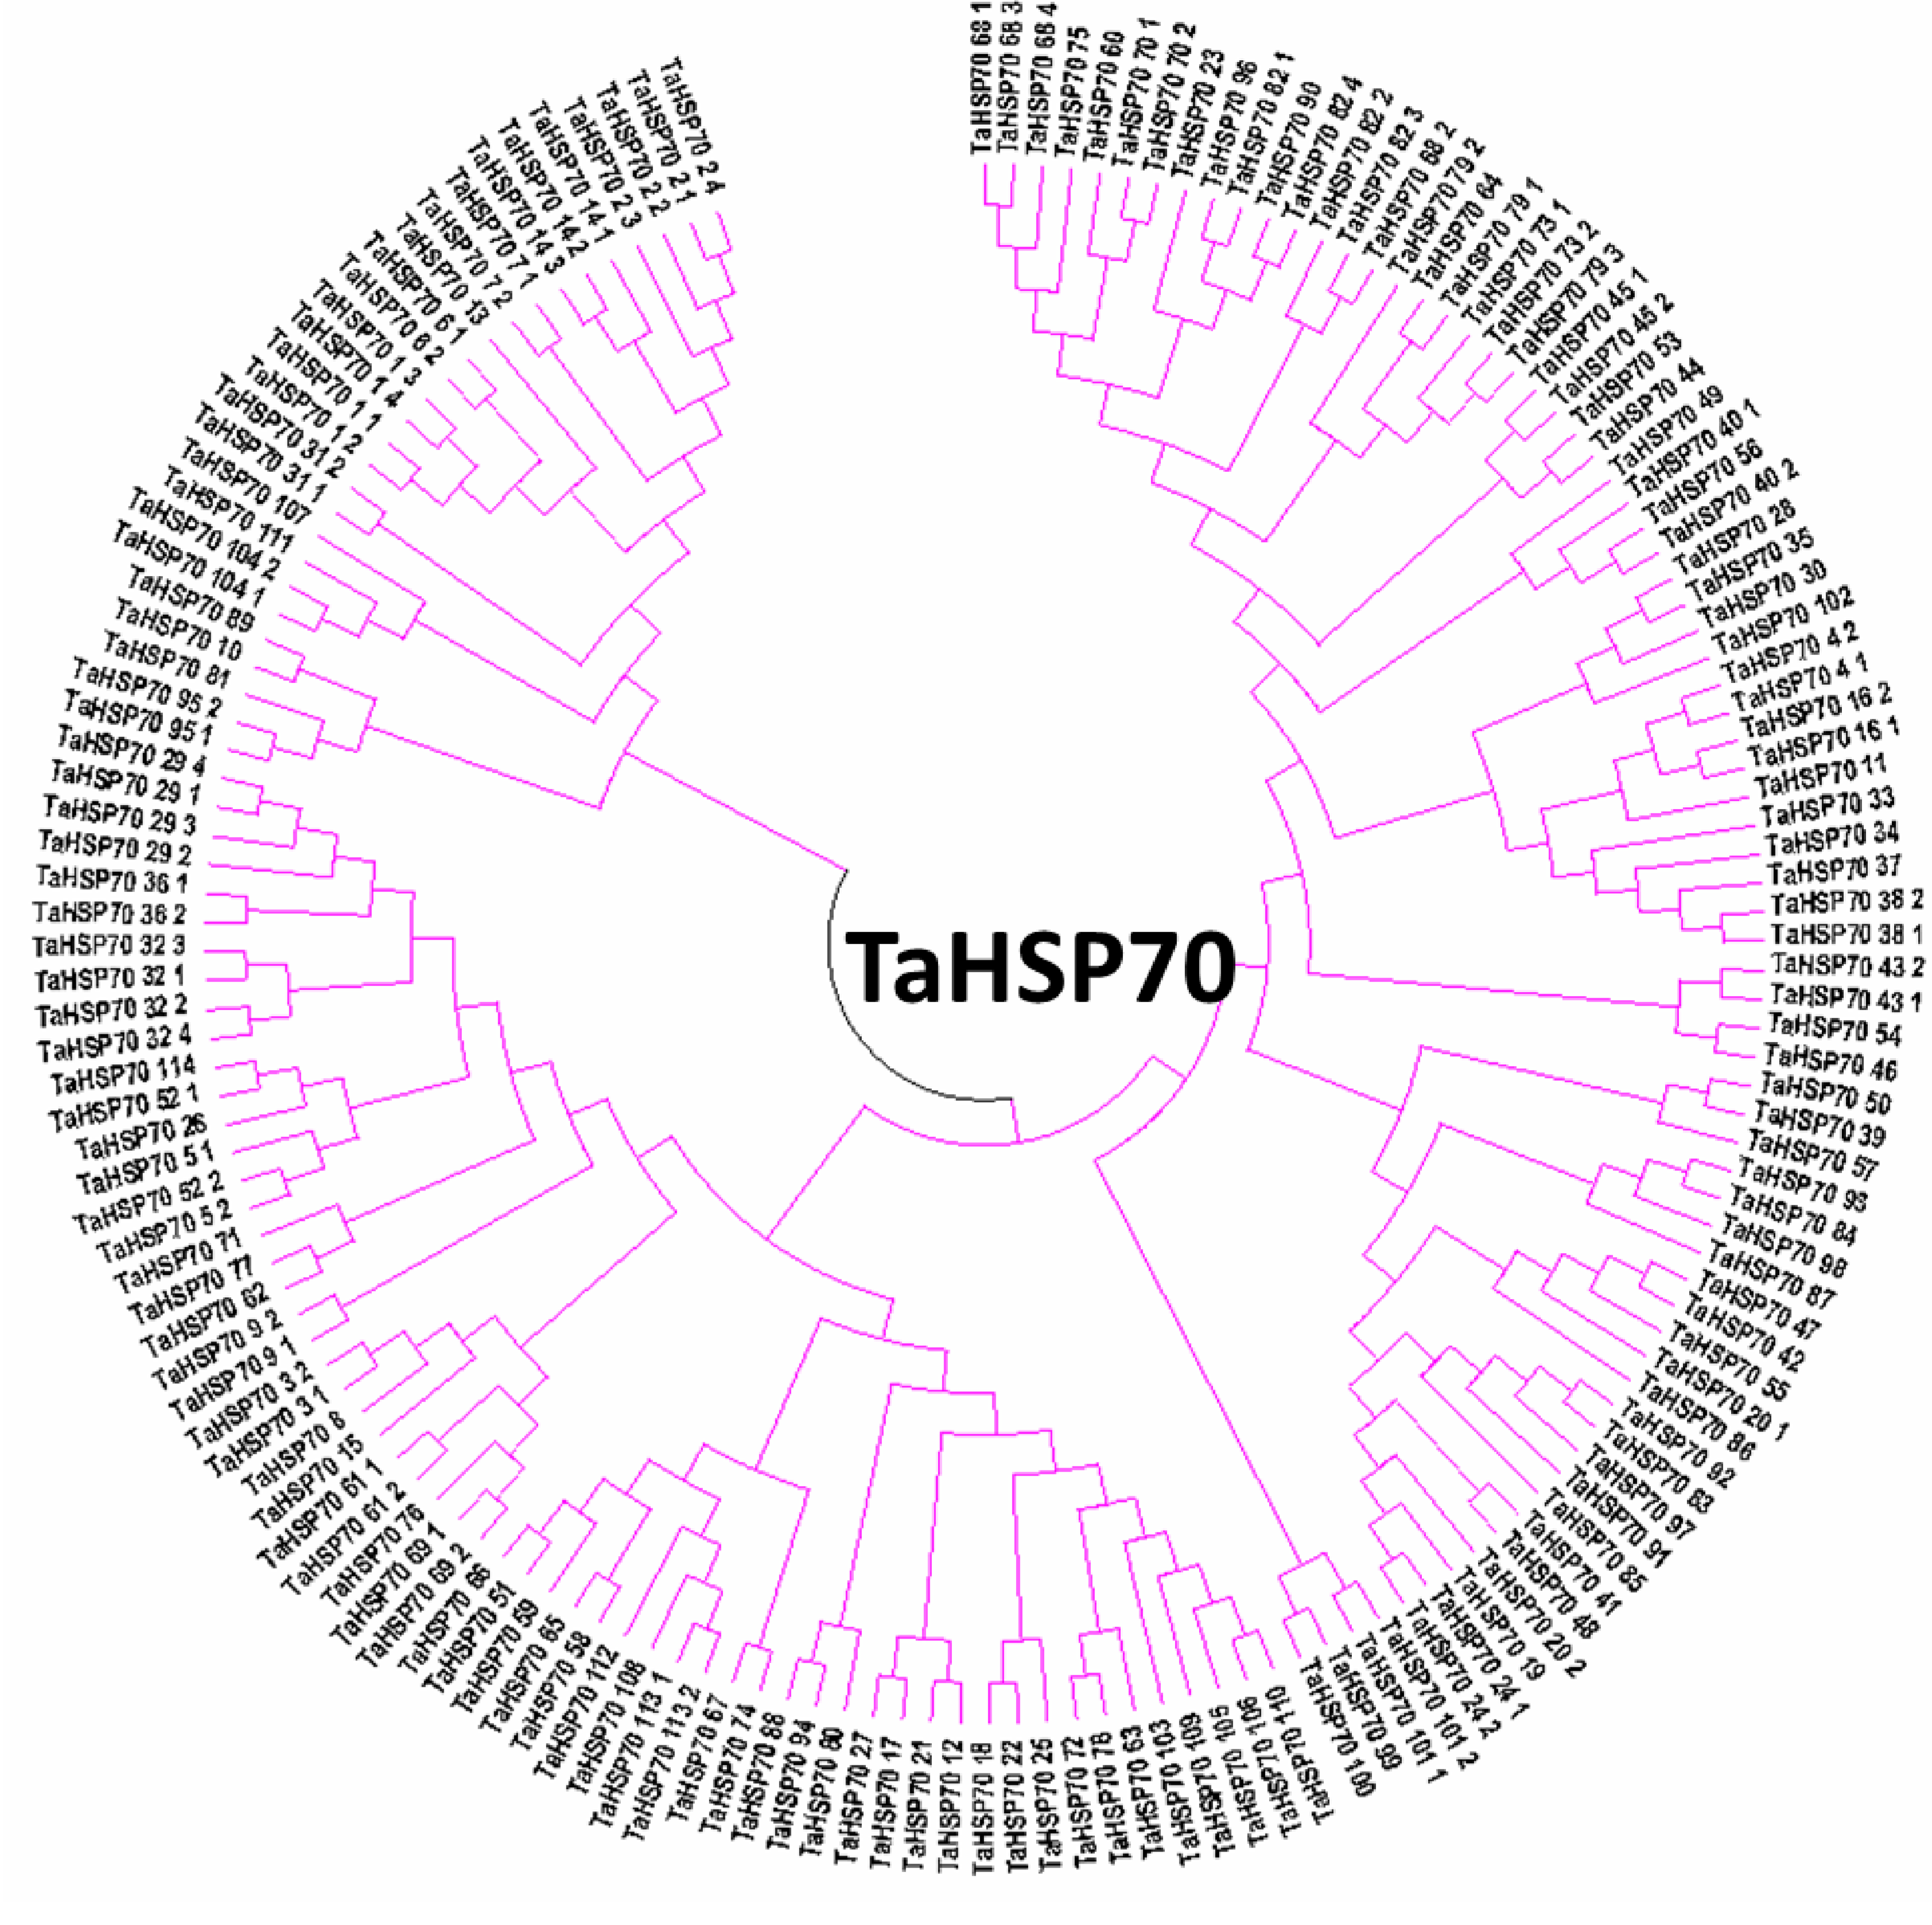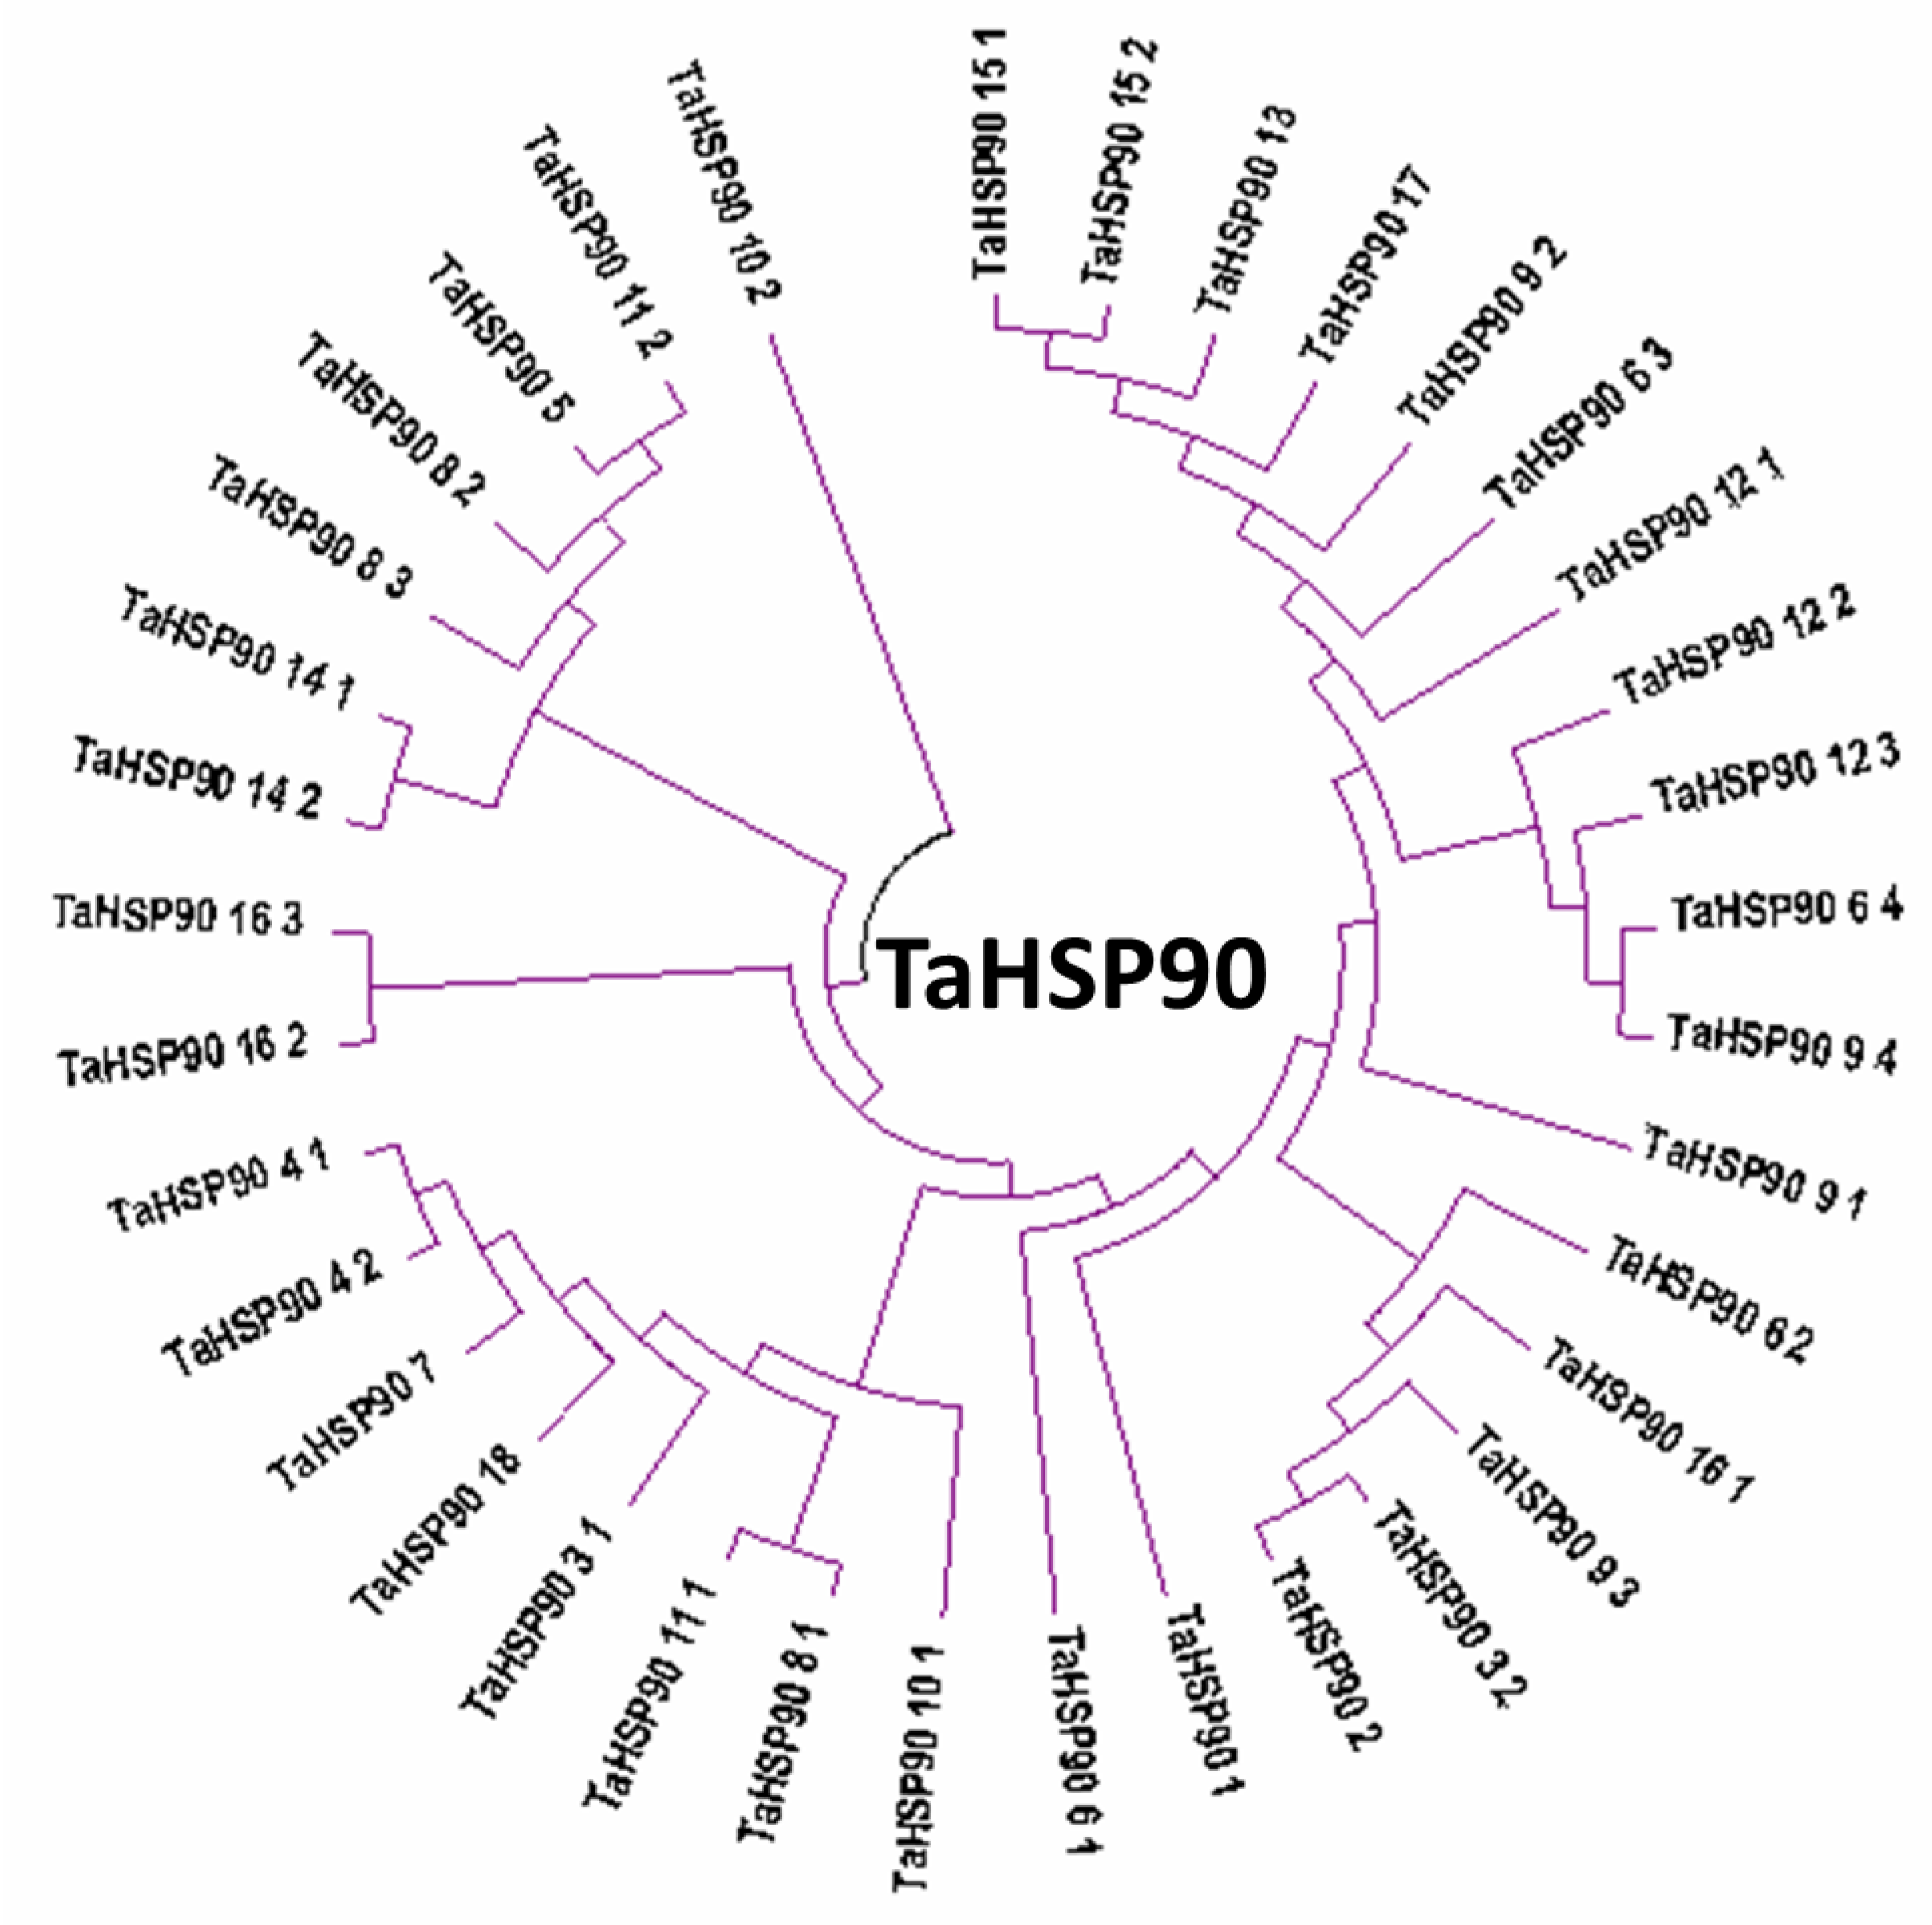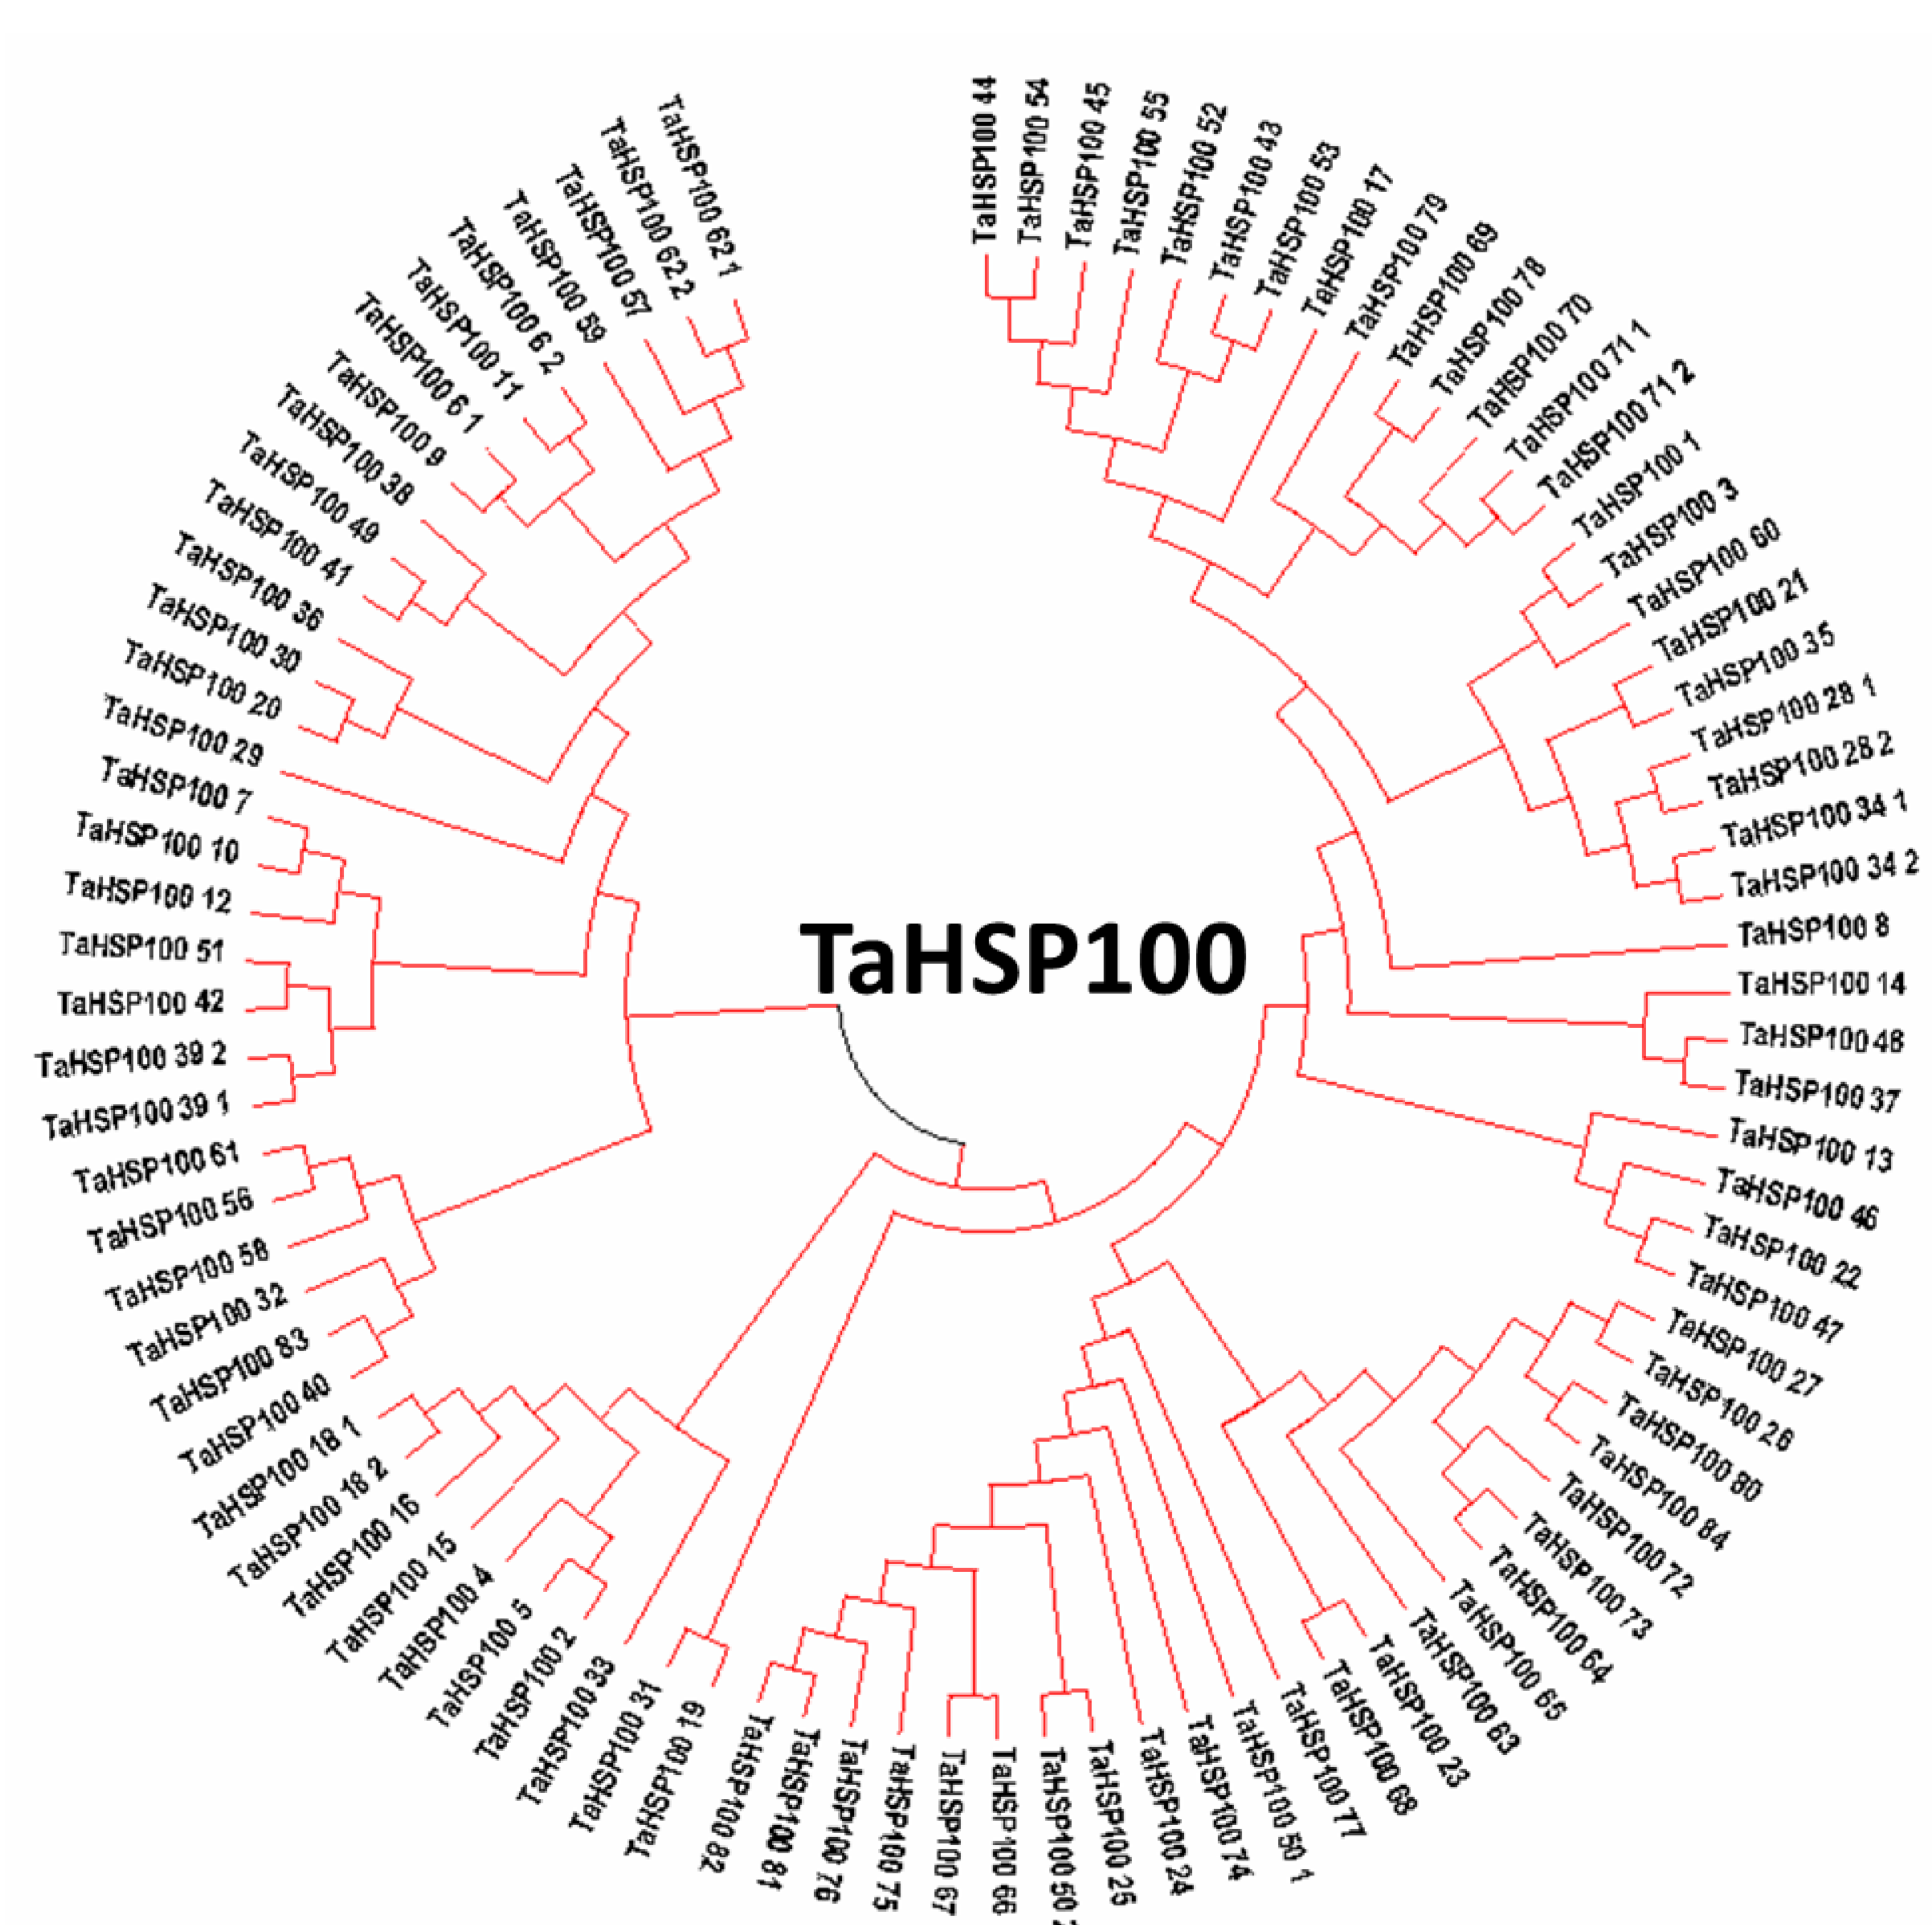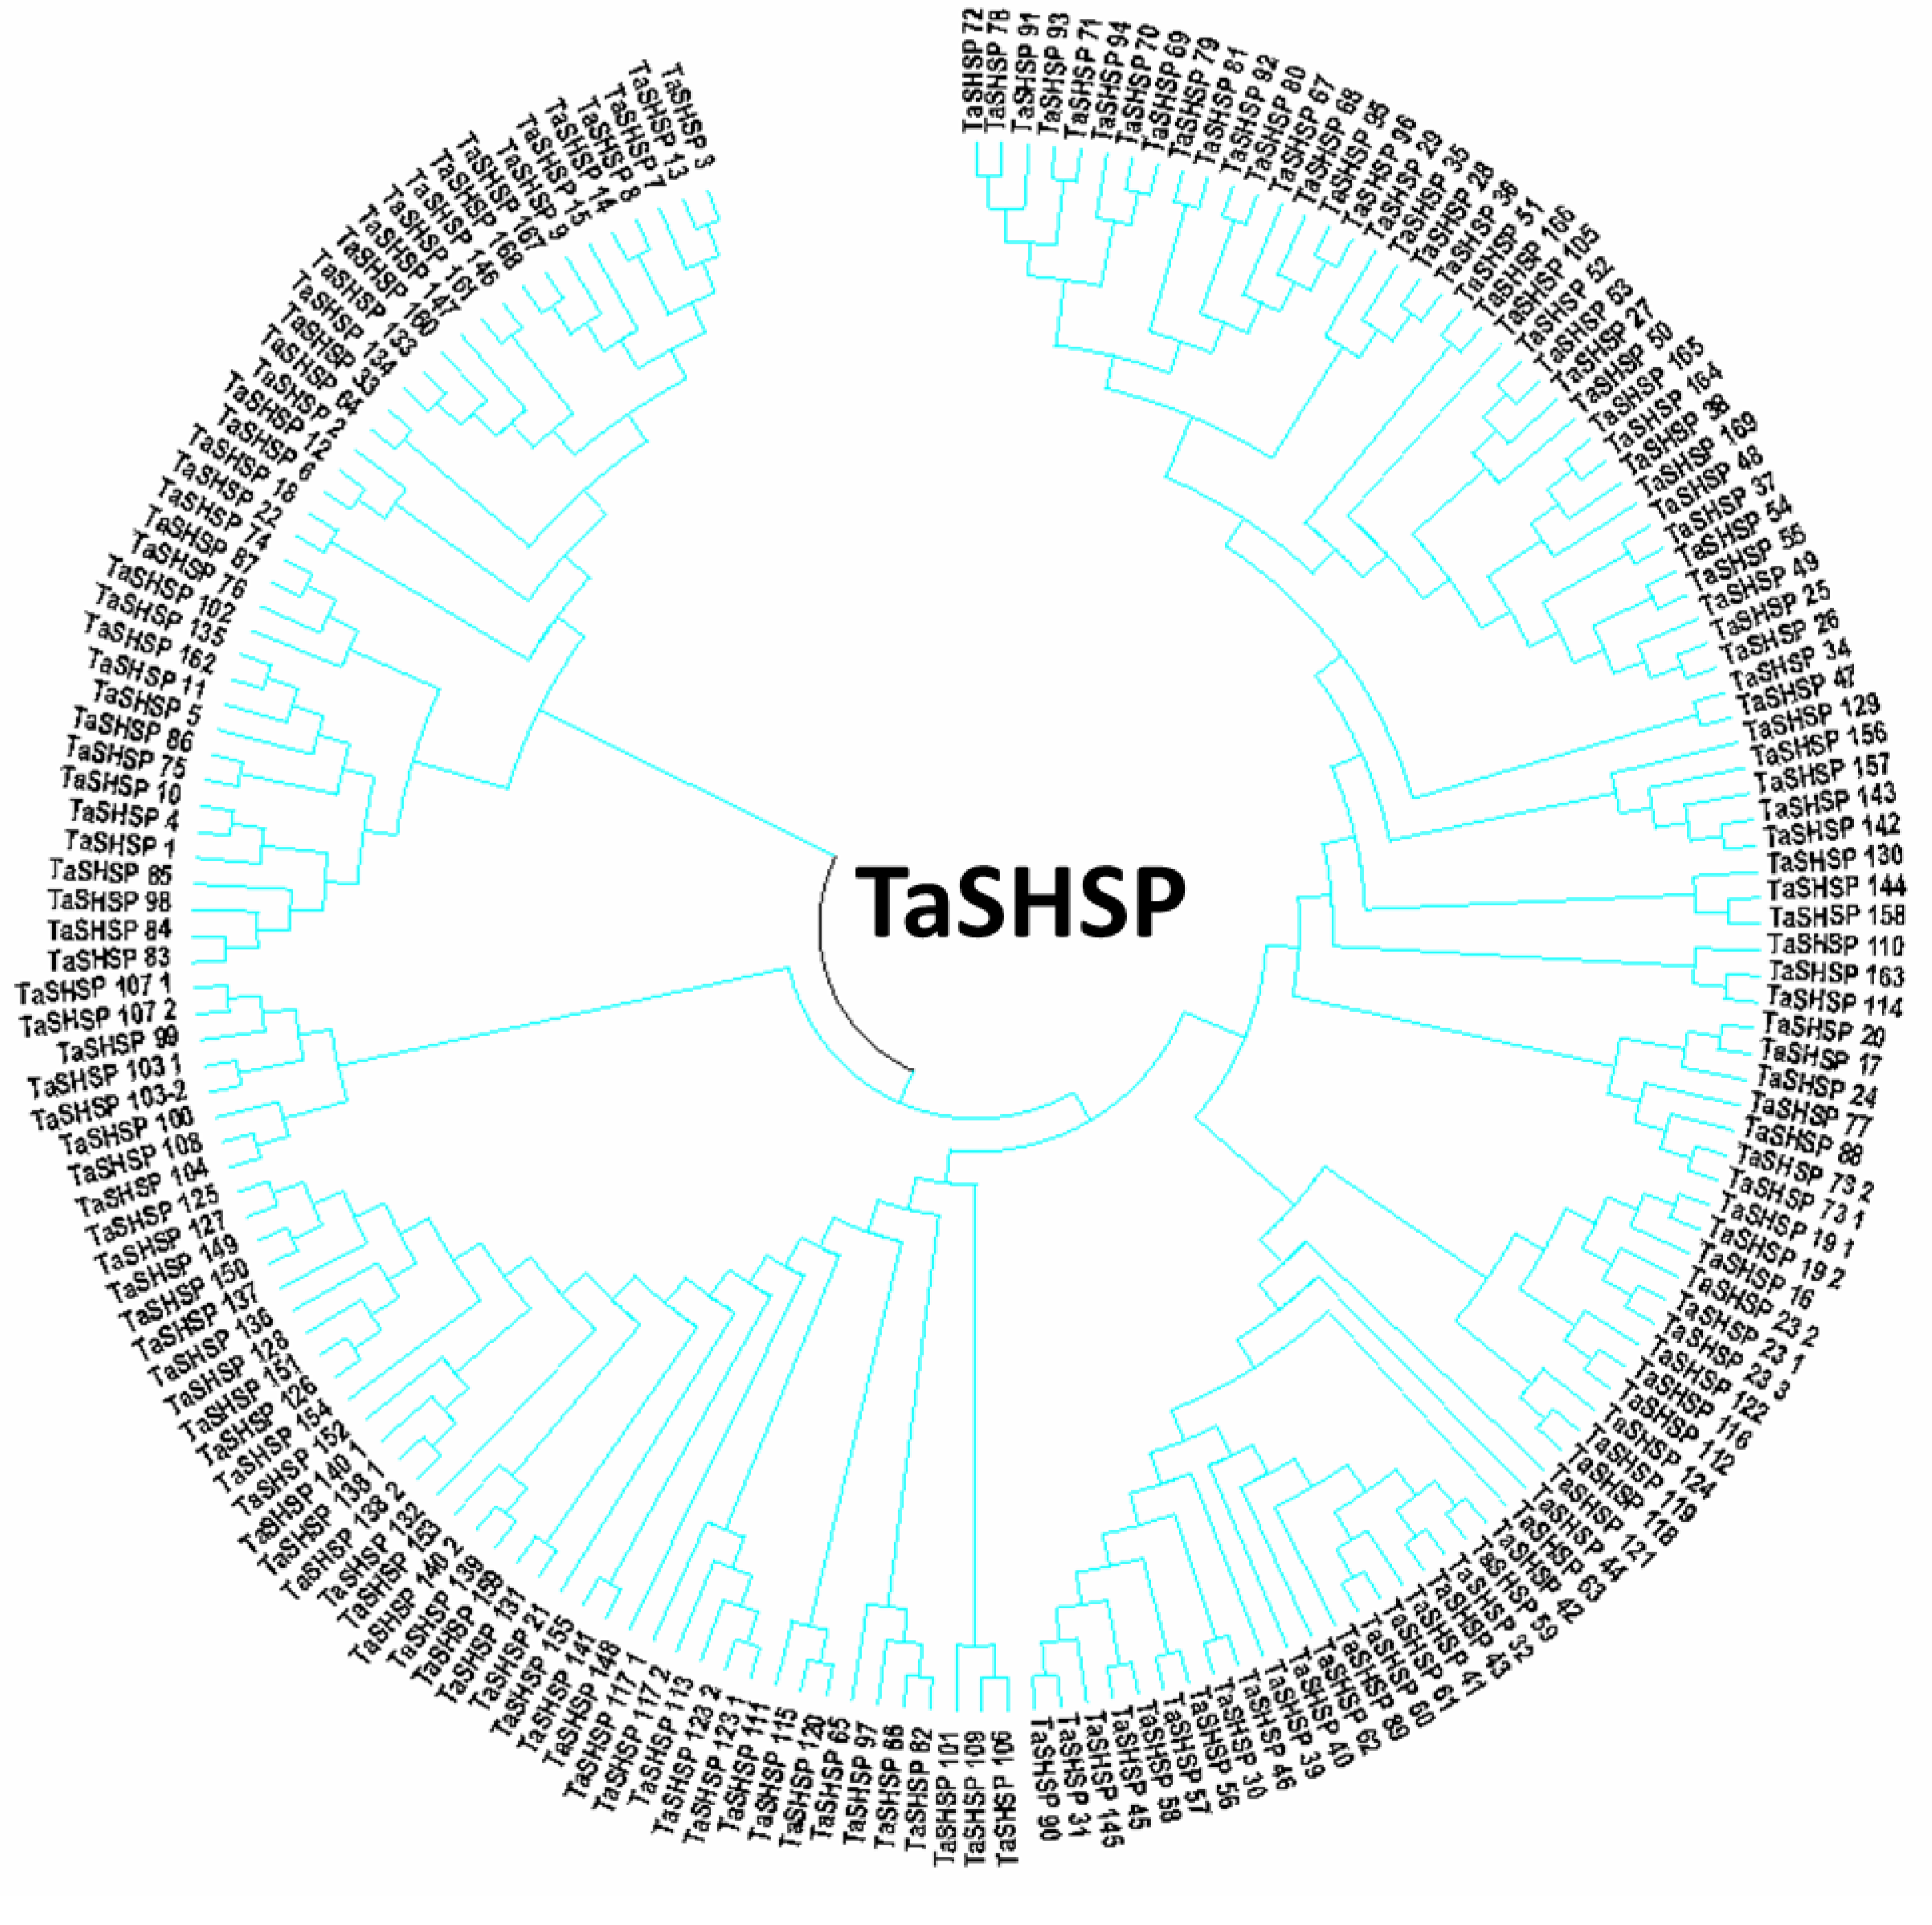

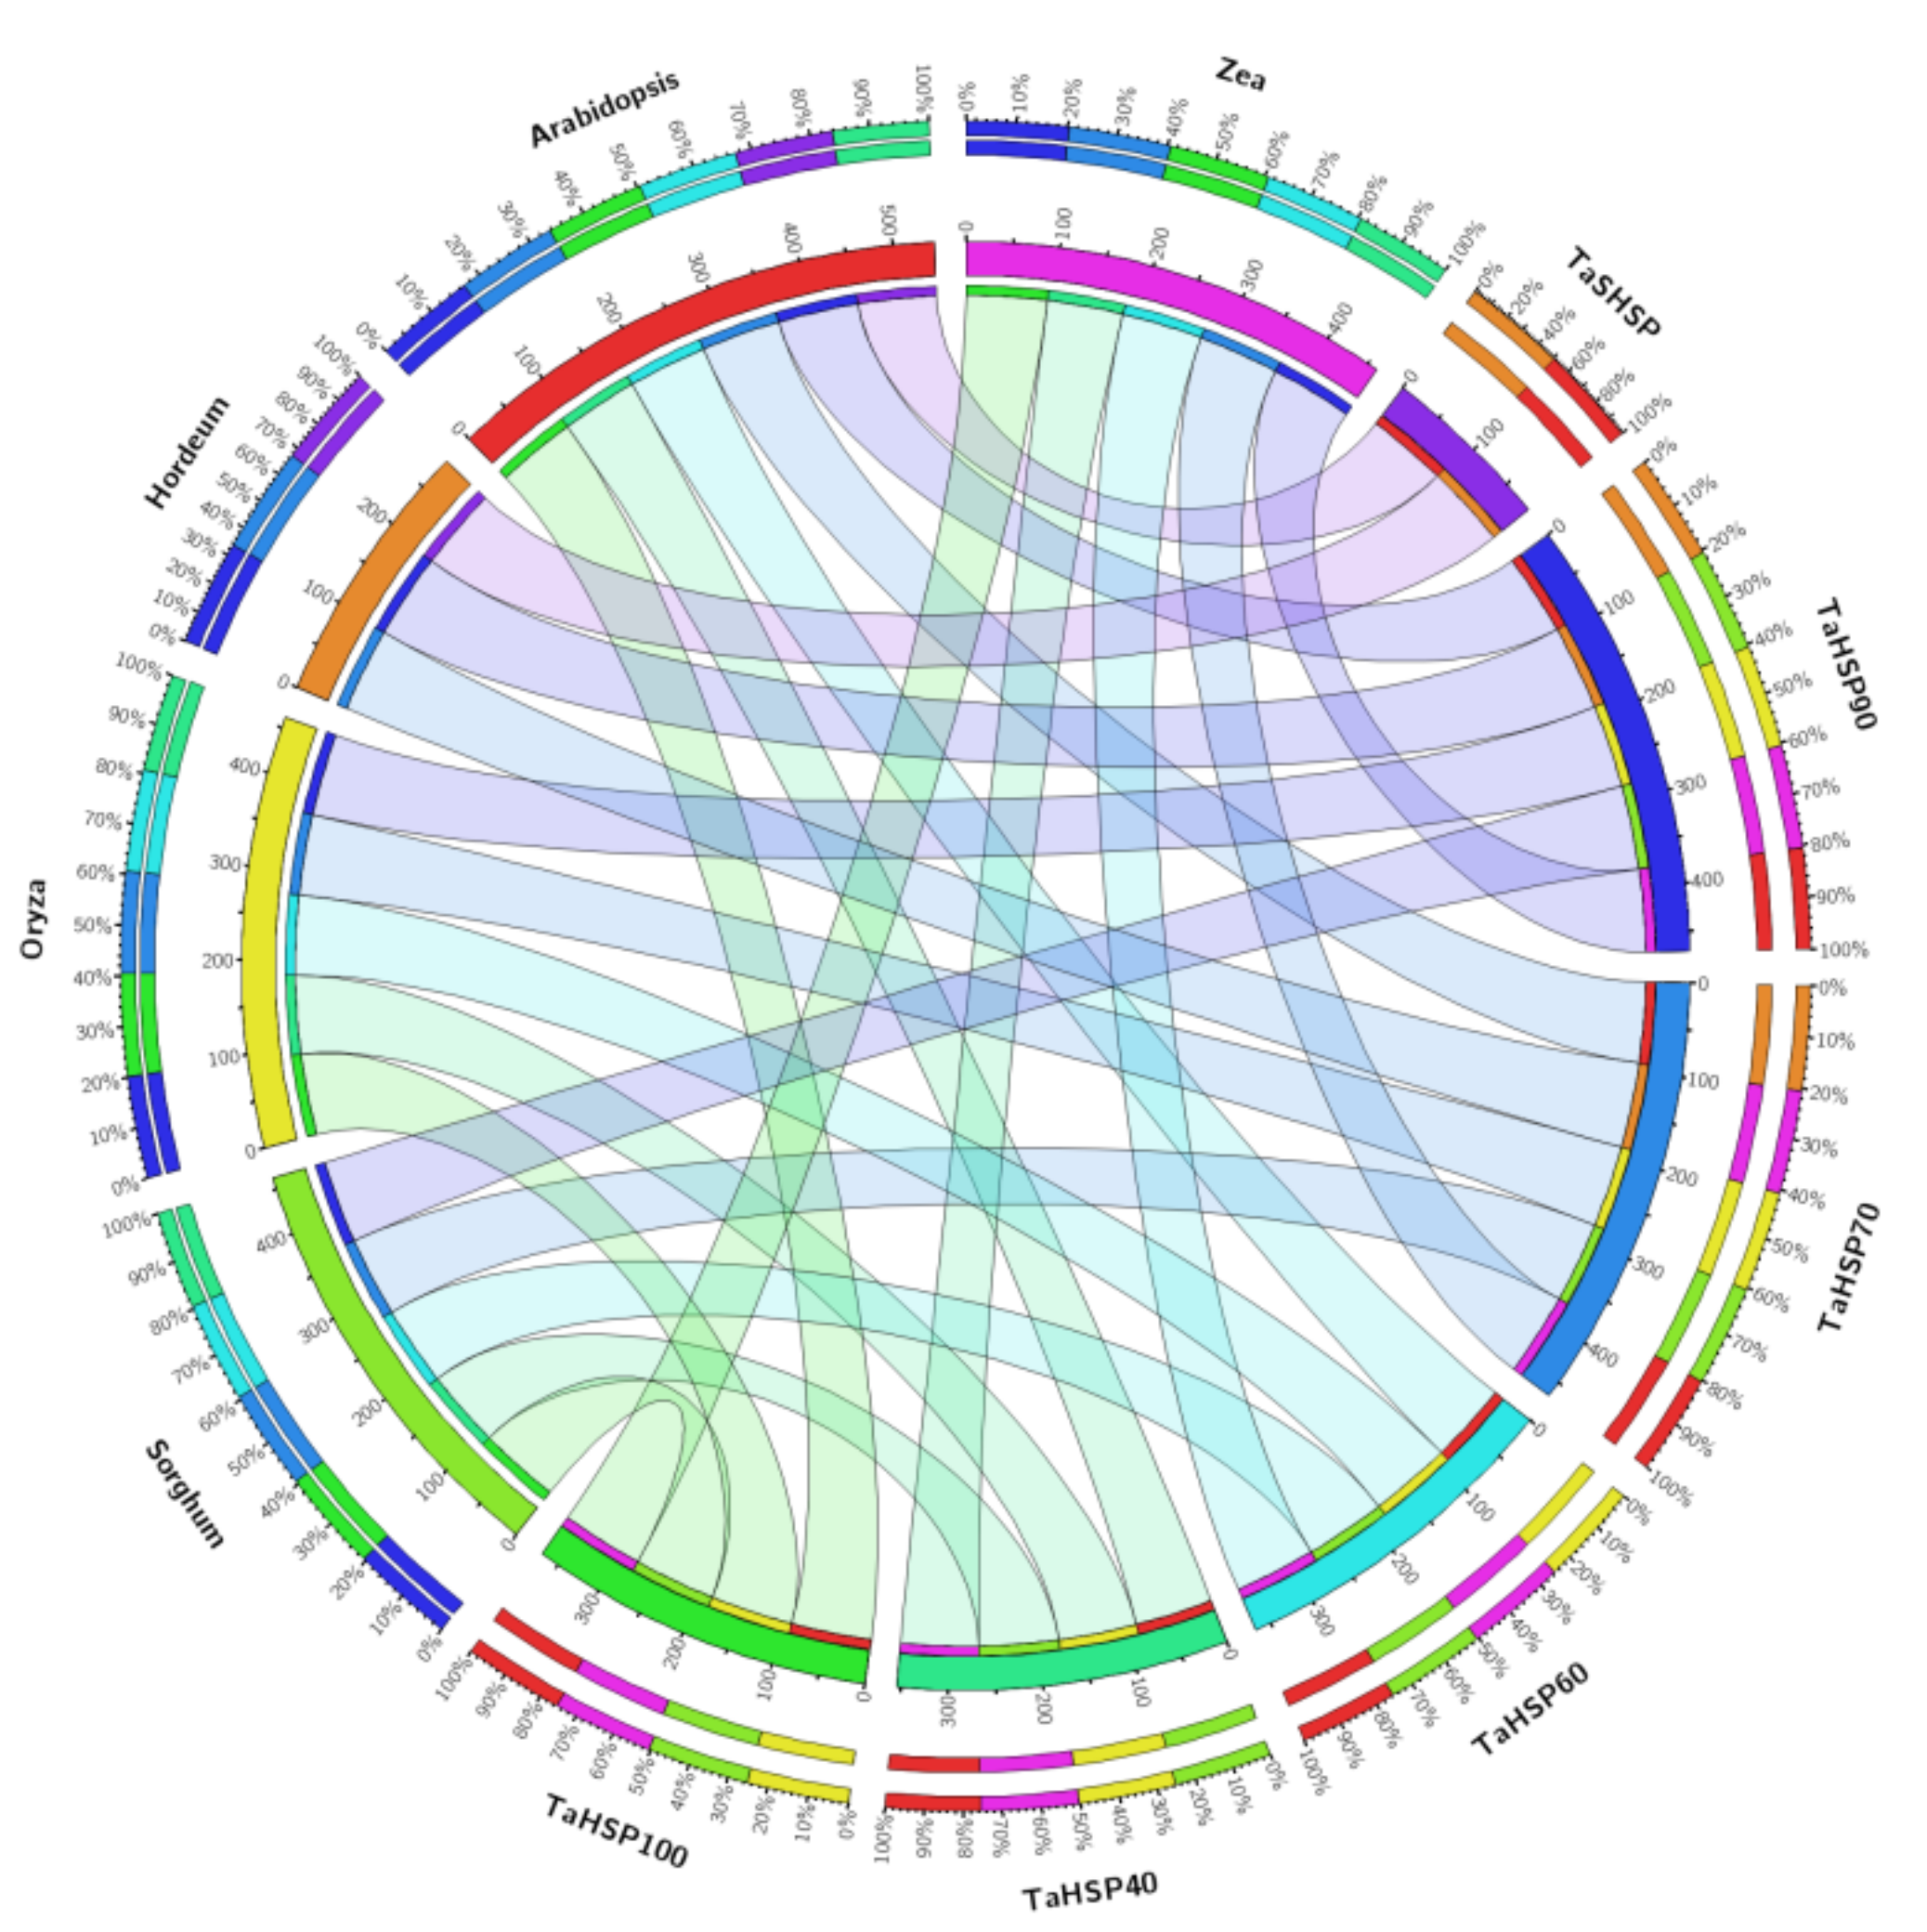

## Supplementary Data

**Figure S1:** Conserved Motifs of *TaHSPs* elucidated by MEME. Colored boxes representing different conserved motifs having different sequences and sizes.

**Figure S2:** Gene structure of all the 753 *TaHSP* genes, prepared using GSDraw

**Figure S3:** Blast2GO statistics based on BLAST search against the NR database

A: BLAST top-hit species distribution, B: Sequence similarity distribution

**Figure S4:** Bar graph representing the number of sequences of different subfamilies of *TaHSPs* distributed among various Cellular component (CC) Biological Process (BP) and Molecular Function (MF) depicted by blue, orange and green color.

**Figure S5:** Gene ontology term distribution in different HSP sub-families predicted using BLAST2GO in Biological Process.

**Figure S6:** Gene ontology term distribution in different HSP sub-families predicted using BLAST2GO in Cellular component

**Figure S7:** Sub-cellular localization predicted using BUSCO

**Figure S8:** Gene ontology term distribution in different HSP sub-families predicted using BLAST2GO in Molecular function.

**Figure S9:** Heatmaps representing the expression of all 753 *TaHSP* genes in various developmental stages. FPKM values were directly used to create the heatmaps.

**Figure S10:** Heatmaps representing the expression of all the 753 *TaHSP* genes in various stress conditions. FPKM values were directly used to create the heatmaps. Pst: *Puccinia striiformis*, Bgt: *Blumeria graminis*, dpi: days post inoculation

**Figure S11:** Isoelectric point vs. Molecular weight (kDa) plots of different *TaHSPs* subfamily.

**Figure S12:** Phylogenetic relationship within members of the different HSP sub-families in wheat, inferred using maximum likelihood method. A: *TaHSP40*; B: *TaHSP60*; C: *TaHSP70*; D: *TaHSP90*; E: *TaHSP100*, F: *TaSHSP*

**Figure S13:** Syntenic relationship of *TaHSPs* orthologous with its different monocots and dicots viz., *O. sativa*, *H. vulgure*, *S. bicolor*, *Z. mays* and *A. thaliana*.
